# Supplementary material for: Early initiation of post-sternotomy cardiac rehabilitation exercise training (SCAR): study protocol for a randomised controlled trial and economic evaluation
Source: PubMed Central journal article supplement — BMJ Open. 2018 Mar 23;8(3):e019748. doi: 10.1136/bmjopen-2017-019748 (PMC5875596; doi:10.1136/bmjopen-2017-019748), 2018-03-23
Supplement: bmjopen-2017-019748.draft_revisions.pdf [file bmjopen-2017-019748.draft_revisions.pdf]

# BMJ Open

BMJ Open is committed to open peer review. As part of this commitment we make the peer review history of every article we publish publicly available.

When an article is published we post the peer reviewers' comments and the authors' responses online. We also post the versions of the paper that were used during peer review. These are the versions that the peer review comments apply to.

The versions of the paper that follow are the versions that were submitted during the peer review process. They are not the versions of record or the final published versions. They should not be cited or distributed as the published version of this manuscript.

BMJ Open is an open access journal and the full, final, typeset and author-corrected version of record of the manuscript is available on our site with no access controls, subscription charges or pay-per-view fees (<http://bmjopen.bmj.com>).

If you have any questions on BMJ Open's open peer review process please email [info.bmjopen@bmj.com](mailto:info.bmjopen@bmj.com)

# BMJ Open

## Early initiation of post-sternotomy cardiac rehabilitation exercise training (SCAR): study protocol for a randomised controlled trial and economic evaluation.

|                               |                                                                                                                                                                                                                                                                                                                                                                                                                                                                                                                                                                                                                                                                                                                                                                                                                                                                                                                                                                                                                                                         |
|-------------------------------|---------------------------------------------------------------------------------------------------------------------------------------------------------------------------------------------------------------------------------------------------------------------------------------------------------------------------------------------------------------------------------------------------------------------------------------------------------------------------------------------------------------------------------------------------------------------------------------------------------------------------------------------------------------------------------------------------------------------------------------------------------------------------------------------------------------------------------------------------------------------------------------------------------------------------------------------------------------------------------------------------------------------------------------------------------|
| Journal:                      | <i>BMJ Open</i>                                                                                                                                                                                                                                                                                                                                                                                                                                                                                                                                                                                                                                                                                                                                                                                                                                                                                                                                                                                                                                         |
| Manuscript ID                 | bmjopen-2017-019748                                                                                                                                                                                                                                                                                                                                                                                                                                                                                                                                                                                                                                                                                                                                                                                                                                                                                                                                                                                                                                     |
| Article Type:                 | Protocol                                                                                                                                                                                                                                                                                                                                                                                                                                                                                                                                                                                                                                                                                                                                                                                                                                                                                                                                                                                                                                                |
| Date Submitted by the Author: | 22-Sep-2017                                                                                                                                                                                                                                                                                                                                                                                                                                                                                                                                                                                                                                                                                                                                                                                                                                                                                                                                                                                                                                             |
| Complete List of Authors:     | <p>Ennis, Stuart; University Hospitals Coventry and Warwickshire NHS Trust, Cardiac Rehabilitation; Cardiff Metropolitan University, Cardiff Centre for Exercise &amp; Health</p> <p>Lobley, Grace; University Hospitals Coventry and Warwickshire NHS Trust, Cardiac Rehabilitation</p> <p>Worrall, Sandra; University Hospitals Coventry and Warwickshire NHS Trust, Cardiac Rehabilitation</p> <p>Powell, Richard; University Hospitals Coventry and Warwickshire NHS Trust, Cardiac Rehabilitation</p> <p>Kimani, Peter; University of Warwick, Warwick Medical School</p> <p>Khan, Amir; Coventry University, Faculty of Health and Life Sciences</p> <p>Banerjee, Prithwish; University Hospitals Coventry and Warwickshire NHS Trust, Department of Cardiology</p> <p>Barker, Thomas; University Hospitals Coventry and Warwickshire NHS Trust, Cardiothoracic Surgery</p> <p>McGregor, Gordon; University Hospitals Coventry and Warwickshire NHS Trust, Cardiac Rehabilitation; Coventry University, Faculty of Health &amp; Life Sciences</p> |
| Keywords:                     | Coronary heart disease < CARDIOLOGY, HEALTH ECONOMICS, SPORTS MEDICINE, Cardiac surgery < SURGERY                                                                                                                                                                                                                                                                                                                                                                                                                                                                                                                                                                                                                                                                                                                                                                                                                                                                                                                                                       |

SCHOLARONE™  
Manuscripts

1  
2  
3 **Early initiation of post-sternotomy cardiac rehabilitation exercise training (SCAR):**  
4 **study protocol for a randomised controlled trial and economic evaluation.**  
5  
6  
7

8  
9 Stuart Ennis<sup>1,2</sup> Grace Lobley<sup>1</sup>, Sandra Worrall<sup>1</sup>, Richard Powell<sup>1</sup>, Peter K Kimani<sup>3</sup>,  
10 Amir Khan<sup>6</sup>, Prithwish Banerjee<sup>5,6</sup>, Tom Barker<sup>7</sup>, Gordon McGregor<sup>1,6\*</sup>  
11  
12  
13

14  
15 \*Corresponding Author: Department of Cardiac Rehabilitation  
16 Centre for Exercise & Health, Watch Close, Coventry CV1 3LN  
17 **Email:** gordon.mcgregor@uhcw.nhs.uk  
18 **Tel:** 02476 234 570  
19  
20  
21  
22

23 <sup>1</sup> Department of Cardiac Rehabilitation, Centre for Exercise & Health, University Hospital,  
24 Coventry, UK

25 <sup>2</sup> Cardiff Centre for Exercise & Health, Cardiff Metropolitan University, Cardiff, UK

26 <sup>3</sup> Statistics and Epidemiology, Division of Health Sciences, Warwick Medical School,  
27 University of Warwick, Warwick, UK

28 <sup>4</sup> Centre for Health Economics and Medicines Evaluation, Bangor University, Bangor, UK

29 <sup>5</sup> Department of Cardiology, University Hospital, Coventry, UK

30 <sup>6</sup> Health & Life Sciences Research Centre, Coventry University, Coventry, UK

31 <sup>7</sup> Department of Cardiothoracic Surgery, University Hospital, Coventry, UK  
32  
33  
34  
35  
36  
37  
38  
39

40 Key words: Coronary heart disease, coronary artery bypass graft, valve replacement, muscle  
41 atrophy, cardiovascular fitness  
42  
43  
44  
45

46 Word count: 3684  
47  
48  
49  
50  
51  
52  
53  
54  
55

## Abstract

**Introduction:** Current guidelines recommend abstinence from supervised cardiac rehabilitation (CR) exercise training for six weeks post-sternotomy. This practice is not based on empirical evidence, thus imposing potentially unnecessary activity restrictions. Delayed participation in CR exercise training promotes muscle atrophy, reduces cardiovascular fitness, and prolongs recovery. Limited data suggest no detrimental effect of beginning CR exercise training as early as two weeks post-surgery, but randomised controlled trials are yet to confirm this. The purpose of this trial is to compare CR exercise training commenced early (2 weeks post-surgery) with current usual care (6 weeks post-surgery) with a view to informing future CR guidelines for patients recovering from sternotomy.

**Methods and analysis:** In this assessor-blind randomised controlled trial, 170 cardiac surgery patients, recovering from sternotomy, will be assigned to eight weeks of twice weekly supervised CR exercise training commencing at either two weeks (early CR) or 6 weeks (usual care CR) post-surgery. Usual care exercise training will adhere to current UK recommendations. Participants in the early CR group will undertake a highly individualised 2-3 week programme of functional mobility, strength and cardiovascular exercise before progressing to a usual care CR programme. Outcomes will be assessed at baseline (in-patient), pre-CR (2 or 6 weeks post-surgery), post CR (10 or 14 weeks post-surgery) and 12 months. The primary outcome will be change in six-minute walk distance. Secondary outcomes will include measures of functional fitness, quality of life and cost effectiveness.

**Ethics and dissemination:** The study protocol v.1.0, dated 25<sup>th</sup> January 2017 was approved by the NHS Health Research Authority, West Midlands - Edgbaston Research Ethics Committee (17/WM/0057). Recruitment commenced July 2017 and will complete by December 2019. Results will be disseminated via national governing bodies, scientific meetings and peer-reviewed journals.

**Trial registration number:** This study is registered with ClinicalTrials.gov: NCT03223558

**Strengths and limitations of this study:**

- This trial will be conducted in a 'real world' community cardiac rehabilitation environment, ensuring a high degree of ecological validity.
- Randomisation and blinding will minimise any potential bias.
- As a limitation, this trial will only be performed in a single centre, thus potentially reducing external validity. Future trials should consider a multi-centre design.

For peer review only

## Introduction

Every year approximately 35,000 patients undergo coronary artery bypass graft (CABG) or aortic/mitral valve replacement surgery in the UK (1). Functional limitation is common and persistent after surgery, mediated by chest wall pain, respiratory complications, fatigue, and anxiety concerning the resumption of daily activities (2-4). At 12 months, previous studies have reported sternal wound pain in nearly 50% of patients (2), and 'unsatisfactory' functional status and quality of life in a third of patients (5). These issues can delay return to work, particularly for those with physically demanding jobs, and the financial consequences can be significant (6, 7).

The benefits of cardiac rehabilitation (CR) exercise training after sternotomy are well documented. A recent Cochrane review reported reduced cardiovascular mortality and hospital readmissions, in addition to improved quality of life (8). Higher fitness levels following CR exercise training also predict better outcomes and lower mortality rates (9). Historically, supervised CR exercise training does not commence until 42 days (6 weeks) after surgery, during which time functional capacity can deteriorate rapidly (8). This guideline emanates from concerns that exercise may slow healing or increase the likelihood of sternal instability and infection (6). These concerns may be justified given that serious complications, such as mediastinitis, are associated with significant mortality (10, 11). To date, however, there is no evidence directly linking early post-operative physical activity to an increased risk of sternal complications (6).

Existing sternal precautions are likely the product of expert opinion and anecdotal evidence. Consequently, practice varies considerably in hospitals and CR centres around the world (7). Sternal precautions, which often lack individualisation, may be overly

1  
2  
3 restrictive, reinforcing fear of activity, and delaying recovery (12, 13). Indeed, long periods  
4 of inactivity, particularly in the elderly, can slow healing and promote muscle atrophy. The  
5 Dallas bed rest studies demonstrated that three weeks of total inactivity had a more  
6 profound impact on exercise capacity than 30 years of aging (14, 15). Cardiac muscle mass  
7 has also been shown to decrease by 8% after six weeks of bed rest (15). Additionally,  
8 inactivity of 10-12 days is sufficient to lead to a loss of skeletal muscle mass of 0.5-0.6%  
9 per day (16). This avoidable muscle wasting is likely to be accelerated in elderly patients,  
10 with potentially significant consequences. The increased risk of falls associated with  
11 muscle atrophy can lead to hip or pelvic fractures, for which the one year mortality rate can  
12 be as high as 40% (17).  
13  
14  
15  
16  
17  
18  
19  
20  
21  
22  
23  
24  
25

26 Evidence for the safety of earlier CR (<6 weeks post-surgery) exercise training in  
27 sternotomy patients is accumulating (18). Studies have shown that in-patient walking and  
28 cycling, 1-7 days post-surgery, is safe and effective (19, 20). Further, no difference was  
29 found in hospital readmissions, infection rates or sternal instability between patients who  
30 started CR exercise training 10 days or 4-7 weeks post-discharge (21). Consequently,  
31 current post-sternotomy activity restrictions may be overly cautious. On the grounds of  
32 safety, surgical patients are commonly advised to avoid lifting more than 5 lbs for 12  
33 weeks after surgery. Adams and colleagues, however, reported that the forces generated by  
34 sneezing and coughing (commonly endured without incident) far exceed that of upper-  
35 body dumbbell exercise and other restricted daily activities such as lifting a coffee pot and  
36 pushing a lawn mower (7, 12). There is little empirical evidence to support universal  
37 restriction of such activities for 12 weeks post sternotomy.  
38  
39  
40  
41  
42  
43  
44  
45  
46  
47  
48  
49  
50  
51  
52  
53  
54  
55  
56  
57  
58  
59  
60

1  
2  
3 A number of studies have highlighted the detrimental effects of delayed enrolment on CR  
4 programmes following cardiac surgery. In the UK, the National Audit for Cardiac  
5 Rehabilitation (NACR), recently reported that, for every 1-day increase in CR wait time,  
6  
7 patients were 1% less likely to improve across all fitness-related measures (22). This finding  
8  
9 is supported by Canadian data which, in an analysis of 6497 CABG patients, found that  
10  
11 longer wait times before CR initiation were associated with lesser improvement in  
12  
13 cardiovascular fitness (23). Attendance on CR programmes is also negatively impacted by  
14  
15 extended waits. Studies have consistently determined that patients are less likely to attend and  
16  
17 adhere to CR, the longer they are required to wait post-cardiac event (24, 25)  
18  
19  
20  
21  
22  
23

24 Evidence to support the earlier initiation of post-sternotomy CR exercise training is,  
25  
26 therefore, apparent in a number of areas. Muscle mass and cardiovascular fitness decline  
27  
28 rapidly with post-surgical inactivity, and when CR programme initiation is delayed,  
29  
30 attendance is lower, and the benefits of exercise training are reduced. Moreover, there is  
31  
32 insufficient evidence to support the current guideline of a six week wait post-surgery, and  
33  
34 safety does not appear to be compromised by earlier CR. Whilst the growing evidence base  
35  
36 for earlier post-sternotomy CR exercise training is relatively compelling, good quality  
37  
38 prospective trials have not been performed. As such, randomised controlled trials are required  
39  
40 to confirm benefit, safety and cost effectiveness. Results of such studies are essential before  
41  
42 national guidelines can be established, allowing policymakers and clinicians to be confident  
43  
44 in altering practice.  
45  
46  
47  
48  
49

50 The early initiation of post-sternotomy cardiac rehabilitation exercise training (SCAR) trial is  
51  
52 a single-centre randomised controlled trial, and economic evaluation, comparing supervised  
53  
54  
55



1  
2  
3 exercise training commenced at two weeks (early CR) with exercise training commenced at  
4  
5 six weeks (usual care CR) post-sternotomy. The main objectives of the trial are:  
6  
7

- 8  
9 1. To assess the effect of early CR on functional fitness.
- 10  
11 2. To assess the effect of early CR on anxiety, depression and health related quality of  
12  
13 life (HR-QoL).
- 14  
15 3. To assess compliance and adherence to early CR.
- 16  
17 4. To assess the cost effectiveness of early CR.
- 18  
19 5. To assess the safety of early CR  
20  
21  
22  
23

24 In cardiac surgery patients recovering from sternotomy, our primary hypothesis is that early CR  
25  
26 will improve walking distance to the same extent as usual care CR. With limited data on early  
27  
28 CR in this population, particularly in the UK, we propose a holistic investigation including  
29  
30 the following secondary hypotheses: early CR will 1) be as effective as usual care CR in  
31  
32 improving functional fitness; 2) be as effective as usual care CR in improving anxiety and  
33  
34 depression; 3) be as effective as usual care CR in improving HR-QoL; 4) demonstrate  
35  
36 equivalent adherence and compliance to usual care CR; 5) be as cost effective as usual care  
37  
38 CR; 6) be as safe as usual care CR.  
39  
40  
41  
42  
43

#### 44 **Methods and analysis**

45  
46 The SCAR study is an assessor-blind parallel group, randomised controlled trial and  
47  
48 economic evaluation. Participants will be randomly allocated to eight weeks of CR exercise  
49  
50 training commencing at either two weeks (early CR) or six weeks (usual care CR) post-  
51  
52 surgery. Outcomes will be measured at baseline (within 7 days of surgery), start of CR (2 or 6  
53  
54  
55

1  
2  
3 weeks), end of CR (10 or 14 weeks), and at 12 months. Assessors will be blinded to group  
4  
5 allocation. The trial protocol adheres to the Standard Protocol Items: Recommendations for  
6  
7 Clinical Trials (SPIRIT) guidelines (26).  
8  
9

## 10 11 **Setting**

12  
13 The SCAR trial will be conducted at two cardiac rehabilitation venues provided by  
14  
15 University Hospitals Coventry & Warwickshire (UHCW) NHS Trust, 1) Atrium Health,  
16  
17 Centre for Exercise & Health, Coventry, and 2) Hospital of St. Cross, Rugby. Both CR  
18  
19 programmes are certified by the British Association of Cardiovascular Prevention and  
20  
21 Rehabilitation (BACPR), thus, providing the necessary infrastructure and expertise for the  
22  
23 delivery of the SCAR intervention. All cardiac surgery will be performed at University  
24  
25 Hospital, Coventry, a national specialist tertiary cardiac centre. One hundred and seventy  
26  
27 patients will be recruited over a two-year period, commencing July 2017.  
28  
29  
30  
31  
32

## 33 **Participants**

34  
35 All patients who are to undergo elective or emergency sternotomy for coronary artery  
36  
37 bypass graft surgery or mitral/aortic valve replacement will be screened for eligibility.  
38  
39 Inclusion and exclusion criteria are summarised in table 1.  
40  
41  
42  
43  
44  
45  
46  
47  
48  
49  
50  
51  
52  
53  
54  
55  
56  
57  
58  
59  
60

**Table 1.** Inclusion and exclusion criteria

| Inclusion criteria                                                                                                                                                                                                                                                                                                                                                   | Exclusion Criteria                                                                                                                                                                                                                                                                                                                                                                                                                                                                 |
|----------------------------------------------------------------------------------------------------------------------------------------------------------------------------------------------------------------------------------------------------------------------------------------------------------------------------------------------------------------------|------------------------------------------------------------------------------------------------------------------------------------------------------------------------------------------------------------------------------------------------------------------------------------------------------------------------------------------------------------------------------------------------------------------------------------------------------------------------------------|
| <ul style="list-style-type: none"> <li>▪ Coronary artery bypass graft and mitral/aortic valve replacement patients recovering from sternotomy, and eligible for cardiac rehabilitation exercise training in accordance with UK standards (27)</li> <li>▪ Able to provide written informed consent</li> <li>▪ Male or female</li> <li>▪ 18-90 years of age</li> </ul> | <ul style="list-style-type: none"> <li>▪ Serious cardiac arrhythmias</li> <li>▪ Current neurological disorders or previous cerebral vascular accident with residual neurological deficit significant enough to limit exercise</li> <li>▪ Unable to enrol for the full study duration</li> <li>▪ Inability to comply with guidelines for participation in exercise training (28, 29)</li> <li>▪ Significant limiting comorbidities that would prevent full participation</li> </ul> |

### Study Procedures

The participant study pathway is illustrated in figure 1. All cardiac surgery patients will be screened and assessed for eligibility by the research team in consultation with the trial clinical lead. Patients meeting the inclusion criteria will be informed of the study at the first available opportunity. For elective patients, this will take place at either the pre-operative assessment clinic appointment (approximately two weeks prior to surgery), or on admission for surgery. For emergency admissions, patients will be informed of the study early in the post-operative period if it is inappropriate for the study to be discussed pre-surgery. Those who may be interested in participating will be given the patient information leaflet and permitted a minimum of 24 hours to consider their involvement prior to a follow-up phone call or in-patient visit from the research team. Non-English speaking patients will have access to translation services. Informed consent will be obtained on admission for surgery or early in the post-operative period. Baseline data collection will include clinical examination, 6-minute walk test (6-MWT), five times sit-to-stand test (FTSTS), hand grip strength, and isometric leg muscle strength. Instruments to assess anxiety and depression, HR-QoL, and health and

1  
2  
3 social care use, will also be administered. Subsequently, participants will be randomised to  
4  
5 twice weekly CR exercise training, commencing at either two weeks post-surgery (early CR)  
6  
7 or six weeks post-surgery (usual care CR). All measures will be repeated immediately prior  
8  
9 to starting CR (2 or 6 weeks post-surgery), on completion of 8 weeks of CR exercise training  
10  
11 (10 or 14 weeks post-surgery), and at 12 months follow-up. Transport to and from the CR  
12  
13 venues will be offered to patients who are not permitted to drive due to post-surgical Driving  
14  
15 and Vehicle Licencing Agency (DVLA) restrictions.  
16  
17  
18  
19  
20  
21  
22  
23  
24  
25  
26  
27  
28  
29  
30  
31  
32  
33  
34  
35  
36  
37  
38  
39  
40  
41  
42  
43  
44  
45  
46  
47  
48  
49  
50  
51  
52  
53  
54  
55  
56  
57  
58  
59  
60

Figure 1. Study flow chart

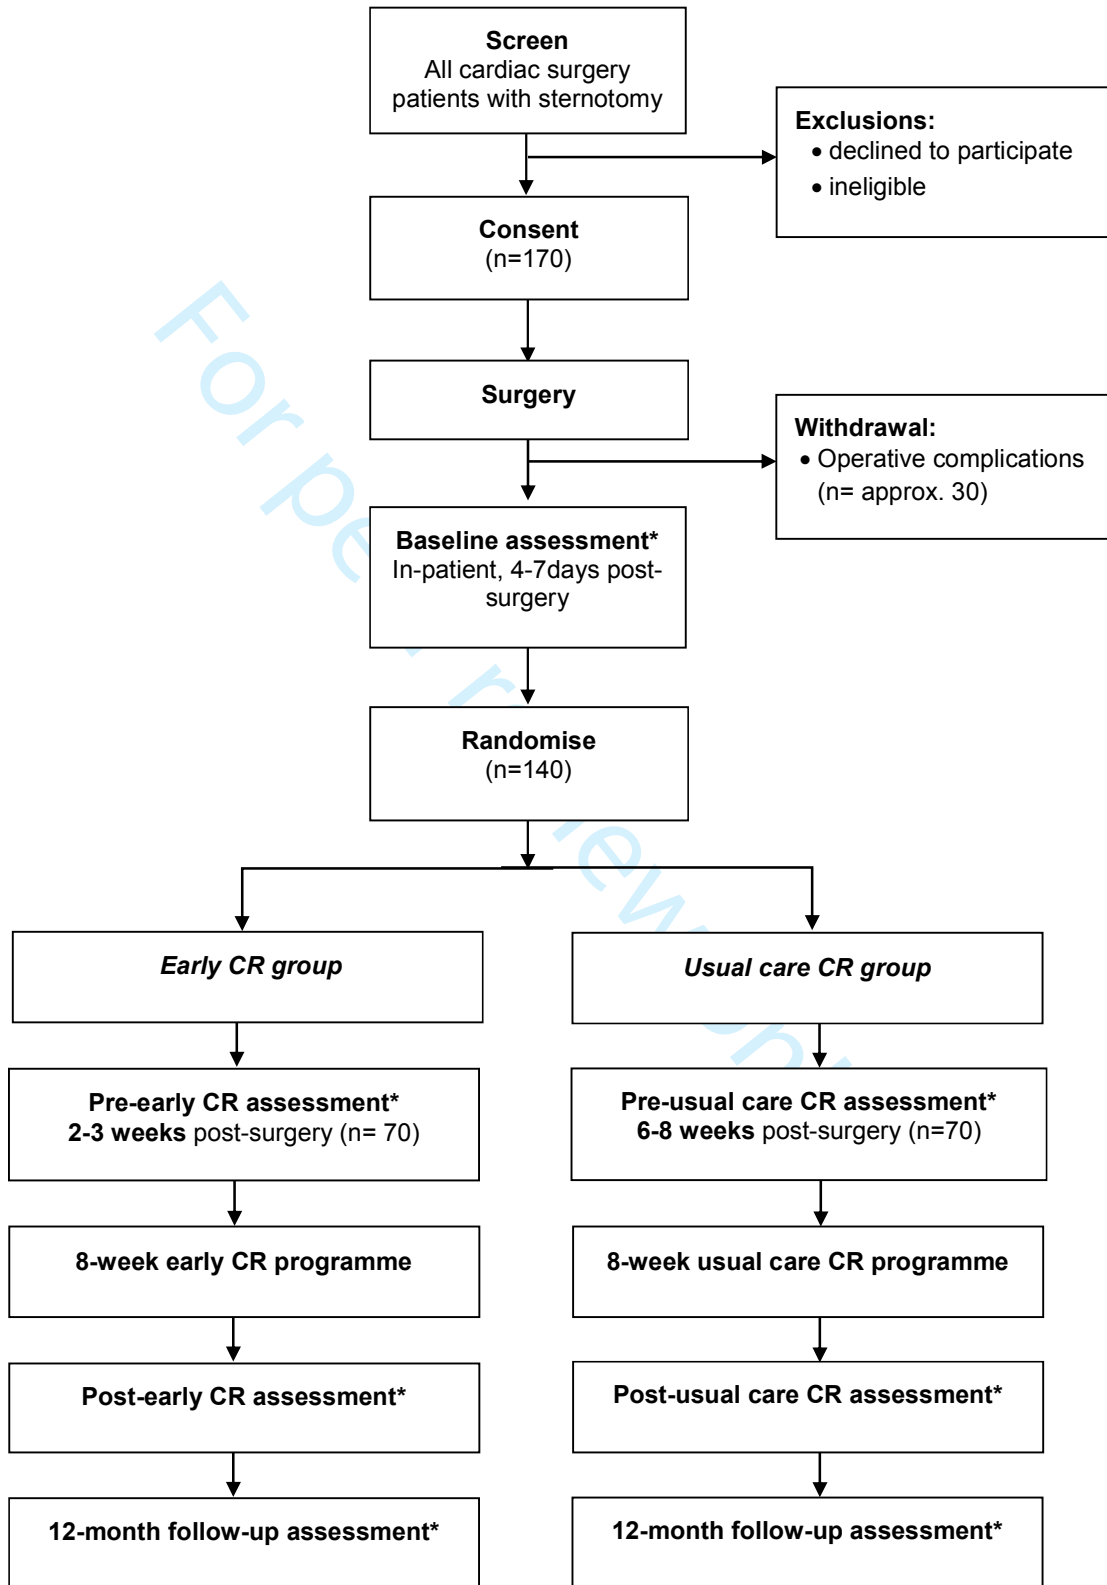

1  
2  
3 UHCW, University Hospitals Coventry & Warwickshire; CR, cardiac rehabilitation; \*Assessment to  
4 include six-minute walk, five times sit-to-stand, grip strength, isometric leg strength, Generalised  
5 Anxiety Disorder assessment (GAD-7), Patient Health Questionnaire (PHQ-9), 12-Item Short Form  
6 Survey (SF-12), 5-Item EuroQol (EQ-5D), client service receipt inventory (CSRI).  
7

## 8 9 **Interventions**

10  
11 Participants in both groups will attend eight weeks of twice-weekly supervised CR exercise  
12 training. The usual care CR group will adhere to current UK standards (BACPR/ACPICR)  
13 (27), commencing exercise training at six weeks post-surgery. In brief, a 15-minute warm-up  
14 will incorporate light cardiovascular and mobility exercises (<40% heart rate reserve, HRR).  
15  
16 The subsequent cardiovascular exercise component will involve moderate intensity interval  
17 training, progressing to 20-40 minutes of continuous cardiovascular exercise at 40-70% HRR.  
18  
19 After a 10-minute cool-down, a full programme of functional muscular strength, flexibility  
20 and proprioception exercises will be undertaken. Care will be taken to ensure upper body  
21 exercises are performed in such a way to avoid sternal and leg wound pain/complications.  
22  
23 Exercise intensity will be prescribed using estimated metabolic equivalents (METs) from the  
24 six-minute walk test (6-MWT). Duration and workload will be increased, as tolerated, based  
25 on heart rate and patient reported rating of perceived exertion (RPE). Written home exercise  
26 guidance will be provided for the six weeks preceding CR enrolment. This guidance has been  
27 produced locally and recommends short bouts (5 minutes) of light-moderate intensity  
28 walking, progressing in duration each week after surgery. In addition, a series of shoulder  
29 mobility exercises will be completed, with the advice to avoid pain and/or undue post-  
30 exercise fatigue.  
31  
32  
33  
34  
35  
36  
37  
38  
39  
40  
41  
42  
43  
44  
45  
46  
47  
48  
49

50  
51 Currently there are no specific exercise prescription guidelines for outpatient CR in patients  
52 who have undergone recent sternotomy (<6 weeks). In the first 2-3 weeks of early CR,  
53 participants will follow a highly individualised exercise programme dictated by their current  
54  
55

level of fitness and post-surgery symptoms/limitations. General guidance will be taken from previous exploratory work (7) aimed at maintaining and increasing mobility and functional strength. Shoulder and chest mobility/strength exercises will be performed when they can be completed with minimal discomfort, and moderate intensity cardiovascular interval training will be gradually introduced. By weeks 2-3 of early CR, participants will progress towards achieving current UK standards (BACPR/ACPICR) (27). Initially, warm-up and cool-down will be specifically tailored to the planned exercises, without adhering to current guidelines. Table 2 provides an overview of the early CR exercise intervention.

**Table 2.** General principles of exercise training for early CR (first 2-3 weeks of CR)

- 
- Highly individualised programme based on current limitations, mobility, fitness and symptoms
  - Shortened warm-up and cool down where required, appropriate to the main exercise component
  - Focus on improvement of posture, mobility, proprioception and functional strength
  - Range of movement dictated by sternal and leg wound pain – pain free exercise advised
  - Low-moderate intensity CV exercise (excluding rowing machine and arm ergometer for 2 weeks) i.e treadmill, cycle ergometer, step-ups
  - Seated exercise where necessary
- 

Extension of the CR programme beyond 8 weeks will be permitted in both groups where two or more consecutive exercise sessions are missed. This is in keeping with standard practice in UK cardiac rehabilitation programmes, and the pragmatic nature of the trial. Sufficient adherence to the study protocol will be determined by the following criteria:

- A minimum of 66% of sessions completed (12 of 18).
- 20 minutes continuous cardiovascular exercise achieved by week four of the CR programme.

**Randomisation and blinding:**

Trial participants will be allocated to early CR or usual care CR, on a 1:1 basis, via block randomisation. The random allocation sequence will be generated by the trial statistician, implemented by an independent CR team member, and compliance will be ensured by UHCW NHS Trust R&D department. Randomisation requests will only be submitted further to completion of all baseline assessments, thus ensuring allocation concealment. At all time points, outcome assessors will be blinded to group allocation, as will the cardiac surgeons. Due to the nature of the trial, it will not be possible to blind the CR staff involved in the delivery of the exercise training interventions. Likewise, participants cannot be blinded.

**Study outcome measures:**

The primary outcome measure is the change in six-minute walk distance at the end of the CR exercise training programme. Secondary outcomes will include measures of 1) functional fitness; 2) anxiety and depression; 3) HR-QoL; 4) compliance and adherence; 5) cost effectiveness, and 6) safety. Table 3 outlines the full schedule of outcome assessments.



**Table 3.** Outcome measures and schedule of assessments

| Measure                   | Instrument                          | Assessment time point                 |
|---------------------------|-------------------------------------|---------------------------------------|
| <b>Primary outcome</b>    |                                     |                                       |
| Walking distance          | Six-minute walk test                | Baseline, start CR, end CR, 12 months |
| <b>Secondary outcomes</b> |                                     |                                       |
| Functional fitness        | Five times sit-to-stand             | Baseline, start CR, end CR, 12 months |
|                           | Handgrip strength                   | Baseline, start CR, end CR, 12 months |
|                           | Isometric leg strength              | Baseline, start CR, end CR, 12 months |
| Anxiety and depression    | GAD-7                               | Baseline, start CR, end CR, 12 months |
|                           | PHQ-9                               | Baseline, start CR, end CR, 12 months |
| HR-QOL                    | SF-12                               | Baseline, start CR, end CR, 12 months |
| Compliance, adherence     | Compliance/adherence/drop-out rates | Continuous                            |
| Cost effectiveness        | EQ-5D                               | Baseline, start CR, end CR, 12 months |
|                           | CSRI                                | Start CR, end CR, 12 months           |
| Safety                    | Adverse event monitoring            | Continuous                            |

CR, cardiac rehabilitation; GAD-7, Generalised Anxiety Disorder assessment; PHQ-9, Patient Health Questionnaire; HR-QoL, health related quality of life; SF-12; 12-Item Short Form Survey; EQ-5D, 5-Item EuroQol; CSRI, client service receipt inventory.

### Primary outcome

The six-minute walk test (6-MWT) is a general measure of functional capacity, and an important prognostic indicator in cardiac surgery populations (30-32). Tests will be conducted in accordance with American Thoracic Society (ATS) guidelines (33). Participants will be instructed to walk as far as possible along a 30m, flat, obstacle free corridor, turning 180 degrees every 30m, in the allotted time of six minutes.

### Functional fitness

The five times sit-to-stand test is often used in clinical and research settings (34) for the measurement of functional lower-extremity muscular strength and power. To complete the FTSTS, the participant will be instructed to stand up and sit down five times as quickly as

1  
2  
3 possible without using their arms for assistance. To ensure good test-retest reliability (35),  
4  
5 standardised foot placement and chair height will be required for each participant. A Jamar  
6  
7 hand dynamometer (Sammons Preston Inc; Bollingbrook, Illinois) will be used to evaluate  
8  
9 hand grip strength in the dominant hand. The position of the participant's arm will adhere to  
10  
11 American Society of Hand Therapists recommendations (36) and participants will be  
12  
13 instructed to maintain maximal grip contraction for 2-5 seconds. Isometric quadriceps  
14  
15 strength will be assessed using a hand held dynamometer (MicroFET2 Torque/Force  
16  
17 indicator, Hoggan Health Industries, Utah, US) (37). Whilst sitting in an elevated chair, with  
18  
19 hips and knees aligned at 90 degrees and the lower leg vertical, participants will exert  
20  
21 maximal force against equal and opposite resistance provided by the assessor.  
22  
23  
24  
25

### 26 **Anxiety, depression and HR-QoL**

27  
28 The seven item Generalised Anxiety Disorder assessment (GAD-7) and nine-item Patient  
29  
30 Health Questionnaire (PHQ-9) are well validated for the assessment of anxiety and  
31  
32 depression (38, 39). Both are widely used as brief diagnostic tools, and measures of severity.  
33  
34 Furthermore, they are routinely recorded in the CR population as part of standard clinical  
35  
36 practice with the results reported in the National Audit of Cardiac Rehabilitation (NACR)  
37  
38 (40). The 12-Item Short Form Survey (SF-12) will be used to evaluate HR-QoL (41). The 12  
39  
40 items of the questionnaire are summarised in two weighted summary scales; mental health  
41  
42 score (MCS) and physical health score (PCS), where lower scores indicate more severe  
43  
44 disability.  
45  
46  
47  
48  
49

### 50 **Compliance and adherence**

51  
52 Compliance and adherence is an important outcome in patients commencing CR exercise  
53  
54 training early post-surgery. Attendance at CR exercise sessions will be closely monitored  
55

1  
2  
3 along with compliance to the prescribed exercise regimen. The number of sessions attended  
4  
5 will be documented, as will the number of sessions successfully completed. Detailed reasons  
6  
7 for incomplete sessions, and drop out, will be recorded where the participant is happy to  
8  
9 provide this information.  
10

### 11 12 13 **Economic evaluation**

14  
15 The EQ-5D questionnaire is a commonly used generic measure of health status. A key feature  
16  
17 is the availability of 'value sets' to weight the EQ-5D health states reported by participants  
18  
19 and populations. The UK value set reported by Dolan (1997) (42) is recommended by NICE  
20  
21 for use in its health technology appraisal process (43). An adapted client service receipt  
22  
23 inventory (CSRI), based on examples in the DIRUM database (44) will be administered at  
24  
25 each time point to capture participant health and social care service use since the last time  
26  
27 point. The cost of delivering early CR and usual care CR (i.e. staff, equipment, facility) will  
28  
29 be recorded throughout the CR programme.  
30  
31  
32  
33  
34

### 35 **Safety**

36  
37 To verify the safety of early CR exercise training, all adverse and serious adverse events  
38  
39 will be carefully monitored, recorded and reported. In line with the principles of Good  
40  
41 Clinical Practice (GCP), the nature and severity of the event, in addition to its potential  
42  
43 association with study participation, will be recorded (45). As with current usual care, the  
44  
45 local CR team, in conjunction with the trial clinician, will decide if participants with  
46  
47 sternal instability or wound infection should be delayed or withdrawn.  
48  
49  
50  
51  
52  
53  
54  
55

### Sample size

The sample size calculation is based on the primary analysis of change in 6-MWT distance post-CR from baseline. A recent systematic review and meta-analysis of over 2500 CR patients (46) showed standard deviations of changes in 6-MWT distances after CR ranging from 57 to 160m, with the pooled standard deviation being 102m. Using a conservative standard deviation of 112m, and assuming that mean changes in 6-MWT distances at the end of CR sessions for both early CR and usual care CR are equal, 60 patients are required in each group (120 in total) to conclude non-inferiority (non-inferiority margin of 60) with 90% power. To allow for approximate dropout rate of 15%, 70 patients will need to be randomised to each group (140 in total).

### Data collection and management

Data will be collected by research staff on case report forms at four time points; baseline, pre-CR, post-CR and 12 months follow up. Local policy and national data protection guidance will be followed with study data anonymously recorded on a bespoke trial database using unique study identification numbers.

### Statistical analysis

The primary analysis will test non-inferiority of the early CR group compared to usual care CR based on changes in 6-MWT distances and will allow a switch to a superiority test. The non-inferiority margin has been set at 60m by the research team, Early CR will be concluded non-inferior to usual care CR if the lower bound of the 95% confidence interval for the mean difference of changes at the end of CR is above 60m. The non-inferiority margin was informed by the fact that a 6-MWT distance of 60m equates to an improvement of approximately 0.5 metabolic equivalents (METs) which leads to a 10% reduction in all-cause

1  
2  
3 mortality (47). If the lower bound of the 95% confidence interval for the mean difference in  
4 changes at the end of CR is above 0, early CR will be concluded superior to usual care CR.  
5  
6 The 95% confidence interval will be based on the t-distribution for the mean difference in  
7 changes between early and usual care CR.  
8  
9  
10

11  
12  
13 In secondary analysis, a linear mixed model will include all 6-MWT distances taken from  
14 each patient at different time points, from baseline (at randomisation) to 14 weeks. Fourteen  
15 weeks is the time point at which CR exercise training will be complete in the usual care CR  
16 group. The model will include terms for group (early or usual care CR), and time (baseline,  
17 pre-CR, post-CR, 12 months). To assess if the trends for early CR and usual care CR are  
18 different, an interaction term for group and time will be included in the linear mixed models.  
19  
20 All data will be summarised and reported in accordance with the Consolidated Standards of  
21 Reporting Trials (CONSORT) guideline (48).  
22  
23  
24  
25  
26  
27  
28  
29  
30  
31  
32

### 33 **Cost effectiveness analysis**

34  
35 Economic evaluation will complement the trial's clinical effectiveness results and inform  
36 decision-making on the commissioning of early CR. The costs and effects for participants in  
37 each group will be compared for the economic evaluation of the intervention. Given that the  
38 primary outcome is measured in natural units, and that the trial lasts 12 months, a cost-  
39 effectiveness (CE) approach will be used to perform the economic evaluation (49). A service  
40 provider perspective will be adopted: a client service receipt inventory (CSRI), administered  
41 pre-CR, post CR and at 12 months, will capture participant health and social care service use  
42 (direct medical and non-medical resources) since the last time point. Resource use, presented  
43 along with cost items in table 4, will be measured as per the recommendations of the Expert  
44 Delphi Consensus Survey (50). The collected resource use and effects data will be handled  
45  
46  
47  
48  
49  
50  
51  
52  
53  
54  
55

with Stata software for statistical analysis of economic evaluation (51). The missing values will be analysed through multiple imputation. The incremental cost and effectiveness ratios will be estimated for early CR and obtained by dividing the incremental cost by the incremental gain in meters from the 6-MWT. Incremental cost and effectiveness ratios and Cost-Effectiveness Acceptability Curves will be used to evaluate if the health benefit generated by early CR is worth any additional cost associated with the intervention. A non-parametric bootstrap technique will be employed to report uncertainty around CE measures. The CE analysis will adhere to the Consolidated Health Economic Evaluation Reporting Standards (CHEERS) statement for the reporting of published economic evaluations (52).

**Table 4.** Resource use and intervention cost measures

| Measure                                                      | Instrument | Assessment time point       |
|--------------------------------------------------------------|------------|-----------------------------|
| <b>Secondary care</b>                                        |            |                             |
| Number and length of admissions (inpatient stay or day case) | CSRI       | Start CR, end CR, 12 months |
| Number of outpatient appointments                            |            |                             |
| <b>Emergency care</b>                                        |            |                             |
| Number of visits to A&E                                      | CSRI       | Start CR, end CR, 12 months |
| Number of admissions to hospital, after A&E                  |            |                             |
| <b>Primary care</b>                                          |            |                             |
| Type of professional seen                                    | CSRI       | Start CR, end CR, 12 months |
| Number and length of visits                                  |            |                             |
| <b>Health care at home</b>                                   |            |                             |
| Type of professional seen                                    | CSRI       | Start CR, end CR, 12 months |
| Number and length of visits                                  |            |                             |
| <b>Medication</b>                                            |            |                             |
| Name/class/dose                                              | CSRI       | Start CR, end CR, 12 months |
| <b>Cost of intervention</b>                                  |            |                             |
| Staff, equipment, facility                                   | Cost diary | Every participant contact   |

CSRI, client service receipt inventory; CR, cardiac rehabilitation; A&E, accident and emergency

### **Patient and public involvement**

Patient and public involvement (PPI) has shaped the study design. Our patient forum endorsed the acceptability of early CR exercise training after surgery, and stressed the importance of returning to work/activities of daily living as soon as possible. Our PPI co-investigator, with lived experience of cardiac surgery, met with several surgical patients, each of whom was sent an overview of the early research protocol. The feedback helped researchers select outcome measures that were relevant to patients' daily experiences and, that crucially, would not unduly inconvenience participants. Multiple, time consuming, invasive outcome measures were considered unethical so early after major surgery.

### **Ethics**

The study protocol v1.0, dated 25<sup>th</sup> January 2017, was approved by the NHS Health Research Authority, West Midlands - Edgbaston Research Ethics Committee on 24<sup>th</sup> February 2017 (17/WM/0057).

### **Dissemination and impact**

Research findings will be presented at scientific meetings and published in peer-reviewed journals. All authors will approve the prepared manuscripts and authorship will be agreed based on international recommendations (ICMJE). The trial is anticipated to influence the direction of future research into CR in sternotomy patients. It is also expected that results from this trial will influence national CR guidelines. As such, findings, relating to both scientific outcomes and CR service provision will be disseminated amongst national governing bodies, and associated organisations, via newsletters and conferences.

1  
2  
3 **Contributions:** SE is the Chief Investigator for the trial, leading on protocol development  
4 and the research ethics application. SE, GL, SW, TB, GM, PK, AK, RP and PB all  
5 contributed fully to the study design. TB (cardiothoracic surgery) PK (statistics), AK (health  
6 economics), provided discipline specific expertise and authored the relevant sections of the  
7 protocol and manuscript. GM prepared the manuscript which was edited by SE, TB, PK and  
8 AK. All authors read and approved the final version of the manuscript.  
9  
10  
11  
12  
13  
14  
15

16  
17  
18  
19  
20 **Funding:** This work was supported by the Jeremy Pilcher Memorial Fund (UHCW), the  
21 Medical & Life Sciences Research Fund, and Atrium Health Ltd, Coventry.  
22  
23  
24  
25  
26  
27  
28

29 **Competing interests:** none.  
30  
31  
32  
33  
34  
35  
36  
37  
38  
39  
40  
41  
42  
43  
44  
45  
46  
47  
48  
49  
50  
51  
52  
53  
54  
55  
56  
57  
58  
59  
60



## References

1. Page RD MJ, Kinsman S. econd National Thoracic Surgery Activity & Outcomes Report on behalf of the Society for Cardiothoracic Surgery in Great Britain & Ireland. Published by Dendrite Clinical SystemsLtd. Henley-on-Thames. ISBN 978-0-9568154-1-5. 2011.
2. King KM, Parry M, Southern D, Faris P, Tsuyuki RT. Women's Recovery from Sternotomy-Extension (WREST-E) study: examining long-term pain and discomfort following sternotomy and their predictors. *Heart*. 2008;94(4):493-7.
3. Kehlet H, Jensen TS, Woolf CJ. Persistent postsurgical pain: risk factors and prevention. *Lancet*. 2006;367(9522):1618-25.
4. Moon MH, Kang JK, Kim HW, Jo KH, Choi SH, Song H. Pain after median sternotomy: collateral damage or mitigatable byproduct? *Thorac Cardiovasc Surg*. 2013;61(3):194-201.
5. Falcoz PE, Chocron S, Stoica L, Kaili D, Puyraveau M, Mercier M, et al. Open heart surgery: one-year self-assessment of quality of life and functional outcome. *Ann Thorac Surg*. 2003;76(5):1598-604; discussion 604.
6. Cahalin LP, Lapier TK, Shaw DK. Sternal Precautions: Is It Time for Change? Precautions versus Restrictions - A Review of Literature and Recommendations for Revision. *Cardiopulm Phys Ther J*. 2011;22(1):5-15.
7. Adams J, Lotshaw A, Exum E, Campbell M, Spranger CB, Beveridge J, et al. An alternative approach to prescribing sternal precautions after median sternotomy, "Keep Your Move in the Tube". *Proc (Bayl Univ Med Cent)*. 2016;29(1):97-100.
8. Anderson L, Thompson DR, Oldridge N, Zwisler AD, Rees K, Martin N, et al. Exercise-based cardiac rehabilitation for coronary heart disease. *Cochrane Database Syst Rev*. 2016(1):CD001800.
9. Barons MJ, Turner S, Parsons N, Griffiths F, Bethell H, Weich S, et al. Fitness predicts long-term survival after a cardiovascular event: a prospective cohort study. *BMJ Open*. 2015;5(10):e007772.
10. Losanoff JE, Richman BW, Jones JW. Disruption and infection of median sternotomy: a comprehensive review. *Eur J Cardiothorac Surg*. 2002;21(5):831-9.
11. Ridderstolpe L, Gill H, Granfeldt H, Ahlfeldt H, Rutberg H. Superficial and deep sternal wound complications: incidence, risk factors and mortality. *Eur J Cardiothorac Surg*. 2001;20(6):1168-75.
12. Adams J, Cline MJ, Hubbard M, McCullough T, Hartman J. A new paradigm for post-cardiac event resistance exercise guidelines. *Am J Cardiol*. 2006;97(2):281-6.
13. Parker R, Adams JL, Ogola G, McBrayer D, Hubbard JM, McCullough TL, et al. Current activity guidelines for CABG patients are too restrictive: comparison of the forces exerted on the median sternotomy during a cough vs. lifting activities combined with valsalva maneuver. *Thorac Cardiovasc Surg*. 2008;56(4):190-4.
14. McGuire DK, Levine BD, Williamson JW, Snell PG, Blomqvist CG, Saltin B, et al. A 30-year follow-up of the Dallas Bedrest and Training Study: I. Effect of age on the cardiovascular response to exercise. *Circulation*. 2001;104(12):1350-7.
15. Perhonen MA, Franco F, Lane LD, Buckley JC, Blomqvist CG, Zerwekh JE, et al. Cardiac atrophy after bed rest and spaceflight. *J Appl Physiol* (1985). 2001;91(2):645-53.
16. Wall BT, Dirks ML, van Loon LJ. Skeletal muscle atrophy during short-term disuse: implications for age-related sarcopenia. *Ageing Res Rev*. 2013;12(4):898-906.
17. Berry SD, Samelson EJ, Bordes M, Broe K, Kiel DP. Survival of aged nursing home residents with hip fracture. *J Gerontol A Biol Sci Med Sci*. 2009;64(7):771-7.
18. Eder B, Hofmann P, von Duvillard SP, Brandt D, Schmid JP, Pokan R, et al. Early 4-week cardiac rehabilitation exercise training in elderly patients after heart surgery. *J Cardiopulm Rehabil Prev*. 2010;30(2):85-92.
19. Hirschhorn AD, Richards DA, Mungovan SF, Morris NR, Adams L. Does the mode of exercise influence recovery of functional capacity in the early postoperative period after coronary artery

- bypass graft surgery? A randomized controlled trial. *Interact Cardiovasc Thorac Surg*. 2012;15(6):995-1003.
20. Hojskov IE, Moons P, Hansen NV, Greve H, Olsen DB, Cour SL, et al. Early physical training and psycho-educational intervention for patients undergoing coronary artery bypass grafting. The SheppHeart randomized 2 x 2 factorial clinical pilot trial. *Eur J Cardiovasc Nurs*. 2016;15(6):425-37.
21. Pack QR, Dudycha KJ, Roschen KP, Thomas RJ, Squires RW. Safety of early enrollment into outpatient cardiac rehabilitation after open heart surgery. *Am J Cardiol*. 2015;115(4):548-52.
22. Fell J, Dale V, Doherty P. Does the timing of cardiac rehabilitation impact fitness outcomes? An observational analysis. *Open Heart*. 2016;3(1):e000369.
23. Marzolini S, Blanchard C, Alter DA, Grace SL, Oh PI. Delays in Referral and Enrolment Are Associated With Mitigated Benefits of Cardiac Rehabilitation After Coronary Artery Bypass Surgery. *Circ Cardiovasc Qual Outcomes*. 2015;8(6):608-20.
24. Johnson DA, Sacrinty MT, Gomadam PS, Mehta HJ, Brady MM, Douglas CJ, et al. Effect of early enrollment on outcomes in cardiac rehabilitation. *Am J Cardiol*. 2014;114(12):1908-11.
25. Russell KL, Holloway TM, Brum M, Caruso V, Chessex C, Grace SL. Cardiac rehabilitation wait times: effect on enrollment. *J Cardiopulm Rehabil Prev*. 2011;31(6):373-7.
26. Chan AW, Tetzlaff JM, Altman DG, Laupacis A, Gotzsche PC, Krleza-Jeric K, et al. SPIRIT 2013 statement: defining standard protocol items for clinical trials. *Ann Intern Med*. 2013;158(3):200-7.
27. ACPICR. Standards for physical activity and exercise in the cardiac population. [http://acpicr.com/sites/default/files/ACPICR\\_Standards\\_2015\\_0.pdf](http://acpicr.com/sites/default/files/ACPICR_Standards_2015_0.pdf). 2015.
28. AACVPR. Guidelines for Cardiac Rehabilitation and Secondary Prevention Programs-4th Edition Champaign, IL: Human Kinetics; 2003.
29. ACSM. Guidelines for exercise testing and prescription. 9th ed. Riverwoods, IL: Lippincott Williams & Wilkins; 2014.
30. Ross RM, Murthy JN, Wollak ID, Jackson AS. The six minute walk test accurately estimates mean peak oxygen uptake. *BMC Pulm Med*. 2010;10:31.
31. Opasich C, De Feo S, Pinna GD, Furgi G, Pedretti R, Scrutinio D, et al. Distance walked in the 6-minute test soon after cardiac surgery: toward an efficient use in the individual patient. *Chest*. 2004;126(6):1796-801.
32. Beatty AL, Schiller NB, Whooley MA. Six-minute walk test as a prognostic tool in stable coronary heart disease: data from the heart and soul study. *Arch Intern Med*. 2012;172(14):1096-102.
33. Holland AE, Spruit MA, Troosters T, Puhan MA, Pepin V, Saey D, et al. An official European Respiratory Society/American Thoracic Society technical standard: field walking tests in chronic respiratory disease. *Eur Respir J*. 2014;44(6):1428-46.
34. Ng S. Balance ability, not muscle strength and exercise endurance, determines the performance of hemiparetic subjects on the timed-sit-to-stand test. *Am J Phys Med Rehabil*. 2010;89(6):497-504.
35. Bohannon RW. Test-retest reliability of the five-repetition sit-to-stand test: a systematic review of the literature involving adults. *J Strength Cond Res*. 2011;25(11):3205-7.
36. Fess EE. Grip strength. In J.S. Casanova (Ed.), *Clinical Assessment Recommendations* (pp. 41–5). 2nd edition. American Society of Hand Therapists, Chicago. 1992.
37. Hansen EM, McCartney CN, Sweeney RS, Palimenio MR, Grindstaff TL. Hand-held Dynamometer Positioning Impacts Discomfort During Quadriceps Strength Testing: A Validity and Reliability Study. *Int J Sports Phys Ther*. 2015;10(1):62-8.
38. Spitzer RL, Kroenke K, Williams JB, Lowe B. A brief measure for assessing generalized anxiety disorder: the GAD-7. *Arch Intern Med*. 2006;166(10):1092-7.
39. Kroenke K. Depression screening is not enough. *Ann Intern Med*. 2001;134(5):418-20.
40. Rehabilitation NAO. Annual Report. York, UK; 2016.

- 1  
2  
3 41. Ware J, Jr., Kosinski M, Keller SD. A 12-Item Short-Form Health Survey: construction of scales  
4 and preliminary tests of reliability and validity. *Med Care*. 1996;34(3):220-33.  
5 42. Dolan P. Modeling valuations for EuroQol health states. *Med Care*. 1997;35(11):1095-108.  
6 43. NICE. Guide to the Methods of Technology Appraisal. National Institute of Health and Clinical  
7 Excellence, London. 2013.  
8 44. Ridyard CH, Hughes DA. Methods for the collection of resource use data within clinical trials:  
9 a systematic review of studies funded by the UK Health Technology Assessment program. *Value*  
10 *Health*. 2010;13(8):867-72.  
11 45. ICH Harmonised Tripartite guideline - guideline for good clinical practice E6 (R1).  
12 [http://www.ich.org/products/guidelines/efficacy/efficacy-single/article/good-clinical-](http://www.ich.org/products/guidelines/efficacy/efficacy-single/article/good-clinical-practice.html)  
13 [practice.html](http://www.ich.org/products/guidelines/efficacy/efficacy-single/article/good-clinical-practice.html). 1996.  
14 46. Wyrwich KW, Tierney WM, Babu AN, Kroenke K, Wolinsky FD. A comparison of clinically  
15 important differences in health-related quality of life for patients with chronic lung disease, asthma,  
16 or heart disease. *Health Serv Res*. 2005;40(2):577-91.  
17 47. Keteyian SJ, Brawner CA, Savage PD, Ehrman JK, Schairer J, Divine G, et al. Peak aerobic  
18 capacity predicts prognosis in patients with coronary heart disease. *Am Heart J*. 2008;156(2):292-  
19 300.  
20 48. Moher D, Hopewell S, Schulz KF, Montori V, Gotzsche PC, Devereaux PJ, et al. CONSORT  
21 2010 explanation and elaboration: updated guidelines for reporting parallel group randomised trials.  
22 *BMJ*. 2010;340:c869.  
23 49. Drummond MF, Sculpher, M.J., Claxton, K., Stoddart, G.L. and Torrance, G.W. *Methods for*  
24 *the economic evaluation of health care programmes*.: Oxford University Press; 2015.  
25 50. Thorn JC, Brookes ST, Ridyard C, Riley R, Hughes DA, Wordsworth S, et al. Core Items for a  
26 Standardized Resource Use Measure (ISRUM): Expert Delphi Consensus Survey. *Value in Health*.  
27 51. Deb P, Norton, E.C., and Manning, W. G. *Health Economeytrics Using Stata*: Stata Press;  
28 2017.  
29 52. Huseureau D, Drummond M, Petrou S, Carswell C, Moher D, Greenberg D, et al. Consolidated  
30 Health Economic Evaluation Reporting Standards (CHEERS) statement. *BMJ*. 2013;346:f1049.  
31  
32  
33  
34  
35  
36  
37  
38  
39  
40  
41  
42  
43  
44  
45  
46  
47  
48  
49  
50  
51  
52  
53  
54  
55  
56  
57  
58  
59  
60

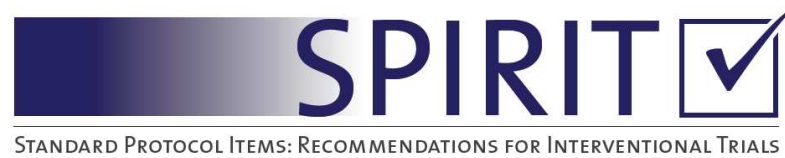

SPIRIT 2013 Checklist: Recommended items to address in a clinical trial protocol and related documents\*

| Section/item                      | Item No | Description                                                                                                                                                                                                                                                                              |                    |
|-----------------------------------|---------|------------------------------------------------------------------------------------------------------------------------------------------------------------------------------------------------------------------------------------------------------------------------------------------|--------------------|
| <b>Administrative information</b> |         |                                                                                                                                                                                                                                                                                          |                    |
| Title                             | 1       | Descriptive title identifying the study design, population, interventions, and, if applicable, trial acronym                                                                                                                                                                             | ___ 1,4 ___        |
| Trial registration                | 2a      | Trial identifier and registry name. If not yet registered, name of intended registry                                                                                                                                                                                                     | ___ 1 ___          |
|                                   | 2b      | All items from the World Health Organization Trial Registration Data Set                                                                                                                                                                                                                 | ___ throughout ___ |
| Protocol version                  | 3       | Date and version identifier                                                                                                                                                                                                                                                              | ___ all ___        |
| Funding                           | 4       | Sources and types of financial, material, and other support                                                                                                                                                                                                                              | ___ n/a ___        |
| Roles and responsibilities        | 5a      | Names, affiliations, and roles of protocol contributors                                                                                                                                                                                                                                  | ___ 3 ___          |
|                                   | 5b      | Name and contact information for the trial sponsor                                                                                                                                                                                                                                       | ___ 4 ___          |
|                                   | 5c      | Role of study sponsor and funders, if any, in study design; collection, management, analysis, and interpretation of data; writing of the report; and the decision to submit the report for publication, including whether they will have ultimate authority over any of these activities | ___ n/a ___        |
|                                   | 5d      | Composition, roles, and responsibilities of the coordinating centre, steering committee, endpoint adjudication committee, data management team, and other individuals or groups overseeing the trial, if applicable (see Item 21a for data monitoring committee)                         | ___ 24-26 ___      |

1  
2  
3  
4  
5  
6  
7  
8  
9  
10  
11  
12  
13  
14  
15  
16  
17  
18  
19  
20  
21  
22  
23  
24  
25  
26  
27  
28  
29  
30  
31  
32  
33  
34  
35  
36  
37  
38  
39  
40  
41  
42  
43  
44  
45  
46  
47

**Introduction**

|                          |    |                                                                                                                                                                                                           |             |
|--------------------------|----|-----------------------------------------------------------------------------------------------------------------------------------------------------------------------------------------------------------|-------------|
| Background and rationale | 6a | Description of research question and justification for undertaking the trial, including summary of relevant studies (published and unpublished) examining benefits and harms for each intervention        | ___12-16___ |
|                          | 6b | Explanation for choice of comparators                                                                                                                                                                     | ___12-16___ |
| Objectives               | 7  | Specific objectives or hypotheses                                                                                                                                                                         | ___13___    |
| Trial design             | 8  | Description of trial design including type of trial (eg, parallel group, crossover, factorial, single group), allocation ratio, and framework (eg, superiority, equivalence, noninferiority, exploratory) | ___4___     |

**Methods: Participants, interventions, and outcomes**

|                      |     |                                                                                                                                                                                                                                                                                                                                                                                |             |
|----------------------|-----|--------------------------------------------------------------------------------------------------------------------------------------------------------------------------------------------------------------------------------------------------------------------------------------------------------------------------------------------------------------------------------|-------------|
| Study setting        | 9   | Description of study settings (eg, community clinic, academic hospital) and list of countries where data will be collected. Reference to where list of study sites can be obtained                                                                                                                                                                                             | ___18___    |
| Eligibility criteria | 10  | Inclusion and exclusion criteria for participants. If applicable, eligibility criteria for study centres and individuals who will perform the interventions (eg, surgeons, psychotherapists)                                                                                                                                                                                   | ___18___    |
| Interventions        | 11a | Interventions for each group with sufficient detail to allow replication, including how and when they will be administered                                                                                                                                                                                                                                                     | ___13___    |
|                      | 11b | Criteria for discontinuing or modifying allocated interventions for a given trial participant (eg, drug dose change in response to harms, participant request, or improving/worsening disease)                                                                                                                                                                                 | ___16,22___ |
|                      | 11c | Strategies to improve adherence to intervention protocols, and any procedures for monitoring adherence (eg, drug tablet return, laboratory tests)                                                                                                                                                                                                                              | ___n/a___   |
|                      | 11d | Relevant concomitant care and interventions that are permitted or prohibited during the trial                                                                                                                                                                                                                                                                                  | ___n/a___   |
| Outcomes             | 12  | Primary, secondary, and other outcomes, including the specific measurement variable (eg, systolic blood pressure), analysis metric (eg, change from baseline, final value, time to event), method of aggregation (eg, median, proportion), and time point for each outcome. Explanation of the clinical relevance of chosen efficacy and harm outcomes is strongly recommended | ___17-21___ |
| Participant timeline | 13  | Time schedule of enrolment, interventions (including any run-ins and washouts), assessments, and visits for participants. A schematic diagram is highly recommended (see Figure)                                                                                                                                                                                               | ___6___     |

1  
2  
3 Sample size 14 Estimated number of participants needed to achieve study objectives and how it was determined, including \_\_\_\_\_23\_\_\_\_\_  
4 clinical and statistical assumptions supporting any sample size calculations

5  
6 Recruitment 15 Strategies for achieving adequate participant enrolment to reach target sample size \_\_\_\_\_n/a\_\_\_\_\_  
7

8 **Methods: Assignment of interventions (for controlled trials)**  
9

10 Allocation:

11  
12 Sequence generation 16a Method of generating the allocation sequence (eg, computer-generated random numbers), and list of any \_\_\_\_\_12\_\_\_\_\_  
13 factors for stratification. To reduce predictability of a random sequence, details of any planned restriction  
14 (eg, blocking) should be provided in a separate document that is unavailable to those who enrol participants  
15 or assign interventions  
16

17 Allocation concealment mechanism 16b Mechanism of implementing the allocation sequence (eg, central telephone; sequentially numbered, \_\_\_\_\_19\_\_\_\_\_  
18 opaque, sealed envelopes), describing any steps to conceal the sequence until interventions are assigned  
19  
20

21 Implementation 16c Who will generate the allocation sequence, who will enrol participants, and who will assign participants to \_\_\_\_\_19\_\_\_\_\_  
22 interventions  
23

24 Blinding (masking) 17a Who will be blinded after assignment to interventions (eg, trial participants, care providers, outcome \_\_\_\_\_19\_\_\_\_\_  
25 assessors, data analysts), and how  
26

27 17b If blinded, circumstances under which unblinding is permissible, and procedure for revealing a participant's \_\_\_\_\_n/a\_\_\_\_\_  
28 allocated intervention during the trial  
29  
30

31 **Methods: Data collection, management, and analysis**  
32

33 Data collection methods 18a Plans for assessment and collection of outcome, baseline, and other trial data, including any related \_\_\_\_\_20\_\_\_\_\_  
34 processes to promote data quality (eg, duplicate measurements, training of assessors) and a description of  
35 study instruments (eg, questionnaires, laboratory tests) along with their reliability and validity, if known.  
36 Reference to where data collection forms can be found, if not in the protocol  
37

38 18b Plans to promote participant retention and complete follow-up, including list of any outcome data to be \_\_\_\_\_22\_\_\_\_\_  
39 collected for participants who discontinue or deviate from intervention protocols  
40  
41  
42  
43  
44

1  
2  
3  
4  
5  
6  
7  
8  
9  
10  
11  
12  
13  
14  
15  
16  
17  
18  
19  
20  
21  
22  
23  
24  
25  
26  
27  
28  
29  
30  
31  
32  
33  
34  
35  
36  
37  
38  
39  
40  
41  
42  
43  
44  
45  
46  
47

Data management 19 Plans for data entry, coding, security, and storage, including any related processes to promote data quality (eg, double data entry; range checks for data values). Reference to where details of data management procedures can be found, if not in the protocol 24

Statistical methods 20a Statistical methods for analysing primary and secondary outcomes. Reference to where other details of the statistical analysis plan can be found, if not in the protocol 22

20b Methods for any additional analyses (eg, subgroup and adjusted analyses) 22

20c Definition of analysis population relating to protocol non-adherence (eg, as randomised analysis), and any statistical methods to handle missing data (eg, multiple imputation) 22

**Methods: Monitoring**

Data monitoring 21a Composition of data monitoring committee (DMC); summary of its role and reporting structure; statement of whether it is independent from the sponsor and competing interests; and reference to where further details about its charter can be found, if not in the protocol. Alternatively, an explanation of why a DMC is not needed N/A

21b Description of any interim analyses and stopping guidelines, including who will have access to these interim results and make the final decision to terminate the trial N/A

Harms 22 Plans for collecting, assessing, reporting, and managing solicited and spontaneously reported adverse events and other unintended effects of trial interventions or trial conduct 26

Auditing 23 Frequency and procedures for auditing trial conduct, if any, and whether the process will be independent from investigators and the sponsor 24-25

**Ethics and dissemination**

Research ethics approval 24 Plans for seeking research ethics committee/institutional review board (REC/IRB) approval 1

Protocol amendments 25 Plans for communicating important protocol modifications (eg, changes to eligibility criteria, outcomes, analyses) to relevant parties (eg, investigators, REC/IRBs, trial participants, trial registries, journals, regulators) X

|    |                               |     |                                                                                                                                                                                                                                                                                     |                        |
|----|-------------------------------|-----|-------------------------------------------------------------------------------------------------------------------------------------------------------------------------------------------------------------------------------------------------------------------------------------|------------------------|
| 1  |                               |     |                                                                                                                                                                                                                                                                                     |                        |
| 2  |                               |     |                                                                                                                                                                                                                                                                                     |                        |
| 3  | Consent or assent             | 26a | Who will obtain informed consent or assent from potential trial participants or authorised surrogates, and how (see Item 32)                                                                                                                                                        | ___19___               |
| 4  |                               |     |                                                                                                                                                                                                                                                                                     |                        |
| 5  |                               |     |                                                                                                                                                                                                                                                                                     |                        |
| 6  |                               | 26b | Additional consent provisions for collection and use of participant data and biological specimens in ancillary studies, if applicable                                                                                                                                               | ___N/A___              |
| 7  |                               |     |                                                                                                                                                                                                                                                                                     |                        |
| 8  | Confidentiality               | 27  | How personal information about potential and enrolled participants will be collected, shared, and maintained in order to protect confidentiality before, during, and after the trial                                                                                                | ___24-26___            |
| 9  |                               |     |                                                                                                                                                                                                                                                                                     |                        |
| 10 |                               |     |                                                                                                                                                                                                                                                                                     |                        |
| 11 | Declaration of interests      | 28  | Financial and other competing interests for principal investigators for the overall trial and each study site                                                                                                                                                                       | ___2___                |
| 12 |                               |     |                                                                                                                                                                                                                                                                                     |                        |
| 13 |                               |     |                                                                                                                                                                                                                                                                                     |                        |
| 14 | Access to data                | 29  | Statement of who will have access to the final trial dataset, and disclosure of contractual agreements that limit such access for investigators                                                                                                                                     | ___26___               |
| 15 |                               |     |                                                                                                                                                                                                                                                                                     |                        |
| 16 |                               |     |                                                                                                                                                                                                                                                                                     |                        |
| 17 | Ancillary and post-trial care | 30  | Provisions, if any, for ancillary and post-trial care, and for compensation to those who suffer harm from trial participation                                                                                                                                                       | ___ethics___           |
| 18 |                               |     |                                                                                                                                                                                                                                                                                     |                        |
| 19 |                               |     |                                                                                                                                                                                                                                                                                     |                        |
| 20 | Dissemination policy          | 31a | Plans for investigators and sponsor to communicate trial results to participants, healthcare professionals, the public, and other relevant groups (eg, via publication, reporting in results databases, or other data sharing arrangements), including any publication restrictions | ___ethics___           |
| 21 |                               |     |                                                                                                                                                                                                                                                                                     |                        |
| 22 |                               |     |                                                                                                                                                                                                                                                                                     |                        |
| 23 |                               |     |                                                                                                                                                                                                                                                                                     |                        |
| 24 |                               |     |                                                                                                                                                                                                                                                                                     |                        |
| 25 |                               | 31b | Authorship eligibility guidelines and any intended use of professional writers                                                                                                                                                                                                      | ___N/A___              |
| 26 |                               |     |                                                                                                                                                                                                                                                                                     |                        |
| 27 |                               | 31c | Plans, if any, for granting public access to the full protocol, participant-level dataset, and statistical code                                                                                                                                                                     | ___N/A___              |
| 28 |                               |     |                                                                                                                                                                                                                                                                                     |                        |
| 29 | <b>Appendices</b>             |     |                                                                                                                                                                                                                                                                                     |                        |
| 30 |                               |     |                                                                                                                                                                                                                                                                                     |                        |
| 31 | Informed consent materials    | 32  | Model consent form and other related documentation given to participants and authorised surrogates                                                                                                                                                                                  | ___Site file/ethics___ |
| 32 |                               |     |                                                                                                                                                                                                                                                                                     |                        |
| 33 |                               |     |                                                                                                                                                                                                                                                                                     |                        |
| 34 | Biological specimens          | 33  | Plans for collection, laboratory evaluation, and storage of biological specimens for genetic or molecular analysis in the current trial and for future use in ancillary studies, if applicable                                                                                      | ___N/A___              |
| 35 |                               |     |                                                                                                                                                                                                                                                                                     |                        |
| 36 |                               |     |                                                                                                                                                                                                                                                                                     |                        |

\*It is strongly recommended that this checklist be read in conjunction with the SPIRIT 2013 Explanation & Elaboration for important clarification on the items. Amendments to the protocol should be tracked and dated. The SPIRIT checklist is copyrighted by the SPIRIT Group under the Creative Commons "[Attribution-NonCommercial-NoDerivs 3.0 Unported](https://creativecommons.org/licenses/by-nc-nd/3.0/)" license.



# BMJ Open

## Early initiation of post-sternotomy cardiac rehabilitation exercise training (SCAR): study protocol for a randomised controlled trial and economic evaluation.

|                                 |                                                                                                                                                                                                                                                                                                                                                                                                                                                                                                                                                                                                                                                                                                                                                                                                                                                                                                                                                                                                          |
|---------------------------------|----------------------------------------------------------------------------------------------------------------------------------------------------------------------------------------------------------------------------------------------------------------------------------------------------------------------------------------------------------------------------------------------------------------------------------------------------------------------------------------------------------------------------------------------------------------------------------------------------------------------------------------------------------------------------------------------------------------------------------------------------------------------------------------------------------------------------------------------------------------------------------------------------------------------------------------------------------------------------------------------------------|
| Journal:                        | <i>BMJ Open</i>                                                                                                                                                                                                                                                                                                                                                                                                                                                                                                                                                                                                                                                                                                                                                                                                                                                                                                                                                                                          |
| Manuscript ID                   | bmjopen-2017-019748.R1                                                                                                                                                                                                                                                                                                                                                                                                                                                                                                                                                                                                                                                                                                                                                                                                                                                                                                                                                                                   |
| Article Type:                   | Protocol                                                                                                                                                                                                                                                                                                                                                                                                                                                                                                                                                                                                                                                                                                                                                                                                                                                                                                                                                                                                 |
| Date Submitted by the Author:   | 02-Jan-2018                                                                                                                                                                                                                                                                                                                                                                                                                                                                                                                                                                                                                                                                                                                                                                                                                                                                                                                                                                                              |
| Complete List of Authors:       | Ennis, Stuart; University Hospitals Coventry and Warwickshire NHS Trust, Cardiac Rehabilitation; Cardiff Metropolitan University, Cardiff Centre for Exercise & Health<br>Lobley, Grace; University Hospitals Coventry and Warwickshire NHS Trust, Cardiac Rehabilitation<br>Worrall, Sandra; University Hospitals Coventry and Warwickshire NHS Trust, Cardiac Rehabilitation<br>Powell, Richard; University Hospitals Coventry and Warwickshire NHS Trust, Cardiac Rehabilitation<br>Kimani, Peter; University of Warwick, Warwick Medical School<br>Khan, Amir; Coventry University, Faculty of Health and Life Sciences<br>Banerjee, Prithwish; University Hospitals Coventry and Warwickshire NHS Trust, Department of Cardiology<br>Barker, Thomas; University Hospitals Coventry and Warwickshire NHS Trust, Cardiothoracic Surgery<br>McGregor, Gordon; University Hospitals Coventry and Warwickshire NHS Trust, Cardiac Rehabilitation; Coventry University, Faculty of Health & Life Sciences |
| <b>Primary Subject Heading</b>: | Cardiovascular medicine                                                                                                                                                                                                                                                                                                                                                                                                                                                                                                                                                                                                                                                                                                                                                                                                                                                                                                                                                                                  |
| Secondary Subject Heading:      | Health economics, Sports and exercise medicine, Surgery, Cardiovascular medicine                                                                                                                                                                                                                                                                                                                                                                                                                                                                                                                                                                                                                                                                                                                                                                                                                                                                                                                         |
| Keywords:                       | Coronary heart disease < CARDIOLOGY, HEALTH ECONOMICS, SPORTS MEDICINE, Cardiac surgery < SURGERY                                                                                                                                                                                                                                                                                                                                                                                                                                                                                                                                                                                                                                                                                                                                                                                                                                                                                                        |
|                                 |                                                                                                                                                                                                                                                                                                                                                                                                                                                                                                                                                                                                                                                                                                                                                                                                                                                                                                                                                                                                          |

SCHOLARONE™  
Manuscripts

1  
2  
3 **Early initiation of post-sternotomy cardiac rehabilitation exercise training (SCAR):**  
4 **study protocol for a randomised controlled trial and economic evaluation.**  
5  
6  
7

8  
9 Stuart Ennis<sup>1,2</sup> Grace Lobley<sup>1</sup>, Sandra Worrall<sup>1</sup>, Richard Powell<sup>1</sup>, Peter K Kimani<sup>3</sup>,  
10 Amir Khan<sup>6</sup>, Prithwish Banerjee<sup>5,6</sup>, Tom Barker<sup>7</sup>, Gordon McGregor<sup>1,6\*</sup>  
11  
12  
13

14  
15 \*Corresponding Author: Department of Cardiac Rehabilitation  
16 Centre for Exercise & Health, Watch Close, Coventry CV1 3LN  
17 **Email:** gordon.mcgregor@uhcw.nhs.uk  
18 **Tel:** 02476 234 570  
19  
20  
21  
22

23 <sup>1</sup> Department of Cardiac Rehabilitation, Centre for Exercise & Health, University Hospital,  
24 Coventry, UK

25 <sup>2</sup> Cardiff Centre for Exercise & Health, Cardiff Metropolitan University, Cardiff, UK

26 <sup>3</sup> Statistics and Epidemiology, Division of Health Sciences, Warwick Medical School,  
27 University of Warwick, Warwick, UK

28 <sup>4</sup> Centre for Health Economics and Medicines Evaluation, Bangor University, Bangor, UK

29 <sup>5</sup> Department of Cardiology, University Hospital, Coventry, UK

30 <sup>6</sup> Health & Life Sciences Research Centre, Coventry University, Coventry, UK

31 <sup>7</sup> Department of Cardiothoracic Surgery, University Hospital, Coventry, UK  
32  
33  
34  
35  
36  
37  
38  
39

40 Key words: Coronary heart disease, coronary artery bypass graft, valve replacement, muscle  
41 atrophy, cardiovascular fitness  
42  
43  
44  
45

46 Word count: 3684  
47  
48  
49  
50  
51  
52  
53  
54  
55

## Abstract

**Introduction:** Current guidelines recommend abstinence from supervised cardiac rehabilitation (CR) exercise training for six weeks post-sternotomy. This practice is not based on empirical evidence, thus imposing potentially unnecessary activity restrictions. Delayed participation in CR exercise training promotes muscle atrophy, reduces cardiovascular fitness, and prolongs recovery. Limited data suggest no detrimental effect of beginning CR exercise training as early as two weeks post-surgery, but randomised controlled trials are yet to confirm this. The purpose of this trial is to compare CR exercise training commenced early (2 weeks post-surgery) with current usual care (6 weeks post-surgery) with a view to informing future CR guidelines for patients recovering from sternotomy.

**Methods and analysis:** In this assessor-blind randomised controlled trial, 170 cardiac surgery patients, recovering from sternotomy, will be assigned to eight weeks of twice weekly supervised CR exercise training commencing at either two weeks (early CR) or 6 weeks (usual care CR) post-surgery. Usual care exercise training will adhere to current UK recommendations. Participants in the early CR group will undertake a highly individualised 2-3 week programme of functional mobility, strength and cardiovascular exercise before progressing to a usual care CR programme. Outcomes will be assessed at baseline (in-patient), pre-CR (2 or 6 weeks post-surgery), post CR (10 or 14 weeks post-surgery) and 12 months. The primary outcome will be change in six-minute walk distance. Secondary outcomes will include measures of functional fitness, quality of life and cost effectiveness.

**Ethics and dissemination:** The study protocol v.1.0, dated 25<sup>th</sup> January 2017 was approved by the NHS Health Research Authority, West Midlands - Edgbaston Research Ethics Committee (17/WM/0057). Recruitment commenced July 2017 and will complete by December 2019. Results will be disseminated via national governing bodies, scientific meetings and peer-reviewed journals.

**Trial registration number:** This study is registered with ClinicalTrials.gov: NCT03223558

**Strengths and limitations of this study:**

- This trial will be conducted in a ‘real world’ community cardiac rehabilitation environment, ensuring a high degree of ecological validity.
- Randomisation and blinding will minimise any potential bias.
- As a limitation, this trial will only be performed in a single centre, thus potentially reducing external validity. Future trials should consider a multi-centre design.

For peer review only

## Introduction

Every year approximately 35,000 patients undergo coronary artery bypass graft (CABG) or aortic/mitral valve replacement surgery in the UK (1). Functional limitation is common and persistent after surgery, mediated by chest wall pain, respiratory complications, fatigue, and anxiety concerning the resumption of daily activities (2-4). At 12 months, previous studies have reported sternal wound pain in nearly 50% of patients (2), and 'unsatisfactory' functional status and quality of life in a third of patients (5). These issues can delay return to work, particularly for those with physically demanding jobs, and the financial consequences can be significant (6, 7).

The benefits of cardiac rehabilitation (CR) exercise training after sternotomy are well documented. A recent Cochrane review reported reduced cardiovascular mortality and hospital readmissions, in addition to improved quality of life (8). Higher fitness levels following CR exercise training also predict better outcomes and lower mortality rates (9). Historically, supervised CR exercise training does not commence until 42 days (6 weeks) after surgery, during which time functional capacity can deteriorate rapidly (8). This guideline emanates from concerns that exercise may slow healing or increase the likelihood of sternal instability and infection (6). These concerns may be justified given that serious complications, such as mediastinitis, are associated with significant mortality (10, 11). To date, however, there is no evidence directly linking early post-operative physical activity to an increased risk of sternal complications (6).

Existing sternal precautions are likely the product of expert opinion and anecdotal evidence. Consequently, practice varies considerably in hospitals and CR centres around the world (7). Sternal precautions, which often lack individualisation, may be overly

1  
2  
3 restrictive, reinforcing fear of activity, and delaying recovery (12, 13). Indeed, long periods  
4 of inactivity, particularly in the elderly, can slow healing and promote muscle atrophy. The  
5 Dallas bed rest studies demonstrated that three weeks of total inactivity had a more  
6 profound impact on exercise capacity than 30 years of aging (14, 15). Cardiac muscle mass  
7 has also been shown to decrease by 8% after six weeks of bed rest (15). Additionally,  
8 inactivity of 10-12 days is sufficient to lead to a loss of skeletal muscle mass of 0.5-0.6%  
9 per day (16). This avoidable muscle wasting is likely to be accelerated in elderly patients,  
10 with potentially significant consequences. The increased risk of falls associated with  
11 muscle atrophy can lead to hip or pelvic fractures, for which the one year mortality rate can  
12 be as high as 40% (17).  
13  
14  
15  
16  
17  
18  
19  
20  
21  
22  
23  
24  
25

26 Evidence for the safety of earlier CR (<6 weeks post-surgery) exercise training in  
27 sternotomy patients is accumulating (18). Studies have shown that in-patient walking and  
28 cycling, 1-7 days post-surgery, is safe and effective (19, 20). Further, no difference was  
29 found in hospital readmissions, infection rates or sternal instability between patients who  
30 started CR exercise training 10 days or 4-7 weeks post-discharge (21). Consequently,  
31 current post-sternotomy activity restrictions may be overly cautious. On the grounds of  
32 safety, surgical patients are commonly advised to avoid lifting more than 5 lbs for 12  
33 weeks after surgery. Adams and colleagues, however, reported that the forces generated by  
34 sneezing and coughing (commonly endured without incident) far exceed that of upper-  
35 body dumbbell exercise and other restricted daily activities such as lifting a coffee pot and  
36 pushing a lawn mower (7, 12). There is little empirical evidence to support universal  
37 restriction of such activities for 12 weeks post sternotomy.  
38  
39  
40  
41  
42  
43  
44  
45  
46  
47  
48  
49  
50  
51  
52  
53  
54  
55  
56  
57  
58  
59  
60

1  
2  
3 A number of studies have highlighted the detrimental effects of delayed enrolment on CR  
4 programmes following cardiac surgery. In the UK, the National Audit for Cardiac  
5 Rehabilitation (NACR), recently reported that, for every 1-day increase in CR wait time,  
6  
7 patients were 1% less likely to improve across all fitness-related measures (22). This finding  
8  
9 is supported by Canadian data which, in an analysis of 6497 CABG patients, found that  
10  
11 longer wait times before CR initiation were associated with lesser improvement in  
12  
13 cardiovascular fitness (23). Attendance on CR programmes is also negatively impacted by  
14  
15 extended waits. Studies have consistently determined that patients are less likely to attend and  
16  
17 adhere to CR, the longer they are required to wait post-cardiac event (24, 25)  
18  
19  
20  
21  
22  
23

24 Evidence to support the earlier initiation of post-sternotomy CR exercise training is,  
25  
26 therefore, apparent in a number of areas. Muscle mass and cardiovascular fitness decline  
27  
28 rapidly with post-surgical inactivity, and when CR programme initiation is delayed,  
29  
30 attendance is lower, and the benefits of exercise training are reduced. Moreover, there is  
31  
32 insufficient evidence to support the current guideline of a six week wait post-surgery, and  
33  
34 safety does not appear to be compromised by earlier CR. Whilst the growing evidence base  
35  
36 for earlier post-sternotomy CR exercise training is relatively compelling, good quality  
37  
38 prospective trials have not been performed. As such, randomised controlled trials are required  
39  
40 to confirm benefit, safety and cost effectiveness. Results of such studies are essential before  
41  
42 national guidelines can be established, allowing policymakers and clinicians to be confident  
43  
44 in altering practice.  
45  
46  
47  
48  
49

50 The early initiation of post-sternotomy cardiac rehabilitation exercise training (SCAR) trial is  
51  
52 a single-centre randomised controlled trial, and economic evaluation, comparing supervised  
53  
54  
55

1  
2  
3 exercise training commenced at two weeks (early CR) with exercise training commenced at  
4  
5 six weeks (usual care CR) post-sternotomy. The main objectives of the trial are:  
6  
7

- 8  
9 1. To assess the effect of early CR on functional fitness.
- 10  
11 2. To assess the effect of early CR on anxiety, depression and health related quality of  
12  
13 life (HR-QoL).
- 14  
15 3. To assess compliance and adherence to early CR.
- 16  
17 4. To conduct a cost-effectiveness analysis of early CR compared to usual care CR.
- 18  
19 5. To assess the safety of early CR  
20  
21  
22  
23

24 In cardiac surgery patients recovering from sternotomy, our primary hypothesis is that early CR  
25  
26 will improve walking distance to the same extent as usual care CR. With limited data on early  
27  
28 CR in this population, particularly in the UK, we propose a holistic investigation including  
29  
30 the following secondary hypotheses: early CR will 1) be as effective as usual care CR in  
31  
32 improving functional fitness; 2) be as effective as usual care CR in improving anxiety and  
33  
34 depression; 3) be as effective as usual care CR in improving HR-QoL; 4) demonstrate  
35  
36 equivalent adherence and compliance to usual care CR; 5) be as cost effective as usual care  
37  
38 CR; 6) be as safe as usual care CR.  
39  
40  
41  
42  
43

#### 44 **Methods and analysis**

45  
46 The SCAR study is an assessor-blind parallel group, randomised controlled trial and  
47  
48 economic evaluation. Participants will be randomly allocated to eight weeks of CR exercise  
49  
50 training commencing at either two weeks (early CR) or six weeks (usual care CR) post-  
51  
52 surgery. Outcomes will be measured at baseline (within 7 days of surgery), start of CR (2 or 6  
53  
54  
55



1  
2  
3 weeks), end of CR (10 or 14 weeks), and at 12 months. Assessors will be blinded to group  
4  
5 allocation. The trial protocol adheres to the Standard Protocol Items: Recommendations for  
6  
7 Clinical Trials (SPIRIT) guidelines (26).  
8  
9

## 10 11 **Setting**

12  
13 The SCAR trial will be conducted at two cardiac rehabilitation venues provided by  
14  
15 University Hospitals Coventry & Warwickshire (UHCW) NHS Trust, 1) Atrium Health,  
16  
17 Centre for Exercise & Health, Coventry, and 2) Hospital of St. Cross, Rugby. Both CR  
18  
19 programmes are certified by the British Association of Cardiovascular Prevention and  
20  
21 Rehabilitation (BACPR), thus, providing the necessary infrastructure and expertise for the  
22  
23 delivery of the SCAR intervention. All cardiac surgery will be performed at University  
24  
25 Hospital, Coventry, a national specialist tertiary cardiac centre. One hundred and seventy  
26  
27 patients will be recruited over a two-year period, commencing July 2017.  
28  
29  
30

## 31 32 **Participants**

33  
34 All patients who are to undergo elective or emergency sternotomy for coronary artery  
35  
36 bypass graft surgery or mitral/aortic valve replacement will be screened for eligibility.  
37  
38  
39 Inclusion and exclusion criteria are summarised in table 1.  
40  
41  
42  
43  
44  
45  
46  
47  
48  
49  
50  
51  
52  
53  
54  
55

**Table 1.** Inclusion and exclusion criteria

| Inclusion criteria                                                                                                                                                                                                                                                                                                                                                   | Exclusion Criteria                                                                                                                                                                                                                                                                                                                                                                                                                                                                 |
|----------------------------------------------------------------------------------------------------------------------------------------------------------------------------------------------------------------------------------------------------------------------------------------------------------------------------------------------------------------------|------------------------------------------------------------------------------------------------------------------------------------------------------------------------------------------------------------------------------------------------------------------------------------------------------------------------------------------------------------------------------------------------------------------------------------------------------------------------------------|
| <ul style="list-style-type: none"> <li>▪ Coronary artery bypass graft and mitral/aortic valve replacement patients recovering from sternotomy, and eligible for cardiac rehabilitation exercise training in accordance with UK standards (27)</li> <li>▪ Able to provide written informed consent</li> <li>▪ Male or female</li> <li>▪ 18-90 years of age</li> </ul> | <ul style="list-style-type: none"> <li>▪ Serious cardiac arrhythmias</li> <li>▪ Current neurological disorders or previous cerebral vascular accident with residual neurological deficit significant enough to limit exercise</li> <li>▪ Unable to enrol for the full study duration</li> <li>▪ Inability to comply with guidelines for participation in exercise training (28, 29)</li> <li>▪ Significant limiting comorbidities that would prevent full participation</li> </ul> |

### Study Procedures

The participant study pathway is illustrated in figure 1. All cardiac surgery patients will be screened and assessed for eligibility by the research team in consultation with the trial clinical lead. Patients meeting the inclusion criteria will be informed of the study at the first available opportunity. For elective patients, this will take place at either the pre-operative assessment clinic appointment (approximately two weeks prior to surgery), or on admission for surgery. For emergency admissions, patients will be informed of the study early in the post-operative period if it is inappropriate for the study to be discussed pre-surgery. Those who may be interested in participating will be given the patient information leaflet and permitted a minimum of 24 hours to consider their involvement prior to a follow-up phone call or in-patient visit from the research team. Non-English speaking patients will have access to translation services. Informed consent will be obtained on admission for surgery or early in the post-operative period. Baseline data collection will include clinical examination, 6-minute walk test (6-MWT), five times sit-to-stand test (FTSTS), hand grip strength, and isometric leg muscle strength. Instruments to assess anxiety and depression, HR-QoL, and health and

1  
2  
3 social care use, will also be administered. Subsequently, participants will be randomised to  
4 twice weekly CR exercise training, commencing at either two weeks post-surgery (early CR)  
5 or six weeks post-surgery (usual care CR). All measures will be repeated immediately prior  
6 to starting CR (2 or 6 weeks post-surgery), on completion of 8 weeks of CR exercise training  
7 (10 or 14 weeks post-surgery), and at 12 months follow-up. Transport to and from the CR  
8 venues will be offered to patients who are not permitted to drive due to post-surgical Driving  
9 and Vehicle Licencing Agency (DVLA) restrictions.  
10  
11  
12  
13  
14  
15  
16  
17  
18  
19

## 20 **Interventions**

21 Participants in both groups will attend eight weeks of twice-weekly supervised CR exercise  
22 training. Both groups will exercise at the same time, in the same facility, with equal levels of  
23 supervision, and each session will last approximately one hour. The usual care CR group will  
24 adhere to current UK standards (BACPR/ACPICR) (27), commencing exercise training at six  
25 weeks post-surgery. In brief, a 15-minute warm-up will incorporate light cardiovascular and  
26 mobility exercises (<40% heart rate reserve, HRR). The subsequent cardiovascular exercise  
27 component (cycle ergometer, rowing ergometer, treadmill, arm ergometer, cross trainer) will  
28 involve 20 minutes of moderate intensity interval training (1-2 minute intervals), progressing  
29 to 20-40 minutes of continuous cardiovascular exercise at 40-70% HRR. After a 10-minute  
30 cool-down, a full programme of functional muscular strength, flexibility and proprioception  
31 exercises will be undertaken (e.g. resistance machines, free weights, multi-plane functional  
32 daily living exercise). Care will be taken to ensure upper body exercises are performed in  
33 such a way to avoid sternal and leg wound pain/complications. Exercise intensity will be  
34 prescribed using estimated metabolic equivalents (METs) from the six-minute walk test (6-  
35 MWT). Duration and workload will be increased, as tolerated, based on heart rate and patient  
36 reported rating of perceived exertion (RPE). Written home exercise guidance will be  
37  
38  
39  
40  
41  
42  
43  
44  
45  
46  
47  
48  
49  
50  
51  
52  
53  
54  
55

1  
2  
3 provided for the six weeks preceding CR enrolment. This guidance has been produced locally  
4 and recommends short bouts (5 minutes) of light-moderate intensity walking, progressing in  
5 duration each week after surgery. In addition, a series of shoulder mobility exercises will be  
6 completed, with the advice to avoid pain and/or undue post-exercise fatigue.  
7  
8  
9

10  
11  
12  
13 Currently there are no specific exercise prescription guidelines for outpatient CR in patients  
14 who have undergone recent sternotomy (<6 weeks). In the first 2-3 weeks of early CR,  
15 participants will follow a highly individualised exercise programme dictated by their current  
16 level of fitness and post-surgery symptoms/limitations. General guidance will be taken from  
17 previous exploratory work (7) aimed at maintaining and increasing mobility and functional  
18 strength. Shoulder and chest mobility/strength exercises will be performed when they can be  
19 completed with minimal discomfort, and moderate intensity cardiovascular interval training  
20 will be gradually introduced. By weeks 2-3 of early CR, participants will progress towards  
21 achieving current UK standards as above (BACPR/ACPICR) (27). Initially, warm-up and  
22 cool-down will be specifically tailored to the planned exercises, without adhering to current  
23 guidelines. Table 2 provides an overview of the early CR exercise intervention.  
24  
25  
26  
27  
28  
29  
30  
31  
32  
33  
34  
35  
36  
37  
38  
39

40 **Table 2.** General principles of exercise training for early CR (first 2-3 weeks of CR)

- 
- 41
  - 42 ▪ Highly individualised programme based on current limitations, mobility, fitness and symptoms
  - 43 ▪ Shortened warm-up and cool down where required, appropriate to the main exercise component
  - 44 ▪ Focus on improvement of posture, mobility, proprioception and functional strength
  - 45 ▪ Range of movement dictated by sternal and leg wound pain – pain free exercise advised
  - 46 ▪ Low-moderate intensity CV exercise (excluding rowing machine and arm ergometer for 2
  - 47 weeks) i.e treadmill, cycle ergometer, step-ups
  - 48 ▪ Seated exercise where necessary
  - 49
  - 50
  - 51
  - 52
- 

53  
54 Extension of the CR programme beyond 8 weeks will be permitted in both groups  
55

1  
2  
3 where two or more consecutive exercise sessions are missed. This is in keeping with  
4  
5 standard practice in UK cardiac rehabilitation programmes, and the pragmatic nature  
6  
7 of the trial. Sufficient adherence to the study protocol will be determined by the  
8  
9 following criteria:

- 10  
11  
12  
13 • A minimum of 66% of sessions completed (12 of 18).
- 14  
15  
16 • 20 minutes continuous cardiovascular exercise achieved by week four of the CR  
17  
18 programme.

### 20 21 **Randomisation and blinding:**

22  
23 Trial participants will be allocated to early CR or usual care CR, on a 1:1 basis, via block  
24  
25 randomisation. The random allocation sequence will be generated by the trial statistician,  
26  
27 implemented by an independent CR team member, and compliance will be ensured by  
28  
29 UHCW NHS Trust R&D department. Randomisation requests will only be submitted further  
30  
31 to completion of all baseline assessments, thus ensuring allocation concealment. At all time  
32  
33 points, outcome assessors will be blinded to group allocation, as will the cardiac surgeons.  
34  
35 Due to the nature of the trial, it will not be possible to blind the CR staff involved in the  
36  
37 delivery of the exercise training interventions. Likewise, participants cannot be blinded.  
38  
39  
40  
41

### 42 43 **Study outcome measures:**

44  
45 The primary outcome measure is the change in six-minute walk distance at the end of the CR  
46  
47 exercise training programme. Secondary outcomes will include measures of 1) functional  
48  
49 fitness; 2) anxiety and depression; 3) HR-QoL; 4) compliance and adherence; 5) cost  
50  
51 effectiveness, and 6) safety. Table 3 outlines the full schedule of outcome assessments.  
52  
53  
54  
55

**Table 3.** Outcome measures and schedule of assessments

| Measure                   | Instrument                          | Assessment time point                 |
|---------------------------|-------------------------------------|---------------------------------------|
| <b>Primary outcome</b>    |                                     |                                       |
| Walking distance          | Six-minute walk test                | Baseline, start CR, end CR, 12 months |
| <b>Secondary outcomes</b> |                                     |                                       |
| Functional fitness        | Five times sit-to-stand             | Baseline, start CR, end CR, 12 months |
|                           | Handgrip strength                   | Baseline, start CR, end CR, 12 months |
|                           | Isometric leg strength              | Baseline, start CR, end CR, 12 months |
| Anxiety and depression    | GAD-7                               | Baseline, start CR, end CR, 12 months |
|                           | PHQ-9                               | Baseline, start CR, end CR, 12 months |
| HR-QOL                    | SF-12                               | Baseline, start CR, end CR, 12 months |
| Compliance, adherence     | Compliance/adherence/drop-out rates | Continuous                            |
| Cost effectiveness        | EQ-5D                               | Baseline, start CR, end CR, 12 months |
|                           | CSRI                                | Start CR, end CR, 12 months           |
| Safety                    | Adverse event monitoring            | Continuous                            |

CR, cardiac rehabilitation; GAD-7, Generalised Anxiety Disorder assessment; PHQ-9, Patient Health Questionnaire; HR-QoL, health related quality of life; SF-12; 12-Item Short Form Survey; EQ-5D, 5-Item EuroQol; CSRI, client service receipt inventory.

### Primary outcome

The six-minute walk test (6-MWT) is a general measure of functional capacity, and an important prognostic indicator in cardiac surgery populations (30-32). Tests will be conducted in accordance with American Thoracic Society (ATS) guidelines (33). Participants will be instructed to walk as far as possible along a 30m, flat, obstacle free corridor, turning 180 degrees every 30m, in the allotted time of six minutes.

### Functional fitness

The five times sit-to-stand test is often used in clinical and research settings (34) for the measurement of functional lower-extremity muscular strength and power. To complete the FTSTS, the participant will be instructed to stand up and sit down five times as quickly as

1  
2  
3 possible without using their arms for assistance. To ensure good test-retest reliability (35),  
4  
5 standardised foot placement and chair height will be required for each participant. A Jamar  
6  
7 hand dynamometer (Sammons Preston Inc; Bollingbrook, Illinois) will be used to evaluate  
8  
9 hand grip strength in the dominant hand. The position of the participant's arm will adhere to  
10  
11 American Society of Hand Therapists recommendations (36) and participants will be  
12  
13 instructed to maintain maximal grip contraction for 2-5 seconds. Isometric quadriceps  
14  
15 strength will be assessed using a hand held dynamometer (MicroFET2 Torque/Force  
16  
17 indicator, Hoggan Health Industries, Utah, US) (37). Whilst sitting in an elevated chair, with  
18  
19 hips and knees aligned at 90 degrees and the lower leg vertical, participants will exert  
20  
21 maximal force against equal and opposite resistance provided by the assessor.  
22  
23  
24  
25

### 26 **Anxiety, depression and HR-QoL**

27  
28 The seven item Generalised Anxiety Disorder assessment (GAD-7) and nine-item Patient  
29  
30 Health Questionnaire (PHQ-9) are well validated for the assessment of anxiety and  
31  
32 depression (38, 39). Both are widely used as brief diagnostic tools, and measures of severity.  
33  
34 Furthermore, they are routinely recorded in the CR population as part of standard clinical  
35  
36 practice with the results reported in the National Audit of Cardiac Rehabilitation (NACR)  
37  
38 (40). The 12-Item Short Form Survey (SF-12) will be used to evaluate HR-QoL (41). The 12  
39  
40 items of the questionnaire are summarised in two weighted summary scales; mental health  
41  
42 score (MCS) and physical health score (PCS), where lower scores indicate more severe  
43  
44 disability.  
45  
46  
47  
48  
49

### 50 **Compliance and adherence**

51  
52 Compliance and adherence is an important outcome in patients commencing CR exercise  
53  
54 training early post-surgery. Attendance at CR exercise sessions will be closely monitored  
55

1  
2  
3 along with compliance to the prescribed exercise regimen. The number of sessions attended  
4  
5 will be documented, as will the number of sessions successfully completed. Detailed reasons  
6  
7 for incomplete sessions, and drop out, will be recorded where the participant is happy to  
8  
9 provide this information.  
10

### 11 12 13 **Economic evaluation**

14  
15 The EQ-5D questionnaire is a commonly used generic measure of health status. A key feature  
16  
17 is the availability of 'value sets' to weight the EQ-5D health states reported by participants  
18  
19 and populations. The UK value set reported by Dolan (1997) (42) is recommended by NICE  
20  
21 for use in its health technology appraisal process (43). An adapted client service receipt  
22  
23 inventory (CSRI), based on examples in the DIRUM database (44) will be administered at  
24  
25 each time point to capture participant health and social care service use since the last time  
26  
27 point. The cost of delivering early CR and usual care CR (i.e. staff, equipment, facility) will  
28  
29 be recorded throughout the CR programme.  
30  
31  
32  
33  
34

### 35 **Safety**

36  
37 To verify the safety of early CR exercise training, all adverse and serious adverse events  
38  
39 will be carefully monitored, recorded and reported. In line with the principles of Good  
40  
41 Clinical Practice (GCP), the nature and severity of the event, in addition to its potential  
42  
43 association with study participation, will be recorded (45). As with current usual care, the  
44  
45 local CR team, in conjunction with the trial clinician, will decide if participants with  
46  
47 sternal instability or wound infection should be delayed or withdrawn.  
48  
49  
50  
51  
52  
53  
54  
55



### Sample size

The sample size calculation is based on the primary analysis of change in 6-MWT distance post-CR from baseline. A recent systematic review and meta-analysis of over 2500 CR patients (46) showed standard deviations of changes in 6-MWT distances after CR ranging from 57 to 160m, with the pooled standard deviation being 102m. Using a conservative standard deviation of 112m, and assuming that mean changes in 6-MWT distances at the end of CR sessions for both early CR and usual care CR are equal, 60 patients are required in each group (120 in total) to conclude non-inferiority (non-inferiority margin of 60 m) with 90% power. To allow for approximate dropout rate of 15%, 70 patients will need to be randomised to each group (140 in total).

### Data collection and management

Data will be collected by research staff on case report forms at four time points; baseline, pre-CR, post-CR and 12 months follow up. Local policy and national data protection guidance will be followed with study data anonymously recorded on a bespoke trial database using unique study identification numbers.

### Statistical analysis

The primary analysis will test non-inferiority of the early CR group compared to usual care CR based on changes in 6-MWT distances. The non-inferiority margin has been set at 60m by the research team. Early CR will be concluded non-inferior to usual care CR if the lower bound of the 95% confidence interval for the mean difference of changes at the end of CR is less than 60m. The non-inferiority margin was informed by the fact that a mean improvement in 6-MWT distance of 60m (in a population with a mean baseline distance of 250m) equates to an improvement of approximately  $1.0 \text{ ml.kg}^{-1}\text{min}^{-1}$  in estimated  $\text{VO}_{2 \text{ peak}}$  (30), which in-

1  
2  
3 turn leads to an approximate 10-15% reduction in all-cause mortality (47). If the lower  
4  
5 bound of the 95% confidence interval for the mean difference in changes at the end of CR is  
6  
7 above 0, early CR will be concluded superior to usual care CR. The 95% confidence interval  
8  
9 will be based on the t-distribution for the mean difference in changes between early and usual  
10  
11 care CR.  
12  
13  
14

15  
16 In secondary analysis, a linear mixed model will include all 6-MWT distances taken from  
17  
18 each patient at different time points, from baseline (at randomisation) to 14 weeks. Fourteen  
19  
20 weeks is the time point at which CR exercise training will be complete in the usual care CR  
21  
22 group. The model will include terms for group (early or usual care CR), and time (baseline,  
23  
24 pre-CR, post-CR, 12 months). To assess if the trends for early CR and usual care CR are  
25  
26 different, an interaction term for group and time will be included in the linear mixed models.  
27  
28 All data will be summarised and reported in accordance with the Consolidated Standards of  
29  
30 Reporting Trials (CONSORT) guideline (48).  
31  
32  
33  
34

### 35 **Economic evaluation**

36  
37 Economic evaluation will complement the trial's clinical effectiveness results and inform  
38  
39 decision-making on the commissioning of early CR. We will conduct a cost-effectiveness  
40  
41 analysis to estimate cost per unit of health gains due to early CR compared to usual CR (e.g.  
42  
43 cost per additional distance covered in the 6-MWT). The costs and effects for participants in  
44  
45 each group will be compared for the economic evaluation of the intervention. Given that the  
46  
47 primary outcome is measured in natural units, and that the trial lasts 12 months, a cost-  
48  
49 effectiveness (CE) approach is preferred for the economic evaluation (49). A service provider  
50  
51 perspective will be adopted: a client service receipt inventory (CSRI), administered pre-CR,  
52  
53 post CR and at 12 months, will collect data for participants' health and social care resource  
54  
55

1  
2  
3 use (direct medical and non-medical resources) since the last data collection point. Health  
4  
5 outcome measures for effectiveness, reported in table 3, and economic resource use, listed in  
6  
7 table 4, will be measured as per the recommendations of the Expert Delphi Consensus Survey  
8  
9 (50). The collected resource use and effects data will be handled with Stata software for  
10  
11 statistical analysis of economic evaluation (51). The missing values will be analysed through  
12  
13 multiple imputation. The incremental cost and effectiveness ratios will be estimated for early  
14  
15 CR and obtained by dividing the incremental cost by the incremental gain in meters from the  
16  
17 6-MWT. Incremental cost and effectiveness ratios and Cost-Effectiveness Acceptability  
18  
19 Curves will be used to evaluate if the health benefit generated by early CR is worth any  
20  
21 additional cost associated with the intervention. A non-parametric bootstrap technique will be  
22  
23 employed to report uncertainty around CE measures. The CE analysis will adhere to the  
24  
25 Consolidated Health Economic Evaluation Reporting Standards (CHEERS) statement for the  
26  
27 reporting of published economic evaluations (52).  
28  
29  
30  
31  
32  
33  
34  
35  
36  
37  
38  
39  
40  
41  
42  
43  
44  
45  
46  
47  
48  
49  
50  
51  
52  
53  
54  
55  
56  
57  
58  
59  
60

**Table 4.** Resource use and intervention cost measures

| Measure                                                      | Instrument | Assessment time point       |
|--------------------------------------------------------------|------------|-----------------------------|
| <b>Secondary care</b>                                        |            |                             |
| Number and length of admissions (inpatient stay or day case) | CSRI       | Start CR, end CR, 12 months |
| Number of outpatient appointments                            |            |                             |
| <b>Emergency care</b>                                        |            |                             |
| Number of visits to A&E                                      | CSRI       | Start CR, end CR, 12 months |
| Number of admissions to hospital, after A&E                  |            |                             |
| <b>Primary care</b>                                          |            |                             |
| Type of professional seen                                    | CSRI       | Start CR, end CR, 12 months |
| Number and length of visits                                  |            |                             |
| <b>Health care at home</b>                                   |            |                             |
| Type of professional seen                                    | CSRI       | Start CR, end CR, 12 months |
| Number and length of visits                                  |            |                             |
| <b>Medication</b>                                            |            |                             |
| Name/class/dose                                              | CSRI       | Start CR, end CR, 12 months |
| <b>Cost of intervention</b>                                  |            |                             |
| Staff, equipment, facility                                   | Cost diary | Every participant contact   |

CSRI, client service receipt inventory; CR, cardiac rehabilitation; A&E, accident and emergency

### Patient and public involvement

Patient and public involvement (PPI) has shaped the study design. Our patient forum endorsed the acceptability of early CR exercise training after surgery, and stressed the importance of returning to work/activities of daily living as soon as possible. Our PPI co-investigator, with lived experience of cardiac surgery, met with several surgical patients, each of whom was sent an overview of the early research protocol. The feedback helped researchers select outcome measures that were relevant to patients' daily experiences and, that crucially, would not unduly inconvenience participants. Multiple, time consuming, invasive outcome measures were considered unethical so early after major surgery.

## Ethics

The study protocol v1.0, dated 25<sup>th</sup> January 2017, was approved by the NHS Health Research Authority, West Midlands - Edgbaston Research Ethics Committee on 24<sup>th</sup> February 2017 (17/WM/0057).

## Dissemination and impact

Research findings will be presented at scientific meetings and published in peer-reviewed journals. All authors will approve the prepared manuscripts and authorship will be agreed based on international recommendations (ICMJE). The trial is anticipated to influence the direction of future research into CR in sternotomy patients. It is also expected that results from this trial will influence national CR guidelines. As such, findings, relating to both scientific outcomes and CR service provision will be disseminated amongst national governing bodies, and associated organisations, via newsletters and conferences.

## Figure 1. Trial flow chart

UHCW, University Hospitals Coventry & Warwickshire; CR, cardiac rehabilitation;

\*Assessment to include six-minute walk, five times sit-to-stand, grip strength, isometric leg strength, Generalised Anxiety Disorder assessment (GAD-7), Patient Health Questionnaire (PHQ-9), 12-Item Short Form Survey (SF-12), 5-Item EuroQol (EQ-5D), client service receipt inventory (CSRI).

1  
2  
3 **Contributions:** SE is the Chief Investigator for the trial, leading on protocol development  
4 and the research ethics application. SE, GL, SW, TB, GM, PK, AK, RP and PB all  
5 contributed fully to the study design. TB (cardiothoracic surgery) PK (statistics), AK (health  
6 economics), provided discipline specific expertise and authored the relevant sections of the  
7 protocol and manuscript. GM prepared the manuscript which was edited by SE, TB, PK and  
8 AK. All authors read and approved the final version of the manuscript.  
9  
10  
11  
12  
13  
14  
15  
16  
17  
18  
19

20 **Funding:** This work was supported by the Jeremy Pilcher Memorial Fund (UHCW), the  
21 Medical & Life Sciences Research Fund, and Atrium Health Ltd, Coventry.  
22  
23  
24  
25  
26  
27  
28

29 **Competing interests:** none.  
30  
31  
32  
33  
34  
35  
36  
37  
38  
39  
40  
41  
42  
43  
44  
45  
46  
47  
48  
49  
50  
51  
52  
53  
54  
55  
56  
57  
58  
59  
60

## References

1. Page RD MJ, Kinsman S. econd National Thoracic Surgery Activity & Outcomes Report on behalf of the Society for Cardiothoracic Surgery in Great Britain & Ireland. Published by Dendrite Clinical SystemsLtd. Henley-on-Thames. ISBN 978-0-9568154-1-5. 2011.
2. King KM, Parry M, Southern D, Faris P, Tsuyuki RT. Women's Recovery from Sternotomy-Extension (WREST-E) study: examining long-term pain and discomfort following sternotomy and their predictors. *Heart*. 2008;94(4):493-7.
3. Kehlet H, Jensen TS, Woolf CJ. Persistent postsurgical pain: risk factors and prevention. *Lancet*. 2006;367(9522):1618-25.
4. Moon MH, Kang JK, Kim HW, Jo KH, Choi SH, Song H. Pain after median sternotomy: collateral damage or mitigatable byproduct? *Thorac Cardiovasc Surg*. 2013;61(3):194-201.
5. Falcoz PE, Chocron S, Stoica L, Kaili D, Puyraveau M, Mercier M, et al. Open heart surgery: one-year self-assessment of quality of life and functional outcome. *Ann Thorac Surg*. 2003;76(5):1598-604; discussion 604.
6. Cahalin LP, Lapier TK, Shaw DK. Sternal Precautions: Is It Time for Change? Precautions versus Restrictions - A Review of Literature and Recommendations for Revision. *Cardiopulm Phys Ther J*. 2011;22(1):5-15.
7. Adams J, Lotshaw A, Exum E, Campbell M, Spranger CB, Beveridge J, et al. An alternative approach to prescribing sternal precautions after median sternotomy, "Keep Your Move in the Tube". *Proc (Bayl Univ Med Cent)*. 2016;29(1):97-100.
8. Anderson L, Thompson DR, Oldridge N, Zwisler AD, Rees K, Martin N, et al. Exercise-based cardiac rehabilitation for coronary heart disease. *Cochrane Database Syst Rev*. 2016(1):CD001800.
9. Barons MJ, Turner S, Parsons N, Griffiths F, Bethell H, Weich S, et al. Fitness predicts long-term survival after a cardiovascular event: a prospective cohort study. *BMJ Open*. 2015;5(10):e007772.
10. Losanoff JE, Richman BW, Jones JW. Disruption and infection of median sternotomy: a comprehensive review. *Eur J Cardiothorac Surg*. 2002;21(5):831-9.
11. Ridderstolpe L, Gill H, Granfeldt H, Ahlfeldt H, Rutberg H. Superficial and deep sternal wound complications: incidence, risk factors and mortality. *Eur J Cardiothorac Surg*. 2001;20(6):1168-75.
12. Adams J, Cline MJ, Hubbard M, McCullough T, Hartman J. A new paradigm for post-cardiac event resistance exercise guidelines. *Am J Cardiol*. 2006;97(2):281-6.
13. Parker R, Adams JL, Ogola G, McBrayer D, Hubbard JM, McCullough TL, et al. Current activity guidelines for CABG patients are too restrictive: comparison of the forces exerted on the median sternotomy during a cough vs. lifting activities combined with valsalva maneuver. *Thorac Cardiovasc Surg*. 2008;56(4):190-4.
14. McGuire DK, Levine BD, Williamson JW, Snell PG, Blomqvist CG, Saltin B, et al. A 30-year follow-up of the Dallas Bedrest and Training Study: I. Effect of age on the cardiovascular response to exercise. *Circulation*. 2001;104(12):1350-7.
15. Perhonen MA, Franco F, Lane LD, Buckley JC, Blomqvist CG, Zerwekh JE, et al. Cardiac atrophy after bed rest and spaceflight. *J Appl Physiol* (1985). 2001;91(2):645-53.
16. Wall BT, Dirks ML, van Loon LJ. Skeletal muscle atrophy during short-term disuse: implications for age-related sarcopenia. *Ageing Res Rev*. 2013;12(4):898-906.
17. Berry SD, Samelson EJ, Bordes M, Broe K, Kiel DP. Survival of aged nursing home residents with hip fracture. *J Gerontol A Biol Sci Med Sci*. 2009;64(7):771-7.
18. Eder B, Hofmann P, von Duvillard SP, Brandt D, Schmid JP, Pokan R, et al. Early 4-week cardiac rehabilitation exercise training in elderly patients after heart surgery. *J Cardiopulm Rehabil Prev*. 2010;30(2):85-92.
19. Hirschhorn AD, Richards DA, Mungovan SF, Morris NR, Adams L. Does the mode of exercise influence recovery of functional capacity in the early postoperative period after coronary artery

- bypass graft surgery? A randomized controlled trial. *Interact Cardiovasc Thorac Surg*. 2012;15(6):995-1003.
20. Hojskov IE, Moons P, Hansen NV, Greve H, Olsen DB, Cour SL, et al. Early physical training and psycho-educational intervention for patients undergoing coronary artery bypass grafting. The SheppHeart randomized 2 x 2 factorial clinical pilot trial. *Eur J Cardiovasc Nurs*. 2016;15(6):425-37.
21. Pack QR, Dudycha KJ, Roschen KP, Thomas RJ, Squires RW. Safety of early enrollment into outpatient cardiac rehabilitation after open heart surgery. *Am J Cardiol*. 2015;115(4):548-52.
22. Fell J, Dale V, Doherty P. Does the timing of cardiac rehabilitation impact fitness outcomes? An observational analysis. *Open Heart*. 2016;3(1):e000369.
23. Marzolini S, Blanchard C, Alter DA, Grace SL, Oh PI. Delays in Referral and Enrolment Are Associated With Mitigated Benefits of Cardiac Rehabilitation After Coronary Artery Bypass Surgery. *Circ Cardiovasc Qual Outcomes*. 2015;8(6):608-20.
24. Johnson DA, Sacrinty MT, Gomadam PS, Mehta HJ, Brady MM, Douglas CJ, et al. Effect of early enrollment on outcomes in cardiac rehabilitation. *Am J Cardiol*. 2014;114(12):1908-11.
25. Russell KL, Holloway TM, Brum M, Caruso V, Chessex C, Grace SL. Cardiac rehabilitation wait times: effect on enrollment. *J Cardiopulm Rehabil Prev*. 2011;31(6):373-7.
26. Chan AW, Tetzlaff JM, Altman DG, Laupacis A, Gotzsche PC, Krleza-Jeric K, et al. SPIRIT 2013 statement: defining standard protocol items for clinical trials. *Ann Intern Med*. 2013;158(3):200-7.
27. ACPICR. Standards for physical activity and exercise in the cardiac population. [http://acpicr.com/sites/default/files/ACPICR\\_Standards\\_2015\\_0.pdf](http://acpicr.com/sites/default/files/ACPICR_Standards_2015_0.pdf). 2015.
28. AACVPR. Guidelines for Cardiac Rehabilitation and Secondary Prevention Programs-4th Edition Champaign, IL: Human Kinetics; 2003.
29. ACSM. Guidelines for exercise testing and prescription. 9th ed. Riverwoods, IL: Lippincott Williams & Wilkins; 2014.
30. Ross RM, Murthy JN, Wollak ID, Jackson AS. The six minute walk test accurately estimates mean peak oxygen uptake. *BMC Pulm Med*. 2010;10:31.
31. Opasich C, De Feo S, Pinna GD, Furgi G, Pedretti R, Scrutinio D, et al. Distance walked in the 6-minute test soon after cardiac surgery: toward an efficient use in the individual patient. *Chest*. 2004;126(6):1796-801.
32. Beatty AL, Schiller NB, Whooley MA. Six-minute walk test as a prognostic tool in stable coronary heart disease: data from the heart and soul study. *Arch Intern Med*. 2012;172(14):1096-102.
33. Holland AE, Spruit MA, Troosters T, Puhan MA, Pepin V, Saey D, et al. An official European Respiratory Society/American Thoracic Society technical standard: field walking tests in chronic respiratory disease. *Eur Respir J*. 2014;44(6):1428-46.
34. Ng S. Balance ability, not muscle strength and exercise endurance, determines the performance of hemiparetic subjects on the timed-sit-to-stand test. *Am J Phys Med Rehabil*. 2010;89(6):497-504.
35. Bohannon RW. Test-retest reliability of the five-repetition sit-to-stand test: a systematic review of the literature involving adults. *J Strength Cond Res*. 2011;25(11):3205-7.
36. Fess EE. Grip strength. In J.S. Casanova (Ed.), *Clinical Assessment Recommendations* (pp. 41–5). 2nd edition. American Society of Hand Therapists, Chicago. 1992.
37. Hansen EM, McCartney CN, Sweeney RS, Palimenio MR, Grindstaff TL. Hand-held Dynamometer Positioning Impacts Discomfort During Quadriceps Strength Testing: A Validity and Reliability Study. *Int J Sports Phys Ther*. 2015;10(1):62-8.
38. Spitzer RL, Kroenke K, Williams JB, Lowe B. A brief measure for assessing generalized anxiety disorder: the GAD-7. *Arch Intern Med*. 2006;166(10):1092-7.
39. Kroenke K. Depression screening is not enough. *Ann Intern Med*. 2001;134(5):418-20.
40. Rehabilitation NAO. Annual Report. York, UK; 2016.



- 1  
2  
3 41. Ware J, Jr., Kosinski M, Keller SD. A 12-Item Short-Form Health Survey: construction of scales  
4 and preliminary tests of reliability and validity. *Med Care*. 1996;34(3):220-33.
- 5 42. Dolan P. Modeling valuations for EuroQol health states. *Med Care*. 1997;35(11):1095-108.
- 6 43. NICE. Guide to the Methods of Technology Appraisal. National Institute of Health and Clinical  
7 Excellence, London. 2013.
- 8 44. Ridyard CH, Hughes DA. Methods for the collection of resource use data within clinical trials:  
9 a systematic review of studies funded by the UK Health Technology Assessment program. *Value*  
10 *Health*. 2010;13(8):867-72.
- 11 45. ICH Harmonised Tripartite guideline - guideline for good clinical practice E6 (R1).  
12 [http://www.ich.org/products/guidelines/efficacy/efficacy-single/article/good-clinical-](http://www.ich.org/products/guidelines/efficacy/efficacy-single/article/good-clinical-practice.html)  
13 [practice.html](http://www.ich.org/products/guidelines/efficacy/efficacy-single/article/good-clinical-practice.html). 1996.
- 14 46. Wyrwich KW, Tierney WM, Babu AN, Kroenke K, Wolinsky FD. A comparison of clinically  
15 important differences in health-related quality of life for patients with chronic lung disease, asthma,  
16 or heart disease. *Health Serv Res*. 2005;40(2):577-91.
- 17 47. Keteyian SJ, Brawner CA, Savage PD, Ehrman JK, Schairer J, Divine G, et al. Peak aerobic  
18 capacity predicts prognosis in patients with coronary heart disease. *Am Heart J*. 2008;156(2):292-  
19 300.
- 20 48. Moher D, Hopewell S, Schulz KF, Montori V, Gotzsche PC, Devereaux PJ, et al. CONSORT  
21 2010 explanation and elaboration: updated guidelines for reporting parallel group randomised trials.  
22 *BMJ*. 2010;340:c869.
- 23 49. Drummond MF, Sculpher, M.J., Claxton, K., Stoddart, G.L. and Torrance, G.W. Methods for  
24 the economic evaluation of health care programmes.: Oxford University Press; 2015.
- 25 50. Thorn JC, Brookes ST, Ridyard C, Riley R, Hughes DA, Wordsworth S, et al. Core Items for a  
26 Standardized Resource Use Measure (ISRUM): Expert Delphi Consensus Survey. *Value in Health*.
- 27 51. Deb P, Norton, E.C., and Manning, W. G. Health Economeytrics Using Stata: Stata Press;  
28 2017.
- 29 52. Huseureau D, Drummond M, Petrou S, Carswell C, Moher D, Greenberg D, et al. Consolidated  
30 Health Economic Evaluation Reporting Standards (CHEERS) statement. *BMJ*. 2013;346:f1049.
- 31  
32  
33  
34  
35  
36  
37  
38  
39  
40  
41  
42  
43  
44  
45  
46  
47  
48  
49  
50  
51  
52  
53  
54  
55  
56  
57  
58  
59  
60

1  
2  
3  
4  
5  
6  
7  
8  
9  
10  
11  
12  
13  
14  
15  
16  
17  
18  
19  
20  
21  
22  
23  
24  
25  
26  
27  
28  
29  
30  
31  
32  
33  
34  
35  
36  
37  
38  
39  
40  
41  
42  
43  
44  
45  
46  
47  
48  
49  
50  
51  
52  
53  
54  
55  
56  
57  
58  
59  
60

Figure 1. Trial flow chart

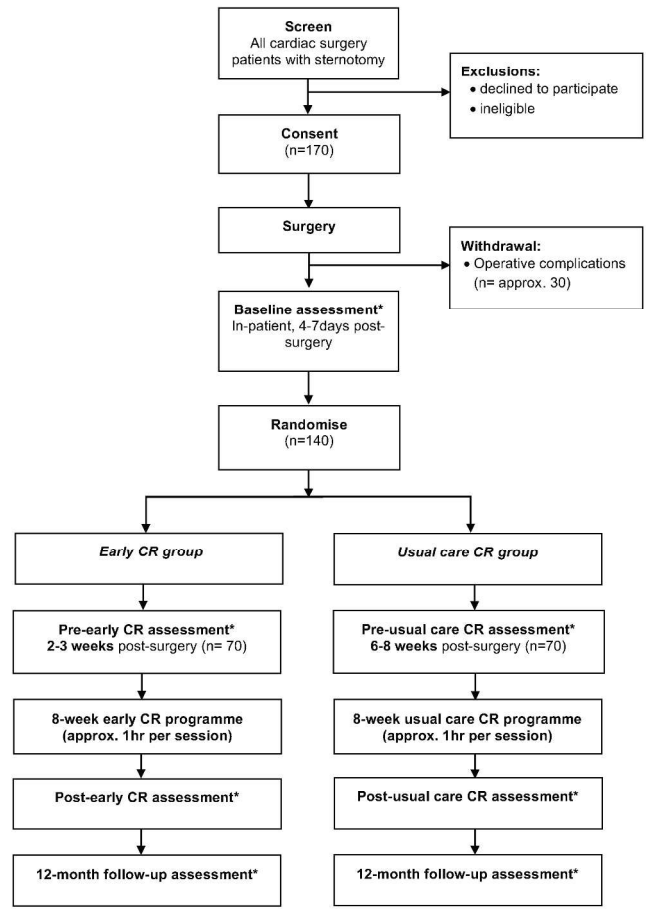

210x297mm (300 x 300 DPI)



SPIRIT 2013 Checklist: Recommended items to address in a clinical trial protocol and related documents\*

| Section/item                      | Item No | Description                                                                                                                                                                                                                                                                              |                    |
|-----------------------------------|---------|------------------------------------------------------------------------------------------------------------------------------------------------------------------------------------------------------------------------------------------------------------------------------------------|--------------------|
| <b>Administrative information</b> |         |                                                                                                                                                                                                                                                                                          |                    |
| Title                             | 1       | Descriptive title identifying the study design, population, interventions, and, if applicable, trial acronym                                                                                                                                                                             | ___ 1,4 ___        |
| Trial registration                | 2a      | Trial identifier and registry name. If not yet registered, name of intended registry                                                                                                                                                                                                     | ___ 1 ___          |
|                                   | 2b      | All items from the World Health Organization Trial Registration Data Set                                                                                                                                                                                                                 | ___ throughout ___ |
| Protocol version                  | 3       | Date and version identifier                                                                                                                                                                                                                                                              | ___ all ___        |
| Funding                           | 4       | Sources and types of financial, material, and other support                                                                                                                                                                                                                              | ___ n/a ___        |
| Roles and responsibilities        | 5a      | Names, affiliations, and roles of protocol contributors                                                                                                                                                                                                                                  | ___ 3 ___          |
|                                   | 5b      | Name and contact information for the trial sponsor                                                                                                                                                                                                                                       | ___ 4 ___          |
|                                   | 5c      | Role of study sponsor and funders, if any, in study design; collection, management, analysis, and interpretation of data; writing of the report; and the decision to submit the report for publication, including whether they will have ultimate authority over any of these activities | ___ n/a ___        |
|                                   | 5d      | Composition, roles, and responsibilities of the coordinating centre, steering committee, endpoint adjudication committee, data management team, and other individuals or groups overseeing the trial, if applicable (see Item 21a for data monitoring committee)                         | ___ 24-26 ___      |

1  
2  
3  
4  
5  
6  
7  
8  
9  
10  
11  
12  
13  
14  
15  
16  
17  
18  
19  
20  
21  
22  
23  
24  
25  
26  
27  
28  
29  
30  
31  
32  
33  
34  
35  
36  
37  
38  
39  
40  
41  
42  
43  
44  
45  
46  
47

**Introduction**

|                          |    |                                                                                                                                                                                                           |             |
|--------------------------|----|-----------------------------------------------------------------------------------------------------------------------------------------------------------------------------------------------------------|-------------|
| Background and rationale | 6a | Description of research question and justification for undertaking the trial, including summary of relevant studies (published and unpublished) examining benefits and harms for each intervention        | ___12-16___ |
|                          | 6b | Explanation for choice of comparators                                                                                                                                                                     | ___12-16___ |
| Objectives               | 7  | Specific objectives or hypotheses                                                                                                                                                                         | ___13___    |
| Trial design             | 8  | Description of trial design including type of trial (eg, parallel group, crossover, factorial, single group), allocation ratio, and framework (eg, superiority, equivalence, noninferiority, exploratory) | ___4___     |

**Methods: Participants, interventions, and outcomes**

|                      |     |                                                                                                                                                                                                                                                                                                                                                                                |             |
|----------------------|-----|--------------------------------------------------------------------------------------------------------------------------------------------------------------------------------------------------------------------------------------------------------------------------------------------------------------------------------------------------------------------------------|-------------|
| Study setting        | 9   | Description of study settings (eg, community clinic, academic hospital) and list of countries where data will be collected. Reference to where list of study sites can be obtained                                                                                                                                                                                             | ___18___    |
| Eligibility criteria | 10  | Inclusion and exclusion criteria for participants. If applicable, eligibility criteria for study centres and individuals who will perform the interventions (eg, surgeons, psychotherapists)                                                                                                                                                                                   | ___18___    |
| Interventions        | 11a | Interventions for each group with sufficient detail to allow replication, including how and when they will be administered                                                                                                                                                                                                                                                     | ___13___    |
|                      | 11b | Criteria for discontinuing or modifying allocated interventions for a given trial participant (eg, drug dose change in response to harms, participant request, or improving/worsening disease)                                                                                                                                                                                 | ___16,22___ |
|                      | 11c | Strategies to improve adherence to intervention protocols, and any procedures for monitoring adherence (eg, drug tablet return, laboratory tests)                                                                                                                                                                                                                              | ___n/a___   |
|                      | 11d | Relevant concomitant care and interventions that are permitted or prohibited during the trial                                                                                                                                                                                                                                                                                  | ___n/a___   |
| Outcomes             | 12  | Primary, secondary, and other outcomes, including the specific measurement variable (eg, systolic blood pressure), analysis metric (eg, change from baseline, final value, time to event), method of aggregation (eg, median, proportion), and time point for each outcome. Explanation of the clinical relevance of chosen efficacy and harm outcomes is strongly recommended | ___17-21___ |
| Participant timeline | 13  | Time schedule of enrolment, interventions (including any run-ins and washouts), assessments, and visits for participants. A schematic diagram is highly recommended (see Figure)                                                                                                                                                                                               | ___6___     |

1  
2  
3 Sample size 14 Estimated number of participants needed to achieve study objectives and how it was determined, including \_\_\_\_\_23\_\_\_\_\_  
4 clinical and statistical assumptions supporting any sample size calculations

5  
6 Recruitment 15 Strategies for achieving adequate participant enrolment to reach target sample size \_\_\_\_\_n/a\_\_\_\_\_  
7

8 **Methods: Assignment of interventions (for controlled trials)**  
9

10 Allocation:

11  
12 Sequence generation 16a Method of generating the allocation sequence (eg, computer-generated random numbers), and list of any \_\_\_\_\_12\_\_\_\_\_  
13 factors for stratification. To reduce predictability of a random sequence, details of any planned restriction  
14 (eg, blocking) should be provided in a separate document that is unavailable to those who enrol participants  
15 or assign interventions  
16

17 Allocation concealment mechanism 16b Mechanism of implementing the allocation sequence (eg, central telephone; sequentially numbered, \_\_\_\_\_19\_\_\_\_\_  
18 opaque, sealed envelopes), describing any steps to conceal the sequence until interventions are assigned  
19  
20

21 Implementation 16c Who will generate the allocation sequence, who will enrol participants, and who will assign participants to \_\_\_\_\_19\_\_\_\_\_  
22 interventions  
23

24 Blinding (masking) 17a Who will be blinded after assignment to interventions (eg, trial participants, care providers, outcome \_\_\_\_\_19\_\_\_\_\_  
25 assessors, data analysts), and how  
26

27 17b If blinded, circumstances under which unblinding is permissible, and procedure for revealing a participant's \_\_\_\_\_n/a\_\_\_\_\_  
28 allocated intervention during the trial  
29  
30

31 **Methods: Data collection, management, and analysis**  
32

33 Data collection methods 18a Plans for assessment and collection of outcome, baseline, and other trial data, including any related \_\_\_\_\_20\_\_\_\_\_  
34 processes to promote data quality (eg, duplicate measurements, training of assessors) and a description of  
35 study instruments (eg, questionnaires, laboratory tests) along with their reliability and validity, if known.  
36 Reference to where data collection forms can be found, if not in the protocol  
37

38 18b Plans to promote participant retention and complete follow-up, including list of any outcome data to be \_\_\_\_\_22\_\_\_\_\_  
39 collected for participants who discontinue or deviate from intervention protocols  
40  
41  
42  
43  
44

1  
2  
3  
4  
5  
6  
7  
8  
9  
10  
11  
12  
13  
14  
15  
16  
17  
18  
19  
20  
21  
22  
23  
24  
25  
26  
27  
28  
29  
30  
31  
32  
33  
34  
35  
36  
37  
38  
39  
40  
41  
42  
43  
44  
45  
46  
47

Data management 19 Plans for data entry, coding, security, and storage, including any related processes to promote data quality (eg, double data entry; range checks for data values). Reference to where details of data management procedures can be found, if not in the protocol 24

Statistical methods 20a Statistical methods for analysing primary and secondary outcomes. Reference to where other details of the statistical analysis plan can be found, if not in the protocol 22

20b Methods for any additional analyses (eg, subgroup and adjusted analyses) 22

20c Definition of analysis population relating to protocol non-adherence (eg, as randomised analysis), and any statistical methods to handle missing data (eg, multiple imputation) 22

**Methods: Monitoring**

Data monitoring 21a Composition of data monitoring committee (DMC); summary of its role and reporting structure; statement of whether it is independent from the sponsor and competing interests; and reference to where further details about its charter can be found, if not in the protocol. Alternatively, an explanation of why a DMC is not needed N/A

21b Description of any interim analyses and stopping guidelines, including who will have access to these interim results and make the final decision to terminate the trial N/A

Harms 22 Plans for collecting, assessing, reporting, and managing solicited and spontaneously reported adverse events and other unintended effects of trial interventions or trial conduct 26

Auditing 23 Frequency and procedures for auditing trial conduct, if any, and whether the process will be independent from investigators and the sponsor 24-25

**Ethics and dissemination**

Research ethics approval 24 Plans for seeking research ethics committee/institutional review board (REC/IRB) approval 1

Protocol amendments 25 Plans for communicating important protocol modifications (eg, changes to eligibility criteria, outcomes, analyses) to relevant parties (eg, investigators, REC/IRBs, trial participants, trial registries, journals, regulators) X

|    |                               |     |                                                                                                                                                                                                                                                                                     |                        |
|----|-------------------------------|-----|-------------------------------------------------------------------------------------------------------------------------------------------------------------------------------------------------------------------------------------------------------------------------------------|------------------------|
| 1  |                               |     |                                                                                                                                                                                                                                                                                     |                        |
| 2  |                               |     |                                                                                                                                                                                                                                                                                     |                        |
| 3  | Consent or assent             | 26a | Who will obtain informed consent or assent from potential trial participants or authorised surrogates, and how (see Item 32)                                                                                                                                                        | ___19___               |
| 4  |                               |     |                                                                                                                                                                                                                                                                                     |                        |
| 5  |                               |     |                                                                                                                                                                                                                                                                                     |                        |
| 6  |                               | 26b | Additional consent provisions for collection and use of participant data and biological specimens in ancillary studies, if applicable                                                                                                                                               | ___N/A___              |
| 7  |                               |     |                                                                                                                                                                                                                                                                                     |                        |
| 8  | Confidentiality               | 27  | How personal information about potential and enrolled participants will be collected, shared, and maintained in order to protect confidentiality before, during, and after the trial                                                                                                | ___24-26___            |
| 9  |                               |     |                                                                                                                                                                                                                                                                                     |                        |
| 10 |                               |     |                                                                                                                                                                                                                                                                                     |                        |
| 11 | Declaration of interests      | 28  | Financial and other competing interests for principal investigators for the overall trial and each study site                                                                                                                                                                       | ___2___                |
| 12 |                               |     |                                                                                                                                                                                                                                                                                     |                        |
| 13 |                               |     |                                                                                                                                                                                                                                                                                     |                        |
| 14 | Access to data                | 29  | Statement of who will have access to the final trial dataset, and disclosure of contractual agreements that limit such access for investigators                                                                                                                                     | ___26___               |
| 15 |                               |     |                                                                                                                                                                                                                                                                                     |                        |
| 16 |                               |     |                                                                                                                                                                                                                                                                                     |                        |
| 17 | Ancillary and post-trial care | 30  | Provisions, if any, for ancillary and post-trial care, and for compensation to those who suffer harm from trial participation                                                                                                                                                       | ___ethics___           |
| 18 |                               |     |                                                                                                                                                                                                                                                                                     |                        |
| 19 |                               |     |                                                                                                                                                                                                                                                                                     |                        |
| 20 | Dissemination policy          | 31a | Plans for investigators and sponsor to communicate trial results to participants, healthcare professionals, the public, and other relevant groups (eg, via publication, reporting in results databases, or other data sharing arrangements), including any publication restrictions | ___ethics___           |
| 21 |                               |     |                                                                                                                                                                                                                                                                                     |                        |
| 22 |                               |     |                                                                                                                                                                                                                                                                                     |                        |
| 23 |                               |     |                                                                                                                                                                                                                                                                                     |                        |
| 24 |                               |     |                                                                                                                                                                                                                                                                                     |                        |
| 25 |                               | 31b | Authorship eligibility guidelines and any intended use of professional writers                                                                                                                                                                                                      | ___N/A___              |
| 26 |                               |     |                                                                                                                                                                                                                                                                                     |                        |
| 27 |                               | 31c | Plans, if any, for granting public access to the full protocol, participant-level dataset, and statistical code                                                                                                                                                                     | ___N/A___              |
| 28 |                               |     |                                                                                                                                                                                                                                                                                     |                        |
| 29 | <b>Appendices</b>             |     |                                                                                                                                                                                                                                                                                     |                        |
| 30 |                               |     |                                                                                                                                                                                                                                                                                     |                        |
| 31 | Informed consent materials    | 32  | Model consent form and other related documentation given to participants and authorised surrogates                                                                                                                                                                                  | ___Site file/ethics___ |
| 32 |                               |     |                                                                                                                                                                                                                                                                                     |                        |
| 33 |                               |     |                                                                                                                                                                                                                                                                                     |                        |
| 34 | Biological specimens          | 33  | Plans for collection, laboratory evaluation, and storage of biological specimens for genetic or molecular analysis in the current trial and for future use in ancillary studies, if applicable                                                                                      | ___N/A___              |
| 35 |                               |     |                                                                                                                                                                                                                                                                                     |                        |
| 36 |                               |     |                                                                                                                                                                                                                                                                                     |                        |

\*It is strongly recommended that this checklist be read in conjunction with the SPIRIT 2013 Explanation & Elaboration for important clarification on the items. Amendments to the protocol should be tracked and dated. The SPIRIT checklist is copyrighted by the SPIRIT Group under the Creative Commons "[Attribution-NonCommercial-NoDerivs 3.0 Unported](https://creativecommons.org/licenses/by-nc-nd/3.0/)" license.

# BMJ Open

## Early initiation of post-sternotomy cardiac rehabilitation exercise training (SCAR): study protocol for a randomised controlled trial and economic evaluation.

|                                 |                                                                                                                                                                                                                                                                                                                                                                                                                                                                                                                                                                                                                                                                                                                                                                                                                                                                                                                                                                                                          |
|---------------------------------|----------------------------------------------------------------------------------------------------------------------------------------------------------------------------------------------------------------------------------------------------------------------------------------------------------------------------------------------------------------------------------------------------------------------------------------------------------------------------------------------------------------------------------------------------------------------------------------------------------------------------------------------------------------------------------------------------------------------------------------------------------------------------------------------------------------------------------------------------------------------------------------------------------------------------------------------------------------------------------------------------------|
| Journal:                        | <i>BMJ Open</i>                                                                                                                                                                                                                                                                                                                                                                                                                                                                                                                                                                                                                                                                                                                                                                                                                                                                                                                                                                                          |
| Manuscript ID                   | bmjopen-2017-019748.R2                                                                                                                                                                                                                                                                                                                                                                                                                                                                                                                                                                                                                                                                                                                                                                                                                                                                                                                                                                                   |
| Article Type:                   | Protocol                                                                                                                                                                                                                                                                                                                                                                                                                                                                                                                                                                                                                                                                                                                                                                                                                                                                                                                                                                                                 |
| Date Submitted by the Author:   | 13-Feb-2018                                                                                                                                                                                                                                                                                                                                                                                                                                                                                                                                                                                                                                                                                                                                                                                                                                                                                                                                                                                              |
| Complete List of Authors:       | Ennis, Stuart; University Hospitals Coventry and Warwickshire NHS Trust, Cardiac Rehabilitation; Cardiff Metropolitan University, Cardiff Centre for Exercise & Health<br>Lobley, Grace; University Hospitals Coventry and Warwickshire NHS Trust, Cardiac Rehabilitation<br>Worrall, Sandra; University Hospitals Coventry and Warwickshire NHS Trust, Cardiac Rehabilitation<br>Powell, Richard; University Hospitals Coventry and Warwickshire NHS Trust, Cardiac Rehabilitation<br>Kimani, Peter; University of Warwick, Warwick Medical School<br>Khan, Amir; Coventry University, Faculty of Health and Life Sciences<br>Banerjee, Prithwish; University Hospitals Coventry and Warwickshire NHS Trust, Department of Cardiology<br>Barker, Thomas; University Hospitals Coventry and Warwickshire NHS Trust, Cardiothoracic Surgery<br>McGregor, Gordon; University Hospitals Coventry and Warwickshire NHS Trust, Cardiac Rehabilitation; Coventry University, Faculty of Health & Life Sciences |
| <b>Primary Subject Heading</b>: | Cardiovascular medicine                                                                                                                                                                                                                                                                                                                                                                                                                                                                                                                                                                                                                                                                                                                                                                                                                                                                                                                                                                                  |
| Secondary Subject Heading:      | Health economics, Sports and exercise medicine, Surgery, Cardiovascular medicine                                                                                                                                                                                                                                                                                                                                                                                                                                                                                                                                                                                                                                                                                                                                                                                                                                                                                                                         |
| Keywords:                       | Coronary heart disease < CARDIOLOGY, HEALTH ECONOMICS, SPORTS MEDICINE, Cardiac surgery < SURGERY                                                                                                                                                                                                                                                                                                                                                                                                                                                                                                                                                                                                                                                                                                                                                                                                                                                                                                        |
|                                 |                                                                                                                                                                                                                                                                                                                                                                                                                                                                                                                                                                                                                                                                                                                                                                                                                                                                                                                                                                                                          |

SCHOLARONE™  
Manuscripts



1  
2  
3 **Early initiation of post-sternotomy cardiac rehabilitation exercise training (SCAR):**  
4 **study protocol for a randomised controlled trial and economic evaluation.**  
5  
6  
7

8  
9 Stuart Ennis<sup>1,2</sup> Grace Lobley<sup>1</sup>, Sandra Worrall<sup>1</sup>, Richard Powell<sup>1</sup>, Peter K Kimani<sup>3</sup>,  
10 Amir Khan<sup>6</sup>, Prithwish Banerjee<sup>5,6</sup>, Tom Barker<sup>7</sup>, Gordon McGregor<sup>1,6\*</sup>  
11  
12  
13

14  
15 \*Corresponding Author: Department of Cardiac Rehabilitation  
16 Centre for Exercise & Health, Watch Close, Coventry CV1 3LN  
17 **Email:** gordon.mcgregor@uhcw.nhs.uk  
18 **Tel:** 02476 234 570  
19  
20  
21  
22

23 <sup>1</sup> Department of Cardiac Rehabilitation, Centre for Exercise & Health, University Hospital,  
24 Coventry, UK

25 <sup>2</sup> Cardiff Centre for Exercise & Health, Cardiff Metropolitan University, Cardiff, UK

26 <sup>3</sup> Statistics and Epidemiology, Division of Health Sciences, Warwick Medical School,  
27 University of Warwick, Warwick, UK

28 <sup>4</sup> Centre for Health Economics and Medicines Evaluation, Bangor University, Bangor, UK

29 <sup>5</sup> Department of Cardiology, University Hospital, Coventry, UK

30 <sup>6</sup> Health & Life Sciences Research Centre, Coventry University, Coventry, UK

31 <sup>7</sup> Department of Cardiothoracic Surgery, University Hospital, Coventry, UK  
32  
33  
34  
35  
36  
37  
38  
39

40 Key words: Coronary heart disease, coronary artery bypass graft, valve replacement, muscle  
41 atrophy, cardiovascular fitness  
42  
43  
44  
45

46 Word count: 3684  
47  
48  
49  
50  
51  
52  
53  
54  
55

## Abstract

**Introduction:** Current guidelines recommend abstinence from supervised cardiac rehabilitation (CR) exercise training for six weeks post-sternotomy. This practice is not based on empirical evidence, thus imposing potentially unnecessary activity restrictions. Delayed participation in CR exercise training promotes muscle atrophy, reduces cardiovascular fitness, and prolongs recovery. Limited data suggest no detrimental effect of beginning CR exercise training as early as two weeks post-surgery, but randomised controlled trials are yet to confirm this. The purpose of this trial is to compare CR exercise training commenced early (2 weeks post-surgery) with current usual care (6 weeks post-surgery) with a view to informing future CR guidelines for patients recovering from sternotomy.

**Methods and analysis:** In this assessor-blind randomised controlled trial, 140 cardiac surgery patients, recovering from sternotomy, will be assigned to eight weeks of twice weekly supervised CR exercise training commencing at either two weeks (early CR) or 6 weeks (usual care CR) post-surgery. Usual care exercise training will adhere to current UK recommendations. Participants in the early CR group will undertake a highly individualised 2-3 week programme of functional mobility, strength and cardiovascular exercise before progressing to a usual care CR programme. Outcomes will be assessed at baseline (in-patient), pre-CR (2 or 6 weeks post-surgery), post CR (10 or 14 weeks post-surgery) and 12 months. The primary outcome will be change in six-minute walk distance. Secondary outcomes will include measures of functional fitness, quality of life and cost effectiveness.

**Ethics and dissemination:** The study protocol v.1.0, dated 25<sup>th</sup> January 2017 was approved by the NHS Health Research Authority, West Midlands - Edgbaston Research Ethics Committee (17/WM/0057). Recruitment commenced July 2017 and will complete by December 2019. Results will be disseminated via national governing bodies, scientific meetings and peer-reviewed journals.

**Trial registration number:** This study is registered with ClinicalTrials.gov: NCT03223558

**Strengths and limitations of this study:**

- This trial will be conducted in a 'real world' community cardiac rehabilitation environment, ensuring a high degree of ecological validity.
- Randomisation and blinding will minimise any potential bias.
- As a limitation, this trial will only be performed in a single centre, thus potentially reducing external validity. Future trials should consider a multi-centre design.

For peer review only

## Introduction

Every year approximately 35,000 patients undergo coronary artery bypass graft (CABG) or aortic/mitral valve replacement surgery in the UK (1). Functional limitation is common and persistent after surgery, mediated by chest wall pain, respiratory complications, fatigue, and anxiety concerning the resumption of daily activities (2-4). At 12 months, previous studies have reported sternal wound pain in nearly 50% of patients (2), and 'unsatisfactory' functional status and quality of life in a third of patients (5). These issues can delay return to work, particularly for those with physically demanding jobs, and the financial consequences can be significant (6, 7).

The benefits of cardiac rehabilitation (CR) exercise training after sternotomy are well documented. A recent Cochrane review reported reduced cardiovascular mortality and hospital readmissions, in addition to improved quality of life (8). Higher fitness levels following CR exercise training also predict better outcomes and lower mortality rates (9). Historically, supervised CR exercise training does not commence until 42 days (6 weeks) after surgery, during which time functional capacity can deteriorate rapidly (8). This guideline emanates from concerns that exercise may slow healing or increase the likelihood of sternal instability and infection (6). These concerns may be justified given that serious complications, such as mediastinitis, are associated with significant mortality (10, 11). To date, however, there is no evidence directly linking early post-operative physical activity to an increased risk of sternal complications (6).

Existing sternal precautions are likely the product of expert opinion and anecdotal evidence. Consequently, practice varies considerably in hospitals and CR centres around the world (7). Sternal precautions, which often lack individualisation, may be overly

1  
2  
3 restrictive, reinforcing fear of activity, and delaying recovery (12, 13). Indeed, long periods  
4 of inactivity, particularly in the elderly, can slow healing and promote muscle atrophy. The  
5 Dallas bed rest studies demonstrated that three weeks of total inactivity had a more  
6 profound impact on exercise capacity than 30 years of aging (14, 15). Cardiac muscle mass  
7 has also been shown to decrease by 8% after six weeks of bed rest (15). Additionally,  
8 inactivity of 10-12 days is sufficient to lead to a loss of skeletal muscle mass of 0.5-0.6%  
9 per day (16). This avoidable muscle wasting is likely to be accelerated in elderly patients,  
10 with potentially significant consequences. The increased risk of falls associated with  
11 muscle atrophy can lead to hip or pelvic fractures, for which the one year mortality rate can  
12 be as high as 40% (17).  
13  
14  
15  
16  
17  
18  
19  
20  
21  
22  
23  
24  
25

26 Evidence for the safety of earlier CR (<6 weeks post-surgery) exercise training in  
27 sternotomy patients is accumulating (18). Studies have shown that in-patient walking and  
28 cycling, 1-7 days post-surgery, is safe and effective (19, 20). Further, no difference was  
29 found in hospital readmissions, infection rates or sternal instability between patients who  
30 started CR exercise training 10 days or 4-7 weeks post-discharge (21). Consequently,  
31 current post-sternotomy activity restrictions may be overly cautious. On the grounds of  
32 safety, surgical patients are commonly advised to avoid lifting more than 5 lbs for 12  
33 weeks after surgery. Adams and colleagues, however, reported that the forces generated by  
34 sneezing and coughing (commonly endured without incident) far exceed that of upper-  
35 body dumbbell exercise and other restricted daily activities such as lifting a coffee pot and  
36 pushing a lawn mower (7, 12). There is little empirical evidence to support universal  
37 restriction of such activities for 12 weeks post sternotomy.  
38  
39  
40  
41  
42  
43  
44  
45  
46  
47  
48  
49  
50  
51  
52  
53  
54  
55  
56  
57  
58  
59  
60

1  
2  
3 A number of studies have highlighted the detrimental effects of delayed enrolment on CR  
4 programmes following cardiac surgery. In the UK, the National Audit for Cardiac  
5 Rehabilitation (NACR), recently reported that, for every 1-day increase in CR wait time,  
6  
7 patients were 1% less likely to improve across all fitness-related measures (22). This finding  
8  
9 is supported by Canadian data which, in an analysis of 6497 CABG patients, found that  
10  
11 longer wait times before CR initiation were associated with lesser improvement in  
12  
13 cardiovascular fitness (23). Attendance on CR programmes is also negatively impacted by  
14  
15 extended waits. Studies have consistently determined that patients are less likely to attend and  
16  
17 adhere to CR, the longer they are required to wait post-cardiac event (24, 25)  
18  
19  
20  
21  
22  
23

24 Evidence to support the earlier initiation of post-sternotomy CR exercise training is,  
25  
26 therefore, apparent in a number of areas. Muscle mass and cardiovascular fitness decline  
27  
28 rapidly with post-surgical inactivity, and when CR programme initiation is delayed,  
29  
30 attendance is lower, and the benefits of exercise training are reduced. Moreover, there is  
31  
32 insufficient evidence to support the current guideline of a six week wait post-surgery, and  
33  
34 safety does not appear to be compromised by earlier CR. Whilst the growing evidence base  
35  
36 for earlier post-sternotomy CR exercise training is relatively compelling, good quality  
37  
38 prospective trials have not been performed. As such, randomised controlled trials are required  
39  
40 to confirm benefit, safety and cost effectiveness. Results of such studies are essential before  
41  
42 national guidelines can be established, allowing policymakers and clinicians to be confident  
43  
44 in altering practice.  
45  
46  
47  
48  
49

50 The early initiation of post-sternotomy cardiac rehabilitation exercise training (SCAR) trial is  
51  
52 a single-centre randomised controlled trial, and economic evaluation, comparing supervised  
53  
54  
55

1  
2  
3 exercise training commenced at two weeks (early CR) with exercise training commenced at  
4  
5 six weeks (usual care CR) post-sternotomy. The main objectives of the trial are:  
6  
7

- 8  
9 1. To assess the effect of early CR on functional fitness.
- 10  
11 2. To assess the effect of early CR on anxiety, depression and health related quality of  
12  
13 life (HR-QoL).
- 14  
15 3. To assess compliance and adherence to early CR.
- 16  
17 4. To conduct a cost-effectiveness analysis of early CR compared to usual care CR.
- 18  
19 5. To assess the safety of early CR  
20  
21  
22  
23

24 In cardiac surgery patients recovering from sternotomy, our primary hypothesis is that early CR  
25  
26 will improve walking distance to the same extent as usual care CR. With limited data on early  
27  
28 CR in this population, particularly in the UK, we propose a holistic investigation including  
29  
30 the following secondary hypotheses: early CR will 1) be as effective as usual care CR in  
31  
32 improving functional fitness; 2) be as effective as usual care CR in improving anxiety and  
33  
34 depression; 3) be as effective as usual care CR in improving HR-QoL; 4) demonstrate  
35  
36 equivalent adherence and compliance to usual care CR; 5) be as cost effective as usual care  
37  
38 CR; 6) be as safe as usual care CR.  
39  
40  
41  
42  
43

#### 44 **Methods and analysis**

45  
46 The SCAR study is an assessor-blind parallel group, randomised controlled trial and  
47  
48 economic evaluation. Participants will be randomly allocated to eight weeks of CR exercise  
49  
50 training commencing at either two weeks (early CR) or six weeks (usual care CR) post-  
51  
52 surgery. Outcomes will be measured at baseline (within 7 days of surgery), start of CR (2 or 6  
53  
54  
55

1  
2  
3 weeks), end of CR (10 or 14 weeks), and at 12 months. Assessors will be blinded to group  
4  
5 allocation. The trial protocol adheres to the Standard Protocol Items: Recommendations for  
6  
7 Clinical Trials (SPIRIT) guidelines (26).  
8  
9

## 10 11 **Setting**

12  
13 The SCAR trial will be conducted at two cardiac rehabilitation venues provided by  
14  
15 University Hospitals Coventry & Warwickshire (UHCW) NHS Trust, 1) Atrium Health,  
16  
17 Centre for Exercise & Health, Coventry, and 2) Hospital of St. Cross, Rugby. Both CR  
18  
19 programmes are certified by the British Association of Cardiovascular Prevention and  
20  
21 Rehabilitation (BACPR), thus, providing the necessary infrastructure and expertise for the  
22  
23 delivery of the SCAR intervention. All cardiac surgery will be performed at University  
24  
25 Hospital, Coventry, a national specialist tertiary cardiac centre. One hundred and seventy  
26  
27 patients will be recruited over a two-year period, commencing 15<sup>th</sup> July 2017.  
28  
29  
30

## 31 32 **Participants**

33  
34 All patients who are to undergo elective or emergency sternotomy for coronary artery  
35  
36 bypass graft surgery or mitral/aortic valve replacement will be screened for eligibility.  
37  
38  
39 Inclusion and exclusion criteria are summarised in table 1.  
40  
41  
42  
43  
44  
45  
46  
47  
48  
49  
50  
51  
52  
53  
54  
55  
56  
57  
58  
59  
60



**Table 1.** Inclusion and exclusion criteria

| Inclusion criteria                                                                                                                                                                                                                                                                                                                                                   | Exclusion Criteria                                                                                                                                                                                                                                                                                                                                                                                                                                                                 |
|----------------------------------------------------------------------------------------------------------------------------------------------------------------------------------------------------------------------------------------------------------------------------------------------------------------------------------------------------------------------|------------------------------------------------------------------------------------------------------------------------------------------------------------------------------------------------------------------------------------------------------------------------------------------------------------------------------------------------------------------------------------------------------------------------------------------------------------------------------------|
| <ul style="list-style-type: none"> <li>▪ Coronary artery bypass graft and mitral/aortic valve replacement patients recovering from sternotomy, and eligible for cardiac rehabilitation exercise training in accordance with UK standards (27)</li> <li>▪ Able to provide written informed consent</li> <li>▪ Male or female</li> <li>▪ 18-90 years of age</li> </ul> | <ul style="list-style-type: none"> <li>▪ Serious cardiac arrhythmias</li> <li>▪ Current neurological disorders or previous cerebral vascular accident with residual neurological deficit significant enough to limit exercise</li> <li>▪ Unable to enrol for the full study duration</li> <li>▪ Inability to comply with guidelines for participation in exercise training (28, 29)</li> <li>▪ Significant limiting comorbidities that would prevent full participation</li> </ul> |

### Study Procedures

The participant study pathway is illustrated in figure 1. All cardiac surgery patients will be screened and assessed for eligibility by the research team in consultation with the trial clinical lead. Patients meeting the inclusion criteria will be informed of the study at the first available opportunity. For elective patients, this will take place at either the pre-operative assessment clinic appointment (approximately two weeks prior to surgery), or on admission for surgery. For emergency admissions, patients will be informed of the study early in the post-operative period if it is inappropriate for the study to be discussed pre-surgery. Those who may be interested in participating will be given the patient information leaflet and permitted a minimum of 24 hours to consider their involvement prior to a follow-up phone call or in-patient visit from the research team. Non-English speaking patients will have access to translation services. Informed consent will be obtained on admission for surgery or early in the post-operative period. Baseline data collection will include clinical examination, 6-minute walk test (6-MWT), five times sit-to-stand test (FTSTS), hand grip strength, and isometric leg muscle strength. Instruments to assess anxiety and depression, HR-QoL, and health and

1  
2  
3 social care use, will also be administered. Subsequently, participants will be randomised to  
4 twice weekly CR exercise training, commencing at either two weeks post-surgery (early CR)  
5 or six weeks post-surgery (usual care CR). All measures will be repeated immediately prior  
6 to starting CR (2 or 6 weeks post-surgery), on completion of 8 weeks of CR exercise training  
7 (10 or 14 weeks post-surgery), and at 12 months follow-up. Transport to and from the CR  
8 venues will be offered to patients who are not permitted to drive due to post-surgical Driving  
9 and Vehicle Licencing Agency (DVLA) restrictions.  
10  
11  
12  
13  
14  
15  
16  
17  
18  
19

## 20 **Interventions**

21 Participants in both groups will attend eight weeks of twice-weekly supervised CR exercise  
22 training. Both groups will exercise at the same time, in the same facility, with equal levels of  
23 supervision, and each session will last approximately one hour. The usual care CR group will  
24 adhere to current UK standards (BACPR/ACPICR) (27), commencing exercise training at six  
25 weeks post-surgery. In brief, a 15-minute warm-up will incorporate light cardiovascular and  
26 mobility exercises (<40% heart rate reserve, HRR). The subsequent cardiovascular exercise  
27 component (cycle ergometer, rowing ergometer, treadmill, arm ergometer, cross trainer) will  
28 involve 20 minutes of moderate intensity interval training (1-2 minute intervals), progressing  
29 to 20-40 minutes of continuous cardiovascular exercise at 40-70% HRR. After a 10-minute  
30 cool-down, a full programme of functional muscular strength, flexibility and proprioception  
31 exercises will be undertaken (e.g. resistance machines, free weights, multi-plane functional  
32 daily living exercise). Care will be taken to ensure upper body exercises are performed in  
33 such a way to avoid sternal and leg wound pain/complications. Exercise intensity will be  
34 prescribed using estimated metabolic equivalents (METs) from the six-minute walk test (6-  
35 MWT). Duration and workload will be increased, as tolerated, based on heart rate and patient  
36 reported rating of perceived exertion (RPE). Written home exercise guidance will be  
37  
38  
39  
40  
41  
42  
43  
44  
45  
46  
47  
48  
49  
50  
51  
52  
53  
54  
55

provided for the six weeks preceding CR enrolment. This guidance has been produced locally and recommends short bouts (5 minutes) of light-moderate intensity walking, progressing in duration each week after surgery. In addition, a series of shoulder mobility exercises will be completed, with the advice to avoid pain and/or undue post-exercise fatigue.

Currently there are no specific exercise prescription guidelines for outpatient CR in patients who have undergone recent sternotomy (<6 weeks). In the first 2-3 weeks of early CR, participants will follow a highly individualised exercise programme dictated by their current level of fitness and post-surgery symptoms/limitations. General guidance will be taken from previous exploratory work (7) aimed at maintaining and increasing mobility and functional strength. Shoulder and chest mobility/strength exercises will be performed when they can be completed with minimal discomfort, and moderate intensity cardiovascular interval training will be gradually introduced. By weeks 2-3 of early CR, participants will progress towards achieving current UK standards as above (BACPR/ACPICR) (27). Initially, warm-up and cool-down will be specifically tailored to the planned exercises, without adhering to current guidelines. Table 2 provides an overview of the early CR exercise intervention.

**Table 2.** General principles of exercise training for early CR (first 2-3 weeks of CR)

- 
- Highly individualised programme based on current limitations, mobility, fitness and symptoms
  - Shortened warm-up and cool down where required, appropriate to the main exercise component
  - Focus on improvement of posture, mobility, proprioception and functional strength
  - Range of movement dictated by sternal and leg wound pain – pain free exercise advised
  - Low-moderate intensity CV exercise (excluding rowing machine and arm ergometer for 2 weeks) i.e treadmill, cycle ergometer, step-ups
  - Seated exercise where necessary
- 

Extension of the CR programme beyond 8 weeks will be permitted in both groups

1  
2  
3 where two or more consecutive exercise sessions are missed. This is in keeping with  
4 standard practice in UK cardiac rehabilitation programmes, and the pragmatic nature  
5 of the trial. Sufficient adherence to the study protocol will be determined by the  
6 following criteria:  
7  
8  
9

- 10 • A minimum of 66% of sessions completed (12 of 18).
- 11 • 20 minutes continuous cardiovascular exercise achieved by week four of the CR  
12 programme.

### 13 14 15 16 17 18 19 20 21 22 23 **Randomisation and blinding:**

24 Trial participants will be allocated to early CR or usual care CR, on a 1:1 basis, via block  
25 randomisation. The random allocation sequence will be generated by the trial statistician,  
26 implemented by an independent CR team member, and compliance will be ensured by  
27 UHCW NHS Trust R&D department. Randomisation requests will only be submitted further  
28 to completion of all baseline assessments, thus ensuring allocation concealment. At all time  
29 points, outcome assessors will be blinded to group allocation, as will the cardiac surgeons.  
30  
31 Due to the nature of the trial, it will not be possible to blind the CR staff involved in the  
32 delivery of the exercise training interventions. Likewise, participants cannot be blinded.  
33  
34  
35  
36  
37  
38  
39  
40  
41  
42  
43  
44

### 45 **Study outcome measures:**

46 The primary outcome measure is the change in six-minute walk distance at the end of the CR  
47 exercise training programme. Secondary outcomes will include measures of 1) functional  
48 fitness; 2) anxiety and depression; 3) HR-QoL; 4) compliance and adherence; 5) cost  
49 effectiveness, and 6) safety. Table 3 outlines the full schedule of outcome assessments.  
50  
51  
52  
53  
54  
55

**Table 3.** Outcome measures and schedule of assessments

| Measure                   | Instrument                          | Assessment time point                 |
|---------------------------|-------------------------------------|---------------------------------------|
| <b>Primary outcome</b>    |                                     |                                       |
| Walking distance          | Six-minute walk test                | Baseline, start CR, end CR, 12 months |
| <b>Secondary outcomes</b> |                                     |                                       |
| Functional fitness        | Five times sit-to-stand             | Baseline, start CR, end CR, 12 months |
|                           | Handgrip strength                   | Baseline, start CR, end CR, 12 months |
|                           | Isometric leg strength              | Baseline, start CR, end CR, 12 months |
| Anxiety and depression    | GAD-7                               | Baseline, start CR, end CR, 12 months |
|                           | PHQ-9                               | Baseline, start CR, end CR, 12 months |
| HR-QOL                    | SF-12                               | Baseline, start CR, end CR, 12 months |
| Compliance, adherence     | Compliance/adherence/drop-out rates | Continuous                            |
| Cost effectiveness        | EQ-5D                               | Baseline, start CR, end CR, 12 months |
|                           | CSRI                                | Start CR, end CR, 12 months           |
| Safety                    | Adverse event monitoring            | Continuous                            |

CR, cardiac rehabilitation; GAD-7, Generalised Anxiety Disorder assessment; PHQ-9, Patient Health Questionnaire; HR-QoL, health related quality of life; SF-12; 12-Item Short Form Survey; EQ-5D, 5-Item EuroQol; CSRI, client service receipt inventory.

### Primary outcome

The six-minute walk test (6-MWT) is a general measure of functional capacity, and an important prognostic indicator in cardiac surgery populations (30-32). Tests will be conducted in accordance with American Thoracic Society (ATS) guidelines (33). Participants will be instructed to walk as far as possible along a 30m, flat, obstacle free corridor, turning 180 degrees every 30m, in the allotted time of six minutes.

### Functional fitness

The five times sit-to-stand test is often used in clinical and research settings (34) for the measurement of functional lower-extremity muscular strength and power. To complete the FTSTS, the participant will be instructed to stand up and sit down five times as quickly as

1  
2  
3 possible without using their arms for assistance. To ensure good test-retest reliability (35),  
4  
5 standardised foot placement and chair height will be required for each participant. A Jamar  
6  
7 hand dynamometer (Sammons Preston Inc; Bollingbrook, Illinois) will be used to evaluate  
8  
9 hand grip strength in the dominant hand. The position of the participant's arm will adhere to  
10  
11 American Society of Hand Therapists recommendations (36) and participants will be  
12  
13 instructed to maintain maximal grip contraction for 2-5 seconds. Isometric quadriceps  
14  
15 strength will be assessed using a hand held dynamometer (MicroFET2 Torque/Force  
16  
17 indicator, Hoggan Health Industries, Utah, US) (37). Whilst sitting in an elevated chair, with  
18  
19 hips and knees aligned at 90 degrees and the lower leg vertical, participants will exert  
20  
21 maximal force against equal and opposite resistance provided by the assessor.  
22  
23  
24  
25

### 26 **Anxiety, depression and HR-QoL**

27  
28 The seven item Generalised Anxiety Disorder assessment (GAD-7) and nine-item Patient  
29  
30 Health Questionnaire (PHQ-9) are well validated for the assessment of anxiety and  
31  
32 depression (38, 39). Both are widely used as brief diagnostic tools, and measures of severity.  
33  
34 Furthermore, they are routinely recorded in the CR population as part of standard clinical  
35  
36 practice with the results reported in the National Audit of Cardiac Rehabilitation (NACR)  
37  
38 (40). The 12-Item Short Form Survey (SF-12) will be used to evaluate HR-QoL (41). The 12  
39  
40 items of the questionnaire are summarised in two weighted summary scales; mental health  
41  
42 score (MCS) and physical health score (PCS), where lower scores indicate more severe  
43  
44 disability.  
45  
46  
47  
48  
49

### 50 **Compliance and adherence**

51  
52 Compliance and adherence is an important outcome in patients commencing CR exercise  
53  
54 training early post-surgery. Attendance at CR exercise sessions will be closely monitored  
55

1  
2  
3 along with compliance to the prescribed exercise regimen. The number of sessions attended  
4  
5 will be documented, as will the number of sessions successfully completed. Detailed reasons  
6  
7 for incomplete sessions, and drop out, will be recorded where the participant is happy to  
8  
9 provide this information.  
10

### 11 12 13 **Economic evaluation**

14  
15 The EQ-5D questionnaire is a commonly used generic measure of health status. A key feature  
16  
17 is the availability of 'value sets' to weight the EQ-5D health states reported by participants  
18  
19 and populations. The UK value set reported by Dolan (1997) (42) is recommended by NICE  
20  
21 for use in its health technology appraisal process (43). An adapted client service receipt  
22  
23 inventory (CSRI), based on examples in the DIRUM database (44) will be administered at  
24  
25 each time point to capture participant health and social care service use since the last time  
26  
27 point. The cost of delivering early CR and usual care CR (i.e. staff, equipment, facility) will  
28  
29 be recorded throughout the CR programme.  
30  
31  
32  
33  
34

### 35 **Safety**

36  
37 To verify the safety of early CR exercise training, all adverse and serious adverse events  
38  
39 will be carefully monitored, recorded and reported. In line with the principles of Good  
40  
41 Clinical Practice (GCP), the nature and severity of the event, in addition to its potential  
42  
43 association with study participation, will be recorded (45). As with current usual care, the  
44  
45 local CR team, in conjunction with the trial clinician, will decide if participants with  
46  
47 sternal instability or wound infection should be delayed or withdrawn.  
48  
49  
50  
51  
52  
53  
54  
55

### **Sample size**

The sample size calculation is based on the primary analysis of change in 6-MWT distance post-CR from baseline. Based on a recent systematic review and meta-analysis of CR patients (46), we assume a standard deviation of 65m. Assuming that mean changes in 6-MWT distances at the end of CR sessions for both early CR and usual care CR are equal, 60 patients are required in each group (120 in total) to conclude non-inferiority (non-inferiority margin of 35) with 90% power. To allow for approximate dropout rate of 15%, 70 patients will need to be randomised to each group (140 in total).

### **Data collection and management**

Data will be collected by research staff on case report forms at four time points; baseline, pre-CR, post-CR and 12 months follow up. Local policy and national data protection guidance will be followed with study data anonymously recorded on a bespoke trial database using unique study identification numbers.

### **Statistical analysis**

The primary analysis will test non-inferiority of the early CR group compared to usual care CR based on changes in 6-MWT distances. The non-inferiority margin has been set at 35m based on the previously reported minimally important clinical differences (47-49). Early CR will be concluded non-inferior to usual care CR if the lower bound of the 95% confidence interval for the mean difference of changes at the end of CR is less than 35m. If the lower bound of the 95% confidence interval for the mean difference in changes at the end of CR is above 0, early CR will be concluded superior to usual care CR. The 95% confidence interval will be based on the t-distribution for the mean difference in changes between early and usual care CR.



1  
2  
3 In secondary analysis, a linear mixed model will include all 6-MWT distances taken from  
4 each patient at different time points, from baseline (at randomisation) to 14 weeks. Fourteen  
5 weeks is the time point at which CR exercise training will be complete in the usual care CR  
6 group. The model will include terms for group (early or usual care CR), and time (baseline,  
7 pre-CR, post-CR, 12 months). To assess if the trends for early CR and usual care CR are  
8 different, an interaction term for group and time will be included in the linear mixed models.  
9  
10 All data will be summarised and reported in accordance with the Consolidated Standards of  
11 Reporting Trials (CONSORT) guideline (50).  
12  
13  
14  
15  
16  
17  
18  
19  
20  
21

### 22 **Economic evaluation**

23  
24 Economic evaluation will complement the trial's clinical effectiveness results and inform  
25 decision-making on the commissioning of early CR. We will conduct a cost-effectiveness  
26 analysis to estimate cost per unit of health gains due to early CR compared to usual CR (e.g.  
27 cost per additional distance covered in the 6-MWT). The costs and effects for participants in  
28 each group will be compared for the economic evaluation of the intervention. Given that the  
29 primary outcome is measured in natural units, and that the trial lasts 12 months, a cost-  
30 effectiveness (CE) approach is preferred for the economic evaluation (51). A service provider  
31 perspective will be adopted: a client service receipt inventory (CSRI), administered pre-CR,  
32 post CR and at 12 months, will collect data for participants' health and social care resource  
33 use (direct medical and non-medical resources) since the last data collection point. Health  
34 outcome measures for effectiveness, reported in table 3, and economic resource use, listed in  
35 table 4, will be measured as per the recommendations of the Expert Delphi Consensus Survey  
36 (52). The collected resource use and effects data will be handled with Stata software for  
37 statistical analysis of economic evaluation (53). The missing values will be analysed through  
38 multiple imputation. The incremental cost and effectiveness ratios will be estimated for early  
39  
40  
41  
42  
43  
44  
45  
46  
47  
48  
49  
50  
51  
52  
53  
54  
55

CR and obtained by dividing the incremental cost by the incremental gain in meters from the 6-MWT. Incremental cost and effectiveness ratios and Cost-Effectiveness Acceptability Curves will be used to evaluate if the health benefit generated by early CR is worth any additional cost associated with the intervention. A non-parametric bootstrap technique will be employed to report uncertainty around CE measures. The CE analysis will adhere to the Consolidated Health Economic Evaluation Reporting Standards (CHEERS) statement for the reporting of published economic evaluations (54).

**Table 4.** Resource use and intervention cost measures

| Measure                                                      | Instrument | Assessment time point       |
|--------------------------------------------------------------|------------|-----------------------------|
| <b>Secondary care</b>                                        |            |                             |
| Number and length of admissions (inpatient stay or day case) | CSRI       | Start CR, end CR, 12 months |
| Number of outpatient appointments                            |            |                             |
| <b>Emergency care</b>                                        |            |                             |
| Number of visits to A&E                                      | CSRI       | Start CR, end CR, 12 months |
| Number of admissions to hospital, after A&E                  |            |                             |
| <b>Primary care</b>                                          |            |                             |
| Type of professional seen                                    | CSRI       | Start CR, end CR, 12 months |
| Number and length of visits                                  |            |                             |
| <b>Health care at home</b>                                   |            |                             |
| Type of professional seen                                    | CSRI       | Start CR, end CR, 12 months |
| Number and length of visits                                  |            |                             |
| <b>Medication</b>                                            |            |                             |
| Name/class/dose                                              | CSRI       | Start CR, end CR, 12 months |
| <b>Cost of intervention</b>                                  |            |                             |
| Staff, equipment, facility                                   | Cost diary | Every participant contact   |

CSRI, client service receipt inventory; CR, cardiac rehabilitation; A&E, accident and emergency

### Patient and public involvement

Patient and public involvement (PPI) has shaped the study design. Our patient forum endorsed the acceptability of early CR exercise training after surgery, and stressed the importance of returning to work/activities of daily living as soon as possible. Our PPI co-

1  
2  
3 investigator, with lived experience of cardiac surgery, met with several surgical patients, each  
4 of whom was sent an overview of the early research protocol. The feedback helped  
5  
6 researchers select outcome measures that were relevant to patients' daily experiences and,  
7  
8 that crucially, would not unduly inconvenience participants. Multiple, time consuming,  
9  
10 invasive outcome measures were considered unethical so early after major surgery.  
11  
12  
13  
14  
15

### 16 **Ethics**

17  
18 The study protocol v1.0, dated 25<sup>th</sup> January 2017, was approved by the NHS Health Research  
19  
20 Authority, West Midlands - Edgbaston Research Ethics Committee on 24<sup>th</sup> February 2017  
21  
22 (17/WM/0057).  
23  
24  
25

### 26 **Dissemination and impact**

27  
28 Research findings will be presented at scientific meetings and published in peer-reviewed  
29  
30 journals. All authors will approve the prepared manuscripts and authorship will be agreed  
31  
32 based on international recommendations (ICMJE). The trial is anticipated to influence the  
33  
34 direction of future research into CR in sternotomy patients. It is also expected that results  
35  
36 from this trial will influence national CR guidelines. As such, findings, relating to both  
37  
38 scientific outcomes and CR service provision will be disseminated amongst national  
39  
40 governing bodies, and associated organisations, via newsletters and conferences.  
41  
42  
43  
44  
45  
46  
47  
48  
49  
50  
51  
52  
53  
54  
55

1  
2  
3 **Figure 1. Trial flow chart**

4 UHCW, University Hospitals Coventry & Warwickshire; CR, cardiac rehabilitation;

5  
6 \*Assessment to include six-minute walk, five times sit-to-stand, grip strength, isometric leg  
7 strength, Generalised Anxiety Disorder assessment (GAD-7), Patient Health Questionnaire  
8 (PHQ-9), 12-Item Short Form Survey (SF-12), 5-Item EuroQol (EQ-5D), client service  
9 receipt inventory (CSRI).  
10  
11  
12  
13  
14

15  
16  
17  
18  
19 **Contributions:** SE is the Chief Investigator for the trial, leading on protocol development  
20 and the research ethics application. SE, GL, SW, TB, GM, PK, AK, RP and PB all  
21 contributed fully to the study design. TB (cardiothoracic surgery) PK (statistics), AK (health  
22 economics), provided discipline specific expertise and authored the relevant sections of the  
23 protocol and manuscript. GM prepared the manuscript which was edited by SE, TB, PK and  
24 AK. All authors read and approved the final version of the manuscript.  
25  
26  
27  
28  
29  
30  
31  
32  
33  
34  
35  
36

37 **Funding:** This work was supported by the Jeremy Pilcher Memorial Fund (UHCW), the  
38 Medical & Life Sciences Research Fund, and Atrium Health Ltd, Coventry.  
39  
40  
41  
42  
43  
44

45 **Competing interests:** none.  
46  
47  
48  
49  
50  
51  
52  
53  
54  
55

## References

1. Page RD MJ, Kinsman S. econd National Thoracic Surgery Activity & Outcomes Report on behalf of the Society for Cardiothoracic Surgery in Great Britain & Ireland. Published by Dendrite Clinical SystemsLtd. Henley-on-Thames. ISBN 978-0-9568154-1-5. 2011.
2. King KM, Parry M, Southern D, Faris P, Tsuyuki RT. Women's Recovery from Sternotomy-Extension (WREST-E) study: examining long-term pain and discomfort following sternotomy and their predictors. *Heart*. 2008;94(4):493-7.
3. Kehlet H, Jensen TS, Woolf CJ. Persistent postsurgical pain: risk factors and prevention. *Lancet*. 2006;367(9522):1618-25.
4. Moon MH, Kang JK, Kim HW, Jo KH, Choi SH, Song H. Pain after median sternotomy: collateral damage or mitigatable byproduct? *Thorac Cardiovasc Surg*. 2013;61(3):194-201.
5. Falcoz PE, Chocron S, Stoica L, Kaili D, Puyraveau M, Mercier M, et al. Open heart surgery: one-year self-assessment of quality of life and functional outcome. *Ann Thorac Surg*. 2003;76(5):1598-604; discussion 604.
6. Cahalin LP, Lapier TK, Shaw DK. Sternal Precautions: Is It Time for Change? Precautions versus Restrictions - A Review of Literature and Recommendations for Revision. *Cardiopulm Phys Ther J*. 2011;22(1):5-15.
7. Adams J, Lotshaw A, Exum E, Campbell M, Spranger CB, Beveridge J, et al. An alternative approach to prescribing sternal precautions after median sternotomy, "Keep Your Move in the Tube". *Proc (Bayl Univ Med Cent)*. 2016;29(1):97-100.
8. Anderson L, Thompson DR, Oldridge N, Zwisler AD, Rees K, Martin N, et al. Exercise-based cardiac rehabilitation for coronary heart disease. *Cochrane Database Syst Rev*. 2016(1):CD001800.
9. Barons MJ, Turner S, Parsons N, Griffiths F, Bethell H, Weich S, et al. Fitness predicts long-term survival after a cardiovascular event: a prospective cohort study. *BMJ Open*. 2015;5(10):e007772.
10. Losanoff JE, Richman BW, Jones JW. Disruption and infection of median sternotomy: a comprehensive review. *Eur J Cardiothorac Surg*. 2002;21(5):831-9.
11. Ridderstolpe L, Gill H, Granfeldt H, Ahlfeldt H, Rutberg H. Superficial and deep sternal wound complications: incidence, risk factors and mortality. *Eur J Cardiothorac Surg*. 2001;20(6):1168-75.
12. Adams J, Cline MJ, Hubbard M, McCullough T, Hartman J. A new paradigm for post-cardiac event resistance exercise guidelines. *Am J Cardiol*. 2006;97(2):281-6.
13. Parker R, Adams JL, Ogola G, McBrayer D, Hubbard JM, McCullough TL, et al. Current activity guidelines for CABG patients are too restrictive: comparison of the forces exerted on the median sternotomy during a cough vs. lifting activities combined with valsalva maneuver. *Thorac Cardiovasc Surg*. 2008;56(4):190-4.
14. McGuire DK, Levine BD, Williamson JW, Snell PG, Blomqvist CG, Saltin B, et al. A 30-year follow-up of the Dallas Bedrest and Training Study: I. Effect of age on the cardiovascular response to exercise. *Circulation*. 2001;104(12):1350-7.
15. Perhonen MA, Franco F, Lane LD, Buckley JC, Blomqvist CG, Zerwekh JE, et al. Cardiac atrophy after bed rest and spaceflight. *J Appl Physiol* (1985). 2001;91(2):645-53.
16. Wall BT, Dirks ML, van Loon LJ. Skeletal muscle atrophy during short-term disuse: implications for age-related sarcopenia. *Ageing Res Rev*. 2013;12(4):898-906.
17. Berry SD, Samelson EJ, Bordes M, Broe K, Kiel DP. Survival of aged nursing home residents with hip fracture. *J Gerontol A Biol Sci Med Sci*. 2009;64(7):771-7.
18. Eder B, Hofmann P, von Duvillard SP, Brandt D, Schmid JP, Pokan R, et al. Early 4-week cardiac rehabilitation exercise training in elderly patients after heart surgery. *J Cardiopulm Rehabil Prev*. 2010;30(2):85-92.
19. Hirschhorn AD, Richards DA, Mungovan SF, Morris NR, Adams L. Does the mode of exercise influence recovery of functional capacity in the early postoperative period after coronary artery

- bypass graft surgery? A randomized controlled trial. *Interact Cardiovasc Thorac Surg*. 2012;15(6):995-1003.
20. Hojskov IE, Moons P, Hansen NV, Greve H, Olsen DB, Cour SL, et al. Early physical training and psycho-educational intervention for patients undergoing coronary artery bypass grafting. The SheppHeart randomized 2 x 2 factorial clinical pilot trial. *Eur J Cardiovasc Nurs*. 2016;15(6):425-37.
21. Pack QR, Dudycha KJ, Roschen KP, Thomas RJ, Squires RW. Safety of early enrollment into outpatient cardiac rehabilitation after open heart surgery. *Am J Cardiol*. 2015;115(4):548-52.
22. Fell J, Dale V, Doherty P. Does the timing of cardiac rehabilitation impact fitness outcomes? An observational analysis. *Open Heart*. 2016;3(1):e000369.
23. Marzolini S, Blanchard C, Alter DA, Grace SL, Oh PI. Delays in Referral and Enrolment Are Associated With Mitigated Benefits of Cardiac Rehabilitation After Coronary Artery Bypass Surgery. *Circ Cardiovasc Qual Outcomes*. 2015;8(6):608-20.
24. Johnson DA, Sacrinty MT, Gomadam PS, Mehta HJ, Brady MM, Douglas CJ, et al. Effect of early enrollment on outcomes in cardiac rehabilitation. *Am J Cardiol*. 2014;114(12):1908-11.
25. Russell KL, Holloway TM, Brum M, Caruso V, Chessex C, Grace SL. Cardiac rehabilitation wait times: effect on enrollment. *J Cardiopulm Rehabil Prev*. 2011;31(6):373-7.
26. Chan AW, Tetzlaff JM, Altman DG, Laupacis A, Gotzsche PC, Krleza-Jeric K, et al. SPIRIT 2013 statement: defining standard protocol items for clinical trials. *Ann Intern Med*. 2013;158(3):200-7.
27. ACPICR. Standards for physical activity and exercise in the cardiac population. [http://acpicr.com/sites/default/files/ACPICR\\_Standards\\_2015\\_0.pdf](http://acpicr.com/sites/default/files/ACPICR_Standards_2015_0.pdf). 2015.
28. AACVPR. Guidelines for Cardiac Rehabilitation and Secondary Prevention Programs-4th Edition Champaign, IL: Human Kinetics; 2003.
29. ACSM. Guidelines for exercise testing and prescription. 9th ed. Riverwoods, IL: Lippincott Williams & Wilkins; 2014.
30. Ross RM, Murthy JN, Wollak ID, Jackson AS. The six minute walk test accurately estimates mean peak oxygen uptake. *BMC Pulm Med*. 2010;10:31.
31. Opasich C, De Feo S, Pinna GD, Furgi G, Pedretti R, Scrutinio D, et al. Distance walked in the 6-minute test soon after cardiac surgery: toward an efficient use in the individual patient. *Chest*. 2004;126(6):1796-801.
32. Beatty AL, Schiller NB, Whooley MA. Six-minute walk test as a prognostic tool in stable coronary heart disease: data from the heart and soul study. *Arch Intern Med*. 2012;172(14):1096-102.
33. Holland AE, Spruit MA, Troosters T, Puhan MA, Pepin V, Saey D, et al. An official European Respiratory Society/American Thoracic Society technical standard: field walking tests in chronic respiratory disease. *Eur Respir J*. 2014;44(6):1428-46.
34. Ng S. Balance ability, not muscle strength and exercise endurance, determines the performance of hemiparetic subjects on the timed-sit-to-stand test. *Am J Phys Med Rehabil*. 2010;89(6):497-504.
35. Bohannon RW. Test-retest reliability of the five-repetition sit-to-stand test: a systematic review of the literature involving adults. *J Strength Cond Res*. 2011;25(11):3205-7.
36. Fess EE. Grip strength. In J.S. Casanova (Ed.), *Clinical Assessment Recommendations* (pp. 41–5). 2nd edition. American Society of Hand Therapists, Chicago. 1992.
37. Hansen EM, McCartney CN, Sweeney RS, Palimenio MR, Grindstaff TL. Hand-held Dynamometer Positioning Impacts Discomfort During Quadriceps Strength Testing: A Validity and Reliability Study. *Int J Sports Phys Ther*. 2015;10(1):62-8.
38. Spitzer RL, Kroenke K, Williams JB, Lowe B. A brief measure for assessing generalized anxiety disorder: the GAD-7. *Arch Intern Med*. 2006;166(10):1092-7.
39. Kroenke K. Depression screening is not enough. *Ann Intern Med*. 2001;134(5):418-20.
40. Rehabilitation NAoC. Annual Report. York, UK; 2016.

- 1
- 2
- 3 41. Ware J, Jr., Kosinski M, Keller SD. A 12-Item Short-Form Health Survey: construction of scales and preliminary tests of reliability and validity. *Med Care*. 1996;34(3):220-33.
- 4 42. Dolan P. Modeling valuations for EuroQol health states. *Med Care*. 1997;35(11):1095-108.
- 5 43. NICE. Guide to the Methods of Technology Appraisal. National Institute of Health and Clinical  
6 Excellence, London. 2013.
- 7 44. Ridyard CH, Hughes DA. Methods for the collection of resource use data within clinical trials:  
8 a systematic review of studies funded by the UK Health Technology Assessment program. *Value*  
9 *Health*. 2010;13(8):867-72.
- 10 45. ICH Harmonised Tripartite guideline - guideline for good clinical practice E6 (R1).  
11 [http://www.ich.org/products/guidelines/efficacy/efficacy-single/article/good-clinical-](http://www.ich.org/products/guidelines/efficacy/efficacy-single/article/good-clinical-practice.html)  
12 [practice.html](http://www.ich.org/products/guidelines/efficacy/efficacy-single/article/good-clinical-practice.html). 1996.
- 13 46. Wyrwich KW, Tierney WM, Babu AN, Kroenke K, Wolinsky FD. A comparison of clinically  
14 important differences in health-related quality of life for patients with chronic lung disease, asthma,  
15 or heart disease. *Health Serv Res*. 2005;40(2):577-91.
- 16 47. Bohannon RW, Crouch R. Minimal clinically important difference for change in 6-minute  
17 walk test distance of adults with pathology: a systematic review. *J Eval Clin Pract*. 2017;23(2):377-81.
- 18 48. Shoemaker MJ, Curtis AB, Vangsnes E, Dickinson MG. Clinically meaningful change estimates  
19 for the six-minute walk test and daily activity in individuals with chronic heart failure. *Cardiopulm*  
20 *Phys Ther J*. 2013;24(3):21-9.
- 21 49. Gremaux V, Troisgros O, Benaim S, Hannequin A, Laurent Y, Casillas JM, et al. Determining  
22 the minimal clinically important difference for the six-minute walk test and the 200-meter fast-walk  
23 test during cardiac rehabilitation program in coronary artery disease patients after acute coronary  
24 syndrome. *Arch Phys Med Rehabil*. 2011;92(4):611-9.
- 25 50. Moher D, Hopewell S, Schulz KF, Montori V, Gotzsche PC, Devereaux PJ, et al. CONSORT  
26 2010 explanation and elaboration: updated guidelines for reporting parallel group randomised trials.  
27 *BMJ*. 2010;340:c869.
- 28 51. Drummond MF, Sculpher, M.J., Claxton, K., Stoddart, G.L. and Torrance, G.W. *Methods for*  
29 *the economic evaluation of health care programmes.*: Oxford University Press; 2015.
- 30 52. Thorn JC, Brookes ST, Ridyard C, Riley R, Hughes DA, Wordsworth S, et al. Core Items for a  
31 Standardized Resource Use Measure (ISRUM): Expert Delphi Consensus Survey. *Value in Health*.
- 32 53. Deb P, Norton, E.C., and Manning, W. G. *Health Econometrics Using Stata*: Stata Press;  
33 2017.
- 34 54. Husereau D, Drummond M, Petrou S, Carswell C, Moher D, Greenberg D, et al. Consolidated  
35 Health Economic Evaluation Reporting Standards (CHEERS) statement. *BMJ*. 2013;346:f1049.
- 36
- 37
- 38
- 39
- 40
- 41
- 42
- 43
- 44
- 45
- 46
- 47
- 48
- 49
- 50
- 51
- 52
- 53
- 54
- 55
- 56
- 57
- 58
- 59
- 60

1  
2  
3  
4  
5  
6  
7  
8  
9  
10  
11  
12  
13  
14  
15  
16  
17  
18  
19  
20  
21  
22  
23  
24  
25  
26  
27  
28  
29  
30  
31  
32  
33  
34  
35  
36  
37  
38  
39  
40  
41  
42  
43  
44  
45  
46  
47  
48  
49  
50  
51  
52  
53  
54  
55  
56  
57  
58  
59  
60

Figure 1. Trial flow chart

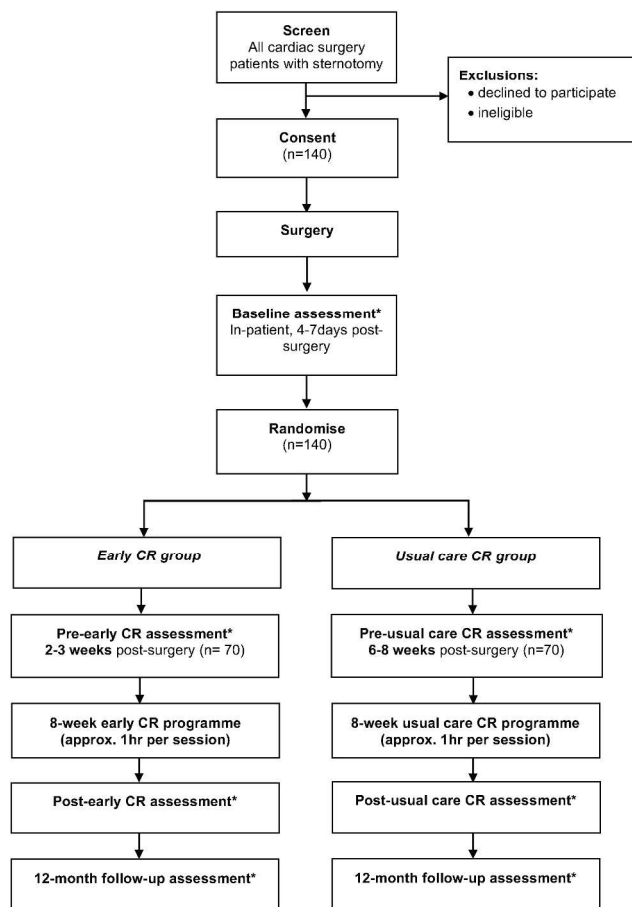

Figure 1. Trial flow chart

210x297mm (300 x 300 DPI)



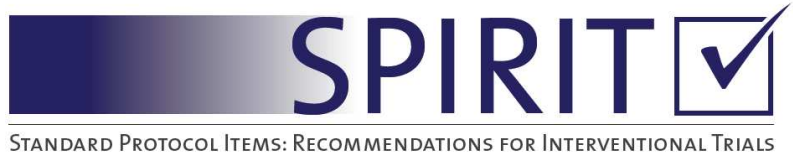

SPIRIT 2013 Checklist: Recommended items to address in a clinical trial protocol and related documents\*

| Section/item                      | Item No | Description                                                                                                                                                                                                                                                                              |                    |
|-----------------------------------|---------|------------------------------------------------------------------------------------------------------------------------------------------------------------------------------------------------------------------------------------------------------------------------------------------|--------------------|
| <b>Administrative information</b> |         |                                                                                                                                                                                                                                                                                          |                    |
| Title                             | 1       | Descriptive title identifying the study design, population, interventions, and, if applicable, trial acronym                                                                                                                                                                             | ___ 1,4 ___        |
| Trial registration                | 2a      | Trial identifier and registry name. If not yet registered, name of intended registry                                                                                                                                                                                                     | ___ 1 ___          |
|                                   | 2b      | All items from the World Health Organization Trial Registration Data Set                                                                                                                                                                                                                 | ___ throughout ___ |
| Protocol version                  | 3       | Date and version identifier                                                                                                                                                                                                                                                              | ___ all ___        |
| Funding                           | 4       | Sources and types of financial, material, and other support                                                                                                                                                                                                                              | ___ n/a ___        |
| Roles and responsibilities        | 5a      | Names, affiliations, and roles of protocol contributors                                                                                                                                                                                                                                  | ___ 3 ___          |
|                                   | 5b      | Name and contact information for the trial sponsor                                                                                                                                                                                                                                       | ___ 4 ___          |
|                                   | 5c      | Role of study sponsor and funders, if any, in study design; collection, management, analysis, and interpretation of data; writing of the report; and the decision to submit the report for publication, including whether they will have ultimate authority over any of these activities | ___ n/a ___        |
|                                   | 5d      | Composition, roles, and responsibilities of the coordinating centre, steering committee, endpoint adjudication committee, data management team, and other individuals or groups overseeing the trial, if applicable (see Item 21a for data monitoring committee)                         | ___ 24-26 ___      |

## Introduction

|                          |    |                                                                                                                                                                                                           |             |
|--------------------------|----|-----------------------------------------------------------------------------------------------------------------------------------------------------------------------------------------------------------|-------------|
| Background and rationale | 6a | Description of research question and justification for undertaking the trial, including summary of relevant studies (published and unpublished) examining benefits and harms for each intervention        | ___12-16___ |
|                          | 6b | Explanation for choice of comparators                                                                                                                                                                     | ___12-16___ |
| Objectives               | 7  | Specific objectives or hypotheses                                                                                                                                                                         | ___13___    |
| Trial design             | 8  | Description of trial design including type of trial (eg, parallel group, crossover, factorial, single group), allocation ratio, and framework (eg, superiority, equivalence, noninferiority, exploratory) | ___4___     |

## Methods: Participants, interventions, and outcomes

|                      |     |                                                                                                                                                                                                                                                                                                                                                                                |             |
|----------------------|-----|--------------------------------------------------------------------------------------------------------------------------------------------------------------------------------------------------------------------------------------------------------------------------------------------------------------------------------------------------------------------------------|-------------|
| Study setting        | 9   | Description of study settings (eg, community clinic, academic hospital) and list of countries where data will be collected. Reference to where list of study sites can be obtained                                                                                                                                                                                             | ___18___    |
| Eligibility criteria | 10  | Inclusion and exclusion criteria for participants. If applicable, eligibility criteria for study centres and individuals who will perform the interventions (eg, surgeons, psychotherapists)                                                                                                                                                                                   | ___18___    |
| Interventions        | 11a | Interventions for each group with sufficient detail to allow replication, including how and when they will be administered                                                                                                                                                                                                                                                     | ___13___    |
|                      | 11b | Criteria for discontinuing or modifying allocated interventions for a given trial participant (eg, drug dose change in response to harms, participant request, or improving/worsening disease)                                                                                                                                                                                 | ___16,22___ |
|                      | 11c | Strategies to improve adherence to intervention protocols, and any procedures for monitoring adherence (eg, drug tablet return, laboratory tests)                                                                                                                                                                                                                              | ___n/a___   |
|                      | 11d | Relevant concomitant care and interventions that are permitted or prohibited during the trial                                                                                                                                                                                                                                                                                  | ___n/a___   |
| Outcomes             | 12  | Primary, secondary, and other outcomes, including the specific measurement variable (eg, systolic blood pressure), analysis metric (eg, change from baseline, final value, time to event), method of aggregation (eg, median, proportion), and time point for each outcome. Explanation of the clinical relevance of chosen efficacy and harm outcomes is strongly recommended | ___17-21___ |
| Participant timeline | 13  | Time schedule of enrolment, interventions (including any run-ins and washouts), assessments, and visits for participants. A schematic diagram is highly recommended (see Figure)                                                                                                                                                                                               | ___6___     |

|   |             |    |                                                                                                                                                                                       |               |
|---|-------------|----|---------------------------------------------------------------------------------------------------------------------------------------------------------------------------------------|---------------|
| 1 |             |    |                                                                                                                                                                                       |               |
| 2 |             |    |                                                                                                                                                                                       |               |
| 3 | Sample size | 14 | Estimated number of participants needed to achieve study objectives and how it was determined, including clinical and statistical assumptions supporting any sample size calculations | _____23_____  |
| 4 |             |    |                                                                                                                                                                                       |               |
| 5 | Recruitment | 15 | Strategies for achieving adequate participant enrolment to reach target sample size                                                                                                   | _____n/a_____ |
| 6 |             |    |                                                                                                                                                                                       |               |
| 7 |             |    |                                                                                                                                                                                       |               |

### 8 **Methods: Assignment of interventions (for controlled trials)**

#### 9 Allocation:

|    |                                  |     |                                                                                                                                                                                                                                                                                                                                                          |               |
|----|----------------------------------|-----|----------------------------------------------------------------------------------------------------------------------------------------------------------------------------------------------------------------------------------------------------------------------------------------------------------------------------------------------------------|---------------|
| 10 |                                  |     |                                                                                                                                                                                                                                                                                                                                                          |               |
| 11 |                                  |     |                                                                                                                                                                                                                                                                                                                                                          |               |
| 12 | Sequence generation              | 16a | Method of generating the allocation sequence (eg, computer-generated random numbers), and list of any factors for stratification. To reduce predictability of a random sequence, details of any planned restriction (eg, blocking) should be provided in a separate document that is unavailable to those who enrol participants or assign interventions | _____12_____  |
| 13 |                                  |     |                                                                                                                                                                                                                                                                                                                                                          |               |
| 14 |                                  |     |                                                                                                                                                                                                                                                                                                                                                          |               |
| 15 |                                  |     |                                                                                                                                                                                                                                                                                                                                                          |               |
| 16 |                                  |     |                                                                                                                                                                                                                                                                                                                                                          |               |
| 17 | Allocation concealment mechanism | 16b | Mechanism of implementing the allocation sequence (eg, central telephone; sequentially numbered, opaque, sealed envelopes), describing any steps to conceal the sequence until interventions are assigned                                                                                                                                                | _____19_____  |
| 18 |                                  |     |                                                                                                                                                                                                                                                                                                                                                          |               |
| 19 |                                  |     |                                                                                                                                                                                                                                                                                                                                                          |               |
| 20 |                                  |     |                                                                                                                                                                                                                                                                                                                                                          |               |
| 21 | Implementation                   | 16c | Who will generate the allocation sequence, who will enrol participants, and who will assign participants to interventions                                                                                                                                                                                                                                | _____19_____  |
| 22 |                                  |     |                                                                                                                                                                                                                                                                                                                                                          |               |
| 23 |                                  |     |                                                                                                                                                                                                                                                                                                                                                          |               |
| 24 | Blinding (masking)               | 17a | Who will be blinded after assignment to interventions (eg, trial participants, care providers, outcome assessors, data analysts), and how                                                                                                                                                                                                                | _____19_____  |
| 25 |                                  |     |                                                                                                                                                                                                                                                                                                                                                          |               |
| 26 |                                  |     |                                                                                                                                                                                                                                                                                                                                                          |               |
| 27 |                                  | 17b | If blinded, circumstances under which unblinding is permissible, and procedure for revealing a participant's allocated intervention during the trial                                                                                                                                                                                                     | _____n/a_____ |
| 28 |                                  |     |                                                                                                                                                                                                                                                                                                                                                          |               |
| 29 |                                  |     |                                                                                                                                                                                                                                                                                                                                                          |               |
| 30 |                                  |     |                                                                                                                                                                                                                                                                                                                                                          |               |

### 31 **Methods: Data collection, management, and analysis**

|    |                         |     |                                                                                                                                                                                                                                                                                                                                                                                                              |              |
|----|-------------------------|-----|--------------------------------------------------------------------------------------------------------------------------------------------------------------------------------------------------------------------------------------------------------------------------------------------------------------------------------------------------------------------------------------------------------------|--------------|
| 32 |                         |     |                                                                                                                                                                                                                                                                                                                                                                                                              |              |
| 33 | Data collection methods | 18a | Plans for assessment and collection of outcome, baseline, and other trial data, including any related processes to promote data quality (eg, duplicate measurements, training of assessors) and a description of study instruments (eg, questionnaires, laboratory tests) along with their reliability and validity, if known. Reference to where data collection forms can be found, if not in the protocol | _____20_____ |
| 34 |                         |     |                                                                                                                                                                                                                                                                                                                                                                                                              |              |
| 35 |                         |     |                                                                                                                                                                                                                                                                                                                                                                                                              |              |
| 36 |                         |     |                                                                                                                                                                                                                                                                                                                                                                                                              |              |
| 37 |                         |     |                                                                                                                                                                                                                                                                                                                                                                                                              |              |
| 38 |                         | 18b | Plans to promote participant retention and complete follow-up, including list of any outcome data to be collected for participants who discontinue or deviate from intervention protocols                                                                                                                                                                                                                    | _____22_____ |
| 39 |                         |     |                                                                                                                                                                                                                                                                                                                                                                                                              |              |
| 40 |                         |     |                                                                                                                                                                                                                                                                                                                                                                                                              |              |
| 41 |                         |     |                                                                                                                                                                                                                                                                                                                                                                                                              |              |
| 42 |                         |     |                                                                                                                                                                                                                                                                                                                                                                                                              |              |
| 43 |                         |     |                                                                                                                                                                                                                                                                                                                                                                                                              |              |
| 44 |                         |     |                                                                                                                                                                                                                                                                                                                                                                                                              |              |
| 45 |                         |     |                                                                                                                                                                                                                                                                                                                                                                                                              |              |
| 46 |                         |     |                                                                                                                                                                                                                                                                                                                                                                                                              |              |
| 47 |                         |     |                                                                                                                                                                                                                                                                                                                                                                                                              |              |

|    |                                 |     |                                                                                                                                                                                                                                                                                                                                       |                 |
|----|---------------------------------|-----|---------------------------------------------------------------------------------------------------------------------------------------------------------------------------------------------------------------------------------------------------------------------------------------------------------------------------------------|-----------------|
| 1  |                                 |     |                                                                                                                                                                                                                                                                                                                                       |                 |
| 2  |                                 |     |                                                                                                                                                                                                                                                                                                                                       |                 |
| 3  | Data management                 | 19  | Plans for data entry, coding, security, and storage, including any related processes to promote data quality (eg, double data entry; range checks for data values). Reference to where details of data management procedures can be found, if not in the protocol                                                                     | _____24_____    |
| 4  |                                 |     |                                                                                                                                                                                                                                                                                                                                       |                 |
| 5  |                                 |     |                                                                                                                                                                                                                                                                                                                                       |                 |
| 6  |                                 |     |                                                                                                                                                                                                                                                                                                                                       |                 |
| 7  | Statistical methods             | 20a | Statistical methods for analysing primary and secondary outcomes. Reference to where other details of the statistical analysis plan can be found, if not in the protocol                                                                                                                                                              | _____22_____    |
| 8  |                                 |     |                                                                                                                                                                                                                                                                                                                                       |                 |
| 9  |                                 |     |                                                                                                                                                                                                                                                                                                                                       |                 |
| 10 |                                 | 20b | Methods for any additional analyses (eg, subgroup and adjusted analyses)                                                                                                                                                                                                                                                              | _____22_____    |
| 11 |                                 |     |                                                                                                                                                                                                                                                                                                                                       |                 |
| 12 |                                 | 20c | Definition of analysis population relating to protocol non-adherence (eg, as randomised analysis), and any statistical methods to handle missing data (eg, multiple imputation)                                                                                                                                                       | _____22_____    |
| 13 |                                 |     |                                                                                                                                                                                                                                                                                                                                       |                 |
| 14 |                                 |     |                                                                                                                                                                                                                                                                                                                                       |                 |
| 15 | <b>Methods: Monitoring</b>      |     |                                                                                                                                                                                                                                                                                                                                       |                 |
| 16 |                                 |     |                                                                                                                                                                                                                                                                                                                                       |                 |
| 17 |                                 |     |                                                                                                                                                                                                                                                                                                                                       |                 |
| 18 | Data monitoring                 | 21a | Composition of data monitoring committee (DMC); summary of its role and reporting structure; statement of whether it is independent from the sponsor and competing interests; and reference to where further details about its charter can be found, if not in the protocol. Alternatively, an explanation of why a DMC is not needed | _____N/A_____   |
| 19 |                                 |     |                                                                                                                                                                                                                                                                                                                                       |                 |
| 20 |                                 |     |                                                                                                                                                                                                                                                                                                                                       |                 |
| 21 |                                 |     |                                                                                                                                                                                                                                                                                                                                       |                 |
| 22 |                                 |     |                                                                                                                                                                                                                                                                                                                                       |                 |
| 23 |                                 | 21b | Description of any interim analyses and stopping guidelines, including who will have access to these interim results and make the final decision to terminate the trial                                                                                                                                                               | _____N/A_____   |
| 24 |                                 |     |                                                                                                                                                                                                                                                                                                                                       |                 |
| 25 |                                 |     |                                                                                                                                                                                                                                                                                                                                       |                 |
| 26 | Harms                           | 22  | Plans for collecting, assessing, reporting, and managing solicited and spontaneously reported adverse events and other unintended effects of trial interventions or trial conduct                                                                                                                                                     | _____26_____    |
| 27 |                                 |     |                                                                                                                                                                                                                                                                                                                                       |                 |
| 28 |                                 |     |                                                                                                                                                                                                                                                                                                                                       |                 |
| 29 | Auditing                        | 23  | Frequency and procedures for auditing trial conduct, if any, and whether the process will be independent from investigators and the sponsor                                                                                                                                                                                           | _____24-25_____ |
| 30 |                                 |     |                                                                                                                                                                                                                                                                                                                                       |                 |
| 31 |                                 |     |                                                                                                                                                                                                                                                                                                                                       |                 |
| 32 |                                 |     |                                                                                                                                                                                                                                                                                                                                       |                 |
| 33 | <b>Ethics and dissemination</b> |     |                                                                                                                                                                                                                                                                                                                                       |                 |
| 34 |                                 |     |                                                                                                                                                                                                                                                                                                                                       |                 |
| 35 | Research ethics approval        | 24  | Plans for seeking research ethics committee/institutional review board (REC/IRB) approval                                                                                                                                                                                                                                             | _____1_____     |
| 36 |                                 |     |                                                                                                                                                                                                                                                                                                                                       |                 |
| 37 |                                 |     |                                                                                                                                                                                                                                                                                                                                       |                 |
| 38 | Protocol amendments             | 25  | Plans for communicating important protocol modifications (eg, changes to eligibility criteria, outcomes, analyses) to relevant parties (eg, investigators, REC/IRBs, trial participants, trial registries, journals, regulators)                                                                                                      | _____X_____     |
| 39 |                                 |     |                                                                                                                                                                                                                                                                                                                                       |                 |
| 40 |                                 |     |                                                                                                                                                                                                                                                                                                                                       |                 |
| 41 |                                 |     |                                                                                                                                                                                                                                                                                                                                       |                 |
| 42 |                                 |     |                                                                                                                                                                                                                                                                                                                                       |                 |
| 43 |                                 |     |                                                                                                                                                                                                                                                                                                                                       |                 |
| 44 |                                 |     |                                                                                                                                                                                                                                                                                                                                       |                 |
| 45 |                                 |     |                                                                                                                                                                                                                                                                                                                                       |                 |
| 46 |                                 |     |                                                                                                                                                                                                                                                                                                                                       |                 |
| 47 |                                 |     |                                                                                                                                                                                                                                                                                                                                       |                 |

1  
2  
3  
4  
5  
6  
7  
8  
9  
10  
11  
12  
13  
14  
15  
16  
17  
18  
19  
20  
21  
22  
23  
24  
25  
26  
27  
28  
29  
30  
31  
32  
33  
34  
35  
36  
37  
38  
39  
40  
41  
42  
43  
44  
45  
46  
47

|                               |     |                                                                                                                                                                                                                                                                                     |                        |
|-------------------------------|-----|-------------------------------------------------------------------------------------------------------------------------------------------------------------------------------------------------------------------------------------------------------------------------------------|------------------------|
| Consent or assent             | 26a | Who will obtain informed consent or assent from potential trial participants or authorised surrogates, and how (see Item 32)                                                                                                                                                        | ___19___               |
|                               | 26b | Additional consent provisions for collection and use of participant data and biological specimens in ancillary studies, if applicable                                                                                                                                               | ___N/A___              |
| Confidentiality               | 27  | How personal information about potential and enrolled participants will be collected, shared, and maintained in order to protect confidentiality before, during, and after the trial                                                                                                | ___24-26___            |
| Declaration of interests      | 28  | Financial and other competing interests for principal investigators for the overall trial and each study site                                                                                                                                                                       | ___2___                |
| Access to data                | 29  | Statement of who will have access to the final trial dataset, and disclosure of contractual agreements that limit such access for investigators                                                                                                                                     | ___26___               |
| Ancillary and post-trial care | 30  | Provisions, if any, for ancillary and post-trial care, and for compensation to those who suffer harm from trial participation                                                                                                                                                       | ___ethics___           |
| Dissemination policy          | 31a | Plans for investigators and sponsor to communicate trial results to participants, healthcare professionals, the public, and other relevant groups (eg, via publication, reporting in results databases, or other data sharing arrangements), including any publication restrictions | ___ethics___           |
|                               | 31b | Authorship eligibility guidelines and any intended use of professional writers                                                                                                                                                                                                      | ___N/A___              |
|                               | 31c | Plans, if any, for granting public access to the full protocol, participant-level dataset, and statistical code                                                                                                                                                                     | ___N/A___              |
| <b>Appendices</b>             |     |                                                                                                                                                                                                                                                                                     |                        |
| Informed consent materials    | 32  | Model consent form and other related documentation given to participants and authorised surrogates                                                                                                                                                                                  | ___Site file/ethics___ |
| Biological specimens          | 33  | Plans for collection, laboratory evaluation, and storage of biological specimens for genetic or molecular analysis in the current trial and for future use in ancillary studies, if applicable                                                                                      | ___N/A___              |

---

\*It is strongly recommended that this checklist be read in conjunction with the SPIRIT 2013 Explanation & Elaboration for important clarification on the items. Amendments to the protocol should be tracked and dated. The SPIRIT checklist is copyrighted by the SPIRIT Group under the Creative Commons "[Attribution-NonCommercial-NoDerivs 3.0 Unported](https://creativecommons.org/licenses/by-nc-nd/3.0/)" license.
